# Supplementary material for: Discovery and photosynthesis of sinuaustones A and B, diterpenoids with a novel carbon scaffold isolated from soft coral Sinularia australiensis from Hainan
Source: Royal Society of Chemistry journal article supplement (doi:10.1039/d2qo01265k), 2022-01-01
Supplement: d2qo01265k1.pdf [file d2qo01265k1.pdf]

*Supporting Information*

**Discovery and Photosynthesis of Sinuaustones A and B, Diterpenoids with Novel Carbon Scaffold isolated from Soft Coral *Sinularia australiensis* from Hainan**

Meng-Jun Wu,<sup>a,b</sup> Dan-Dan Yu,<sup>c</sup> Ming-Zhi Su,<sup>c</sup> Jian-Rong Wang,<sup>b</sup> Lei Gong,<sup>d</sup> Zai-Yong Zhang,<sup>b</sup> Hong Wang<sup>\*a</sup> and Yue-Wei Guo<sup>\*a,b,c,e</sup>

<sup>a</sup> Collaborative Innovation Center of Yangtze River Delta Region Green Pharmaceuticals and College of Pharmaceutical Science, Zhejiang University of Technology, Hangzhou 310014, China.

<sup>b</sup> State Key Laboratory of Drug Research, Shanghai Institute of Materia Medica, Chinese Academy of Sciences, Shanghai 201203, China.

<sup>c</sup> Shandong Laboratory of Yantai Drug Discovery, Bohai rim Advanced Research Institute for Drug Discovery, Yantai, Shandong 264117, China.

<sup>d</sup> Key Laboratory of Chemical Biology of Fujian Province, College of Chemistry and Chemical Engineering, Xiamen University, Xiamen, Fujian 361005, China.

<sup>e</sup> Open Studio for Druggability Research of Marine Natural Products, Pilot National Laboratory for Marine Science and Technology (Qingdao), Qingdao, 266237, China.

# Contents

|                                                         |    |
|---------------------------------------------------------|----|
| Contents.....                                           | 1  |
| 1. Experiment section .....                             | 2  |
| 1.1 General experimental procedures.....                | 2  |
| 1.2 Cytotoxicity assay .....                            | 2  |
| 1.3 Photosynthesis experiment .....                     | 2  |
| 2. Original data for compounds 1–5 .....                | 2  |
| 2.1 X-ray crystallographic analyses of 1.....           | 2  |
| 2.2 X-ray crystallographic analyses of 2.....           | 3  |
| 2.3 Detailed structural elucidation of compound 2 ..... | 5  |
| 2.4 MS, NMR, IR, CD&UV spectra of compounds 1.....      | 6  |
| 2.5 MS, NMR, IR, CD&UV spectra of compounds 2.....      | 10 |
| 2.6 MS, NMR, IR, CD&UV spectra of compounds 3.....      | 14 |
| 2.7 MS, NMR spectra of compounds 4 .....                | 19 |
| 2.8 MS, NMR spectra of compounds 5 .....                | 20 |
| 3. Computational Section.....                           | 21 |
| 3.1 QM-NMR calculation for compounds 3 .....            | 21 |
| 3.2 Computational details (TDDFT-ECD) of 1-3 .....      | 34 |
| Reference .....                                         | 45 |

## 1. Experiment section

### 1.1 General experimental procedures

Melting points were measured on an X-4 digital micro-melting point apparatus. The X-ray measurements were made on a Bruker D8 Venture X-ray diffractometer with Cu K $\alpha$  radiation. Optical rotations were measured on a Perkin-Elmer 241MC polarimeter (PerkinElmer, Fremont, CA, USA). IR spectra were recorded on a Nicolet 6700 spectrometer (Thermo Scientific, Waltham, MA, USA); peaks are reported in cm<sup>-1</sup>. CD&UV spectra were measured on a JASCO J-815-150s instrument (JASCO, Japan). The NMR spectra were measured at 300 K on Bruker DRX 400, DRX 500 and Avance 600 MHz NMR spectrometers (Bruker Biospin AG, Fallanden, Germany); Chemical shifts are reported in parts per million ( $\delta$ ) in CDCl<sub>3</sub> ( $\delta_H$  reported referred to CHCl<sub>3</sub> at 7.26 ppm;  $\delta_C$  reported referred to CDCl<sub>3</sub> at 77.16 ppm) and coupling constants ( $J$ ) in Hz; assignments were supported by <sup>1</sup>H-<sup>1</sup>H COSY, HSQC, HMBC, and NOESY experiments. LR-EIMS and HR-EIMS data were recorded on a Finnigan-MAT-95 mass spectrometer (Finnigan-MAT, San Jose, CA, USA), respectively. Semi-preparative HPLC was performed on an Agilent-1260 system equipped with a DAD G1315D detector using ODS-HG-5 (250 mm  $\times$  9.4 mm, 5  $\mu$ m) by eluting with CH<sub>3</sub>OH-H<sub>2</sub>O or CH<sub>3</sub>CN-H<sub>2</sub>O system at 2.5 mL/min. Commercial silica gel (100–200, 200–300 and 300–400 mesh; Qingdao, China) was used for column chromatography (CC). Precoated SiO<sub>2</sub> plates (HSGF-254; Yantai, China) were used for analytical TLC. Spots were detected on TLC under UV light or by heating after spraying with anisaldehyde H<sub>2</sub>SO<sub>4</sub> reagent. Sephadex LH-20 (Amersham Biosciences) was also used for CC. All solvents used for column chromatography and HPLC were of analytical grade (Shanghai Chemical Reagents Co., Ltd.) and chromatographic grade (Dikma Technologies Inc.), respectively.

### 1.2 Cytotoxicity assay

**Table S1.** Cytotoxicity assay of Compounds 1-5.

| Cell<br>Conc.( $\mu$ M) | inhibitory ratio (%) |       |       |            |       |       |          |       |       |
|-------------------------|----------------------|-------|-------|------------|-------|-------|----------|-------|-------|
|                         | H1975                |       |       | MDA-MB-231 |       |       | RAW264.7 |       |       |
| )                       | 20                   | 4     | 0.8   | 20         | 4     | 0.8   | 20       | 4     | 0.8   |
| 1                       | 9.59                 | 10.03 | 14.22 | 3.63       | 3.30  | 6.32  | 15.03    | 14.9  | 8.80  |
| 2                       | 8.62                 | 5.30  | 5.20  | -1.90      | -0.51 | 3.58  | 11.97    | 3.71  | -8.90 |
| 3                       | 15.34                | 16.32 | 11.02 | 10.57      | 10.3  | 10.77 | 3.79     | -8.18 | -5.48 |
| 4                       | 4.14                 | 14.68 | 16.20 | 4.61       | 7.35  | 4.60  | 29.81    | 22.86 | 15.1  |
| 5                       | 28.83                | 18.62 | 27.89 | 8.31       | 5.40  | 9.21  | 14.76    | 3.33  | -6.10 |

### 1.3 Photosynthesis experiment

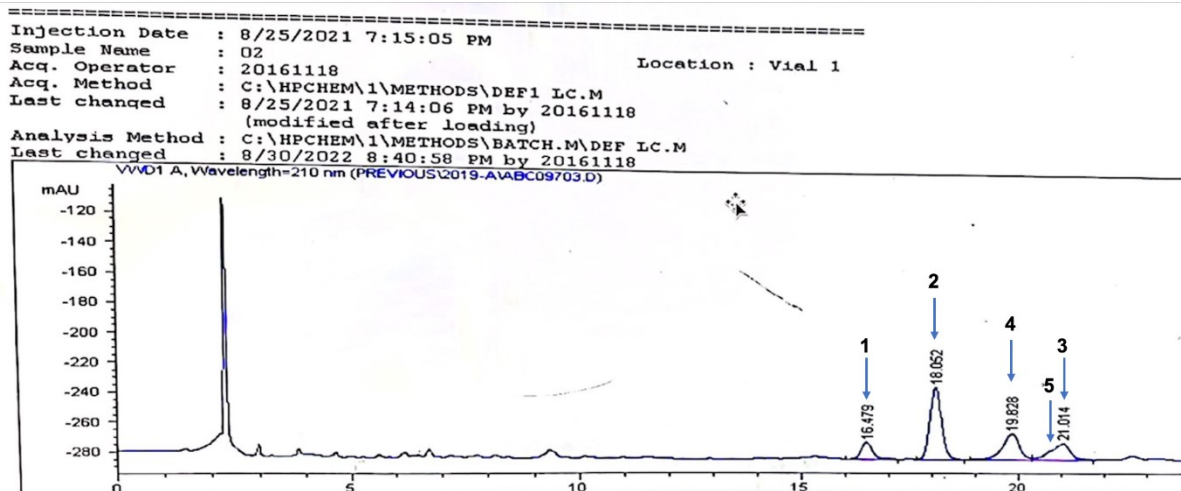

**Figure S1.** Reversed-Phase HPLC separation chromatography of the products of the photosynthesis experiment of compound 5.

## 2. Original data for compounds 1–5

### 2.1 X-ray crystallographic analyses of 1

C<sub>20</sub>H<sub>30</sub>O ( $M = 286.44$  g/mol), crystal size:  $0.12 \times 0.08 \times 0.05$  mm<sup>3</sup>, trigonal, space group P3<sub>1</sub>21,  $a = 9.02720(10)$  Å,  $b = 9.02720(10)$  Å,  $c = 36.5504(11)$  Å,  $V = 2579.46(10)$  Å<sup>3</sup>,  $Z = 6$ ,  $\mu(\text{CuK}\alpha) = 0.494$  mm<sup>-1</sup>,  $D_{\text{calc}} = 1.106$  g/cm<sup>3</sup>,  $\theta$  range =  $7.256$ – $149.162^\circ$ , reflections collected

44959 [ $R_{\text{int}} = 0.0503$ ],  $R_1 = 0.0310$  [ $I > 2\sigma(I)$ ],  $wR_2 = 0.0783$  [all data], absolute structure parameter:  $-0.06(9)$ . The single crystals of compound **1** were collected from a solvent system (CH<sub>3</sub>OH-H<sub>2</sub>O, 9:1) at 4°C. The X-ray measurements were made on a Bruker D8 Venture X-ray diffractometer with Cu K $\alpha$  radiation ( $\lambda = 1.54178$  Å). The crystal was kept at 110.0 K during data collection. Using Olex2<sup>[1]</sup>, the structure was solved with the ShelXT<sup>[2]</sup> structure solution program using Intrinsic Phasing and refined with the ShelXL<sup>[3]</sup> refinement package using Least Squares minimisation. Crystallographic data for **1** has been deposited at the Cambridge Crystallographic Data Centre (Deposition nos. CCDC 2174239). Copies of these data can be obtained free of charge via [www.ccdc.cam.ac.uk/data\\_request/cif](http://www.ccdc.cam.ac.uk/data_request/cif) or from the Cambridge Crystallographic Data Centre, 12 Union Road, Cambridge CB21EZ, UK. [Fax: (+44) 1223-336-033. E-mail: [deposit@ccdc.cam.ac.uk](mailto:deposit@ccdc.cam.ac.uk).]

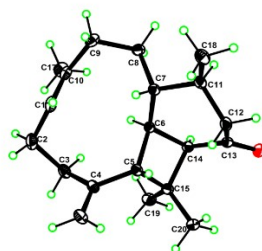

**Figure S2.** Perspective ORTEP drawing of X-ray structure of sinuaustone A (**1**) (displacement ellipsoids are drawn at the 50% probability level).

**Table S2.** X-ray crystallographic data for **1**.

|                                             |                                                                  |
|---------------------------------------------|------------------------------------------------------------------|
| Empirical formula                           | C <sub>20</sub> H <sub>30</sub> O                                |
| Formula weight                              | 286.44                                                           |
| Temperature/K                               | 110                                                              |
| Crystal system                              | trigonal                                                         |
| Space group                                 | P3 <sub>1</sub> 21                                               |
| a/Å                                         | 9.02720(10)                                                      |
| b/Å                                         | 9.02720(10)                                                      |
| c/Å                                         | 36.5504(11)                                                      |
| $\alpha$ /°                                 | 90                                                               |
| $\beta$ /°                                  | 90                                                               |
| $\gamma$ /°                                 | 120                                                              |
| Volume/Å <sup>3</sup>                       | 2579.46(10)                                                      |
| Z                                           | 6                                                                |
| $\rho_{\text{calc}}/\text{cm}^3$            | 1.106                                                            |
| $\mu/\text{mm}^{-1}$                        | 0.494                                                            |
| F(000)                                      | 948.0                                                            |
| Crystal size/mm <sup>3</sup>                | 0.12 × 0.08 × 0.05                                               |
| Radiation                                   | CuK $\alpha$ ( $\lambda = 1.54178$ )                             |
| 2 $\theta$ range for data collection/°      | 7.256 to 149.162                                                 |
| Index ranges                                | -10 ≤ h ≤ 11, -11 ≤ k ≤ 11, -43 ≤ l ≤ 45                         |
| Reflections collected                       | 44959                                                            |
| Independent reflections                     | 3521 [ $R_{\text{int}} = 0.0503$ , $R_{\text{sigma}} = 0.0185$ ] |
| Data/restraints/parameters                  | 3521/0/194                                                       |
| Goodness-of-fit on F <sup>2</sup>           | 1.043                                                            |
| Final R indexes [ $I > 2\sigma(I)$ ]        | $R_1 = 0.0310$ , $wR_2 = 0.0769$                                 |
| Final R indexes [all data]                  | $R_1 = 0.0323$ , $wR_2 = 0.0783$                                 |
| Largest diff. peak/hole / e Å <sup>-3</sup> | 0.19/-0.13                                                       |
| Flack parameter                             | -0.06(9)                                                         |

## 2.2 X-ray crystallographic analyses of **2**

C<sub>20</sub>H<sub>30</sub>O ( $M = 286.44$  g/mol), crystal size: 0.15 × 0.08 × 0.03 mm<sup>3</sup>, orthorhombic, space group P2<sub>1</sub>2<sub>1</sub>2<sub>1</sub>,  $a = 6.3034(2)$  Å,  $b = 16.0980(5)$  Å,  $c = 16.7484(4)$  Å,  $V = 1699.50(9)$  Å<sup>3</sup>,  $Z = 4$ ,  $\mu$  (CuK $\alpha$ ) = 0.499 mm<sup>-1</sup>,  $D_{\text{calc}} = 1.119$  g/cm<sup>3</sup>,  $\theta$  range = 7.616–148.964°, reflections collected 39324 [ $R_{\text{int}} = 0.0651$ ],  $R_1 = 0.0328$  [ $I > 2\sigma(I)$ ],  $wR_2 = 0.0773$  [all data], absolute structure parameter: 0.00(15). The single crystals of compound **1** were collected from methanol solution at 4°C. The X-ray measurements were made on a Bruker D8 Venture X-ray diffractometer with Cu K $\alpha$  radiation ( $\lambda = 1.54178$  Å). The crystal was kept at 170.0 K during data collection. Using Olex2<sup>[1]</sup>, the structure was solved with the ShelXT<sup>[2]</sup> structure solution program using Intrinsic Phasing and refined with the ShelXL<sup>[3]</sup> refinement package using Least Squares minimisation. Crystallographic data for **2** has been deposited at the Cambridge Crystallographic Data Centre (Deposition nos.

CCDC 2174244). Copies of these data can be obtained free of charge via [www.ccdc.cam.ac.uk/data\\_request/cif](http://www.ccdc.cam.ac.uk/data_request/cif) or from the Cambridge Crystallographic Data Centre, 12 Union Road, Cambridge CB21EZ, UK. [Fax: (+44) 1223-336-033. E-mail: [deposit@ccdc.cam.ac.uk](mailto:deposit@ccdc.cam.ac.uk).]

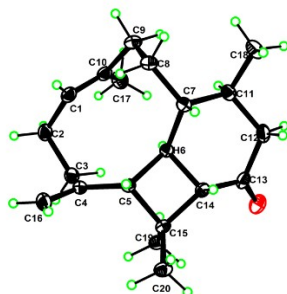

**Figure S3.** Perspective ORTEP drawing of X-ray structure of sinuaustone B (**2**) (displacement ellipsoids are drawn at the 50% probability level).

**Table S3.** X-ray crystallographic data for **2**.

|                                             |                                                               |
|---------------------------------------------|---------------------------------------------------------------|
| Empirical formula                           | C <sub>20</sub> H <sub>30</sub> O                             |
| Formula weight                              | 286.44                                                        |
| Temperature/K                               | 170.0                                                         |
| Crystal system                              | orthorhombic                                                  |
| Space group                                 | P2 <sub>1</sub> 2 <sub>1</sub> 2 <sub>1</sub>                 |
| a/Å                                         | 6.3034(2)                                                     |
| b/Å                                         | 16.0980(5)                                                    |
| c/Å                                         | 16.7484(4)                                                    |
| α/°                                         | 90                                                            |
| β/°                                         | 90                                                            |
| γ/°                                         | 90                                                            |
| Volume/Å <sup>3</sup>                       | 1699.50(9)                                                    |
| Z                                           | 4                                                             |
| ρ <sub>calc</sub> /cm <sup>3</sup>          | 1.119                                                         |
| μ/mm <sup>-1</sup>                          | 0.499                                                         |
| F(000)                                      | 632.0                                                         |
| Crystal size/mm <sup>3</sup>                | 0.15 × 0.08 × 0.03                                            |
| Radiation                                   | CuKα (λ = 1.54178)                                            |
| 2θ range for data collection/°              | 7.616 to 148.964                                              |
| Index ranges                                | -7 ≤ h ≤ 7, -20 ≤ k ≤ 20, -20 ≤ l ≤ 20                        |
| Reflections collected                       | 39324                                                         |
| Independent reflections                     | 3463 [R <sub>int</sub> = 0.0651, R <sub>sigma</sub> = 0.0242] |
| Data/restraints/parameters                  | 3463/0/194                                                    |
| Goodness-of-fit on F <sup>2</sup>           | 1.050                                                         |
| Final R indexes [I ≥ 2σ (I)]                | R <sub>1</sub> = 0.0328, wR <sub>2</sub> = 0.0752             |
| Final R indexes [all data]                  | R <sub>1</sub> = 0.0359, wR <sub>2</sub> = 0.0773             |
| Largest diff. peak/hole / e Å <sup>-3</sup> | 0.17/-0.13                                                    |
| Flack parameter                             | 0.00(15)                                                      |

### 2.3 Detailed structural elucidation of compound **2**

Sinuaustone B (**2**) was obtained as colorless crystals with the molecular formula determined to be  $C_{20}H_{30}O$  by its HREIMS at  $m/z$  286.2291 ( $[M]^+$ , calcd 286.2291), indicating six DBEs. The IR absorptions indicative of the presence of a ketone carbonyl ( $\nu_{\max}$  1717  $cm^{-1}$ ) of **2**. However, the  $^{13}C$  NMR data of **2** were reminiscent of those of **1** (Table 1), especially the typical signals related to the four-membered ring ( $\delta_{C/H}$  59.9/2.18, C-5;  $\delta_{C/H}$  56.5/1.88, C-6;  $\delta_{C/H}$  58.3/2.21, C-14;  $\delta_C$  43.1, C-15) with the two methyls linked to a quaternary carbon ( $\delta_{C/H}$  30.8/0.99, C-19;  $\delta_{C/H}$  18.7/1.08, C-20) in **2**, suggesting the same skeleton of the two compounds, which was further confirmed by  $^1H$ - $^1H$  COSY and HMBC experiments (Figure S3). However, owing to the limited conformation caused by the existence of rigid four-membered ring, the  $^1H$  and  $^{13}C$  NMR of **2** showed numerous wide peaks with weak absorption, which brought great difficulties to determine the plane structure of **2**. After careful NMR data analysis, the 3-methyl-cyclohexanone moiety of **2** was deduced by the clear COSY correlations of H-11/H-12, H-11/H<sub>3</sub>-18 and H-14/H-6, and the well resolved HMBC cross peaks from H<sub>3</sub>-18 ( $\delta_H$  1.02) to C-7/C-11/C-12, from H<sub>2</sub>-12 to C-7 and from H-14 to C-7 (Figure S3). Finally, the substituted 10-membered ring of **2** was inferred by the  $^1H$ - $^1H$  COSY correlations of H-1/H-2 and H-5/H-6, the HMBC cross peaks from H<sub>3</sub>-17 to C-1/C-10 and H<sub>2</sub>-16 to C-3/C-5. However, some 2D signals linked to C-8 and C-9 were missing. The attribution of C-8 and C-9 was supported by the  $^1H$  and  $^{13}C$  NMR data comparison of **1** and **2**.

However, the relative configuration of the five contiguous stereocenters was indistinct because they were heavily overlapped in the NOESY spectra, which made elucidating its stereochemistry a great challenge. Fortunately, we also obtained suitable single crystals of **2** in methanol, which allowed X-ray crystallography using Cu  $K\alpha$  radiation [ $\lambda = 1.54178$  Å, Flack parameter of 0.00 (15)]. Analysis of the X-ray data confirmed the planar structure of **2** as the isomer of **1** with the same planar structure and addressed its absolute configuration as *5S*, *6R*, *7R*, *11S*, *14S* (Figure S2, CCDC 2174244) with comparing the predicted ECD curves with the experimental one (Figure S40).

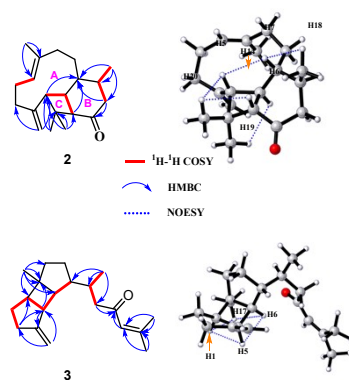

**Figure S4.**  $^1H$ - $^1H$  COSY, key HMBC and NOESY correlations of compounds **2** and **3**.

## 2.4 MS, NMR, IR, CD&UV spectra of compounds 1.

D:\data\...EI202101295-1\_A8-A8-FDA-2-c2 6/4/2021 9:35:02 AM  
 EI202101295-1 A8-A8-FDA-2-c2#13 RT: 2.89  
 T: + c EI Full ms [ 49.50-800.50]  
 m/z = 48-803

| m/z      | Intensity  | Relative | Theo. Mass | Delta (mmu) | RDB equiv. | Composition                                    |
|----------|------------|----------|------------|-------------|------------|------------------------------------------------|
| 69.0332  | 1646629.0  | 2.73     | 69.0335    | -0.30       | 2.5        | C <sub>4</sub> H <sub>5</sub> O <sub>1</sub>   |
| 69.0695  | 2814100.0  | 4.66     | 69.0699    | -0.34       | 1.5        | C <sub>5</sub> H <sub>9</sub>                  |
| 78.0120  | 1682964.0  | 2.79     | 78.0100    | 1.96        | 5.0        | C <sub>5</sub> H <sub>2</sub> O <sub>1</sub>   |
| 79.0180  | 9075712.0  | 15.04    | 79.0178    | 0.16        | 4.5        | C <sub>5</sub> H <sub>3</sub> O <sub>1</sub>   |
| 80.0237  | 1698294.0  | 2.81     | 80.0257    | -2.01       | 4.0        | C <sub>5</sub> H <sub>4</sub> O <sub>1</sub>   |
| 81.0313  | 8289030.0  | 13.74    | 81.0335    | -2.22       | 3.5        | C <sub>5</sub> H <sub>5</sub> O <sub>1</sub>   |
| 93.0701  | 7309204.0  | 12.11    | 93.0699    | 0.26        | 3.5        | C <sub>7</sub> H <sub>9</sub>                  |
| 95.0865  | 3061582.0  | 5.07     | 95.0855    | 1.01        | 2.5        | C <sub>7</sub> H <sub>11</sub>                 |
| 105.0721 | 10868480.0 | 18.01    | 105.0699   | 2.24        | 4.5        | C <sub>8</sub> H <sub>9</sub>                  |
| 106.0785 | 2202853.0  | 3.65     | 106.0777   | 0.80        | 4.0        | C <sub>8</sub> H <sub>10</sub>                 |
| 107.0883 | 5306386.0  | 8.79     | 107.0855   | 2.76        | 3.5        | C <sub>8</sub> H <sub>11</sub>                 |
| 115.0554 | 1589200.0  | 2.63     | 115.0542   | 1.12        | 6.5        | C <sub>9</sub> H <sub>7</sub>                  |
| 117.0704 | 3996664.0  | 6.62     | 117.0699   | 0.55        | 5.5        | C <sub>9</sub> H <sub>9</sub>                  |
| 118.0777 | 2136393.0  | 3.54     | 118.0777   | 0.02        | 5.0        | C <sub>9</sub> H <sub>10</sub>                 |
| 119.0853 | 10064384.0 | 16.68    | 119.0855   | -0.25       | 4.5        | C <sub>9</sub> H <sub>11</sub>                 |
| 120.0930 | 6108131.0  | 10.12    | 120.0934   | -0.30       | 4.0        | C <sub>9</sub> H <sub>12</sub>                 |
| 121.1007 | 7985961.0  | 13.23    | 121.1012   | -0.49       | 3.5        | C <sub>9</sub> H <sub>13</sub>                 |
| 123.0801 | 1564719.0  | 2.59     | 123.0804   | -0.31       | 3.5        | C <sub>8</sub> H <sub>11</sub> O <sub>1</sub>  |
| 125.0962 | 15427072.0 | 25.57    | 125.0961   | 0.09        | 2.5        | C <sub>8</sub> H <sub>13</sub> O <sub>1</sub>  |
| 129.0694 | 1492762.0  | 2.47     | 129.0699   | -0.44       | 6.5        | C <sub>10</sub> H <sub>9</sub>                 |
| 131.0855 | 6107389.0  | 10.12    | 131.0855   | -0.04       | 5.5        | C <sub>10</sub> H <sub>11</sub>                |
| 132.0929 | 3590741.0  | 5.95     | 132.0934   | -0.42       | 5.0        | C <sub>10</sub> H <sub>12</sub>                |
| 133.1014 | 5459539.0  | 9.05     | 133.1012   | 0.21        | 4.5        | C <sub>10</sub> H <sub>13</sub>                |
| 143.0851 | 1448049.0  | 2.40     | 143.0855   | -0.40       | 6.5        | C <sub>11</sub> H <sub>11</sub>                |
| 145.1007 | 5978835.0  | 9.91     | 145.1012   | -0.45       | 5.5        | C <sub>11</sub> H <sub>13</sub>                |
| 146.1077 | 3203297.0  | 5.31     | 146.1090   | -1.29       | 5.0        | C <sub>11</sub> H <sub>14</sub>                |
| 147.1162 | 2735399.0  | 4.53     | 147.1168   | -0.59       | 4.5        | C <sub>11</sub> H <sub>15</sub>                |
| 157.1016 | 2403602.0  | 3.98     | 157.1012   | 0.43        | 6.5        | C <sub>12</sub> H <sub>13</sub>                |
| 159.1152 | 15476224.0 | 25.65    | 159.1168   | -1.60       | 5.5        | C <sub>12</sub> H <sub>15</sub>                |
| 160.1217 | 5436722.0  | 9.01     | 160.1247   | -2.99       | 5.0        | C <sub>12</sub> H <sub>16</sub>                |
| 161.1307 | 4749389.0  | 7.87     | 161.1325   | -1.79       | 4.5        | C <sub>12</sub> H <sub>17</sub>                |
| 171.1169 | 1644549.0  | 2.73     | 171.1168   | 0.11        | 6.5        | C <sub>13</sub> H <sub>15</sub>                |
| 173.1325 | 16312064.0 | 27.03    | 173.1325   | 0.03        | 5.5        | C <sub>13</sub> H <sub>17</sub>                |
| 186.1404 | 4328759.0  | 7.17     | 186.1403   | 0.13        | 6.0        | C <sub>14</sub> H <sub>18</sub>                |
| 187.1475 | 2684833.0  | 4.45     | 187.1481   | -0.63       | 5.5        | C <sub>14</sub> H <sub>19</sub>                |
| 188.1566 | 60343808.0 | 100.00   | 188.1560   | 0.61        | 5.0        | C <sub>14</sub> H <sub>20</sub>                |
| 230.1662 | 2252528.0  | 3.73     | 230.1665   | -0.33       | 6.0        | C <sub>16</sub> H <sub>22</sub> O <sub>1</sub> |
| 243.1747 | 1478947.0  | 2.45     | 243.1743   | 0.32        | 6.5        | C <sub>17</sub> H <sub>23</sub> O <sub>1</sub> |
| 253.1956 | 2696539.0  | 4.47     | 253.1951   | 0.54        | 7.5        | C <sub>19</sub> H <sub>25</sub>                |
| 271.2054 | 5544034.0  | 9.19     | 271.2056   | -0.23       | 6.5        | C <sub>19</sub> H <sub>27</sub> O <sub>1</sub> |
| 286.2297 | 1412338.0  | 2.34     | 286.2291   | 0.54        | 6.0        | C <sub>20</sub> H <sub>30</sub> O <sub>1</sub> |

Figure S5. HREIMS spectrum of sinuastone A (**1**).

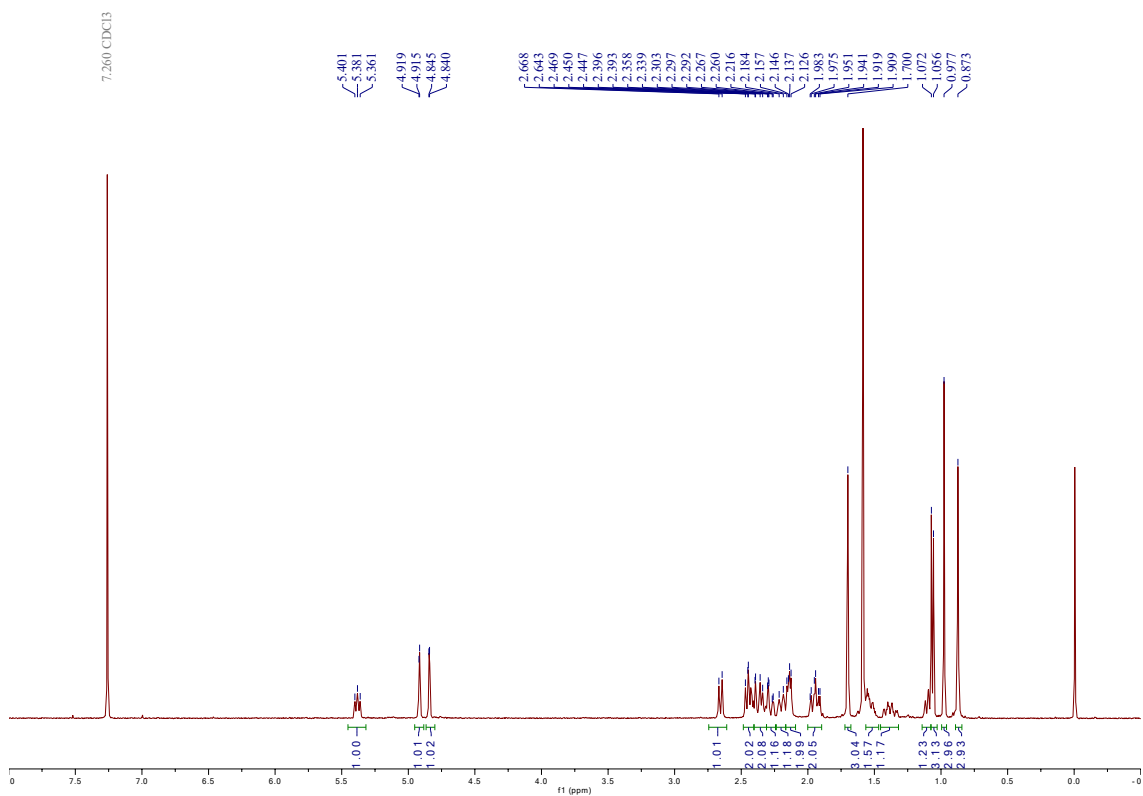

Figure S6. <sup>1</sup>H NMR spectrum (600 MHz) of sinuastone A (**1**) in CDCl<sub>3</sub>.

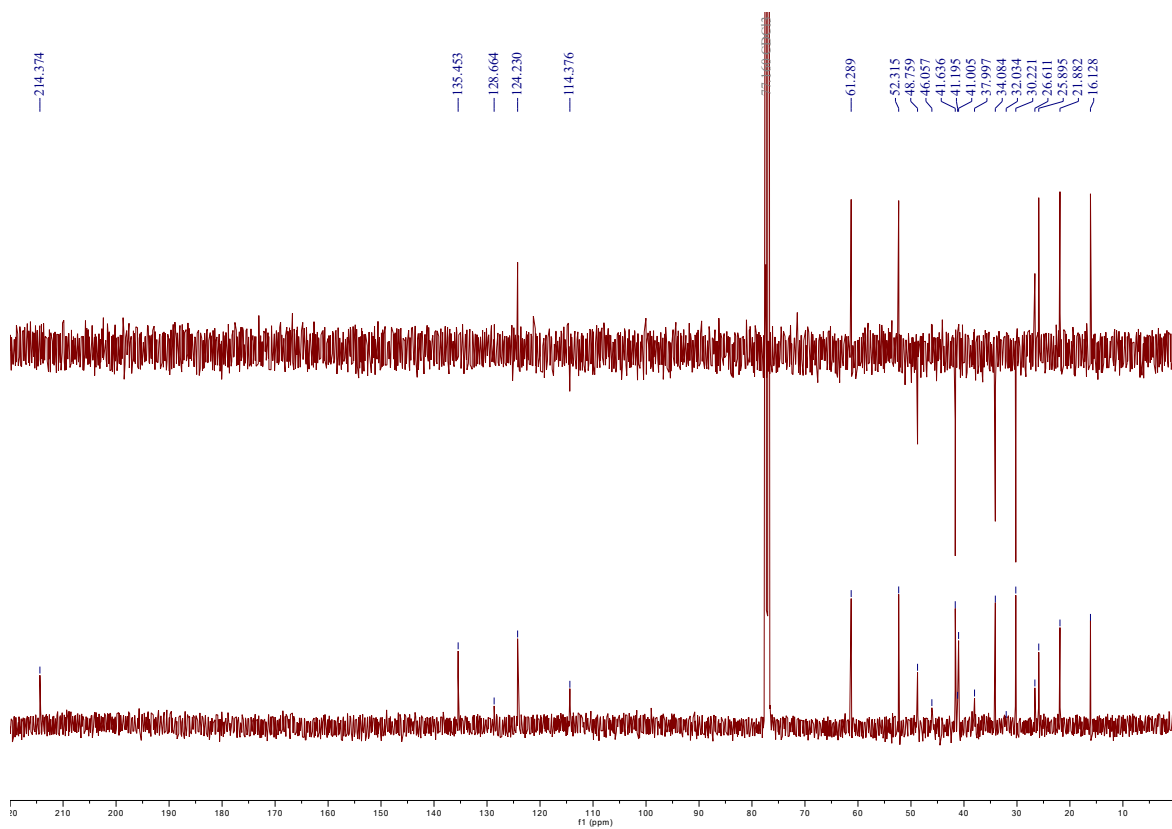

**Figure S7.**  $^{13}\text{C}$  NMR spectrum (125 MHz) of sinuaustone A (**1**) in  $\text{CDCl}_3$ .

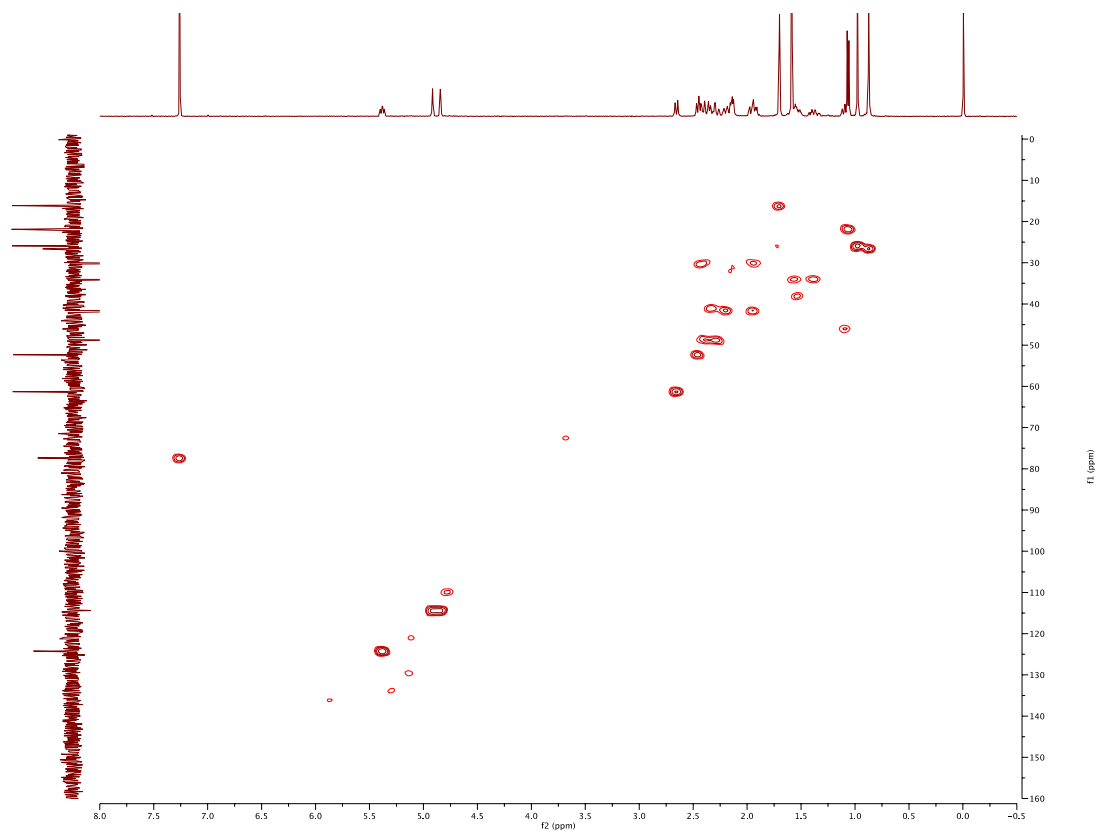

**Figure S8.** HSQC spectrum (500 MHz) of sinuaustone A (**1**) in  $\text{CDCl}_3$ .



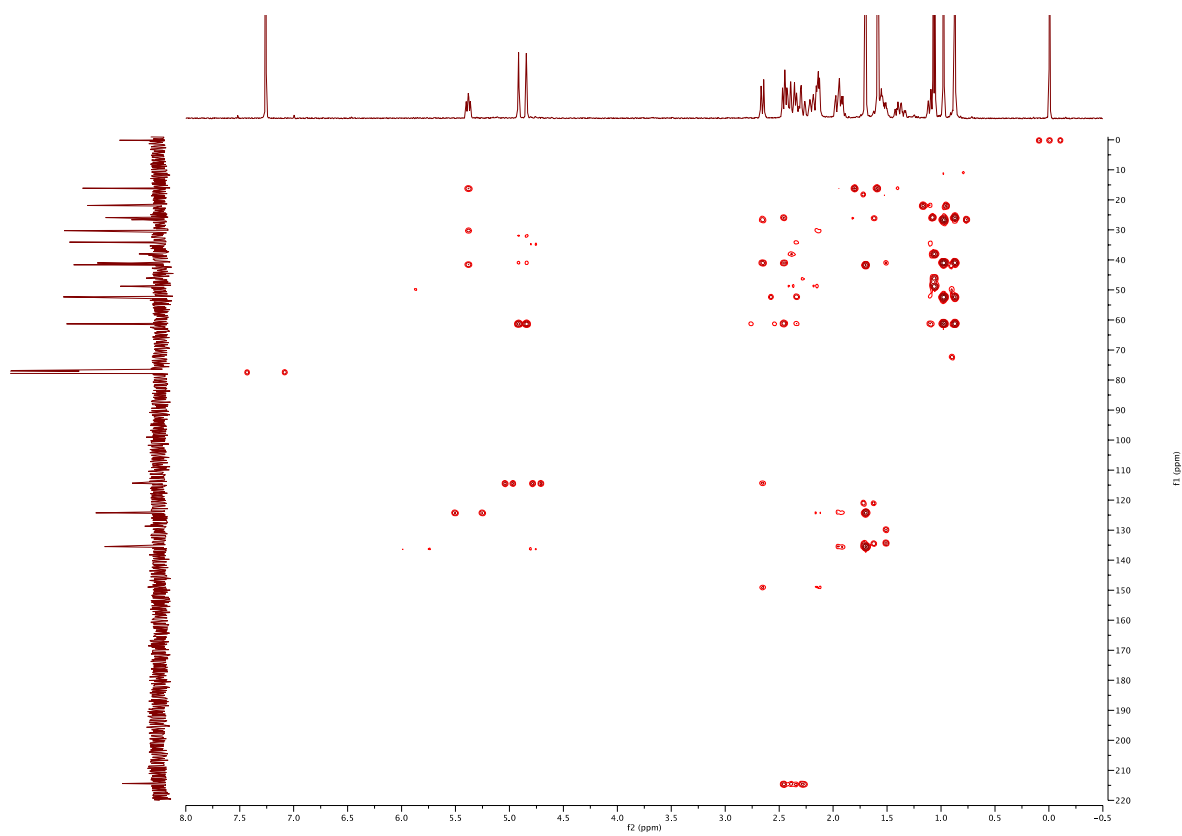

Figure S9. HMBC spectrum (500 MHz) of sinuaustone A (**1**) in CDCl<sub>3</sub>.

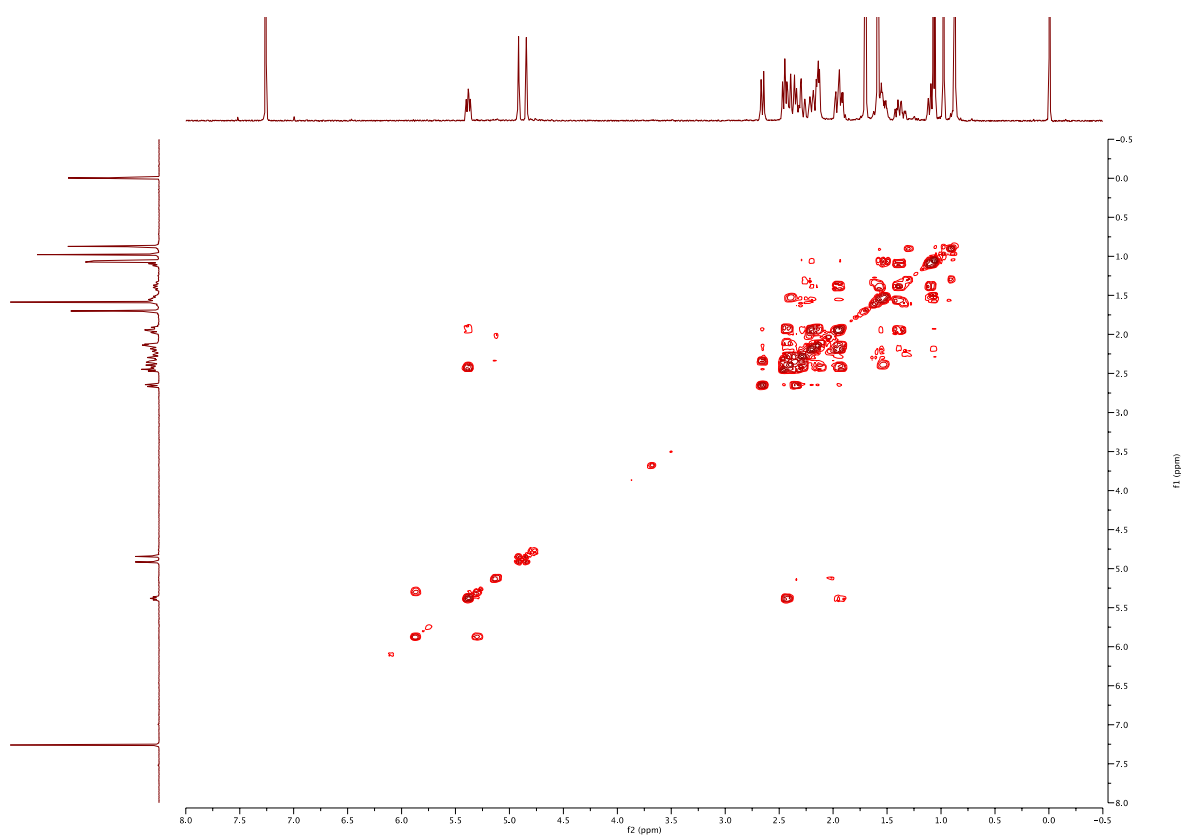

Figure S10. <sup>1</sup>H-<sup>1</sup>H COSY spectrum (500 MHz) of sinuaustone A (**1**) in CDCl<sub>3</sub>.

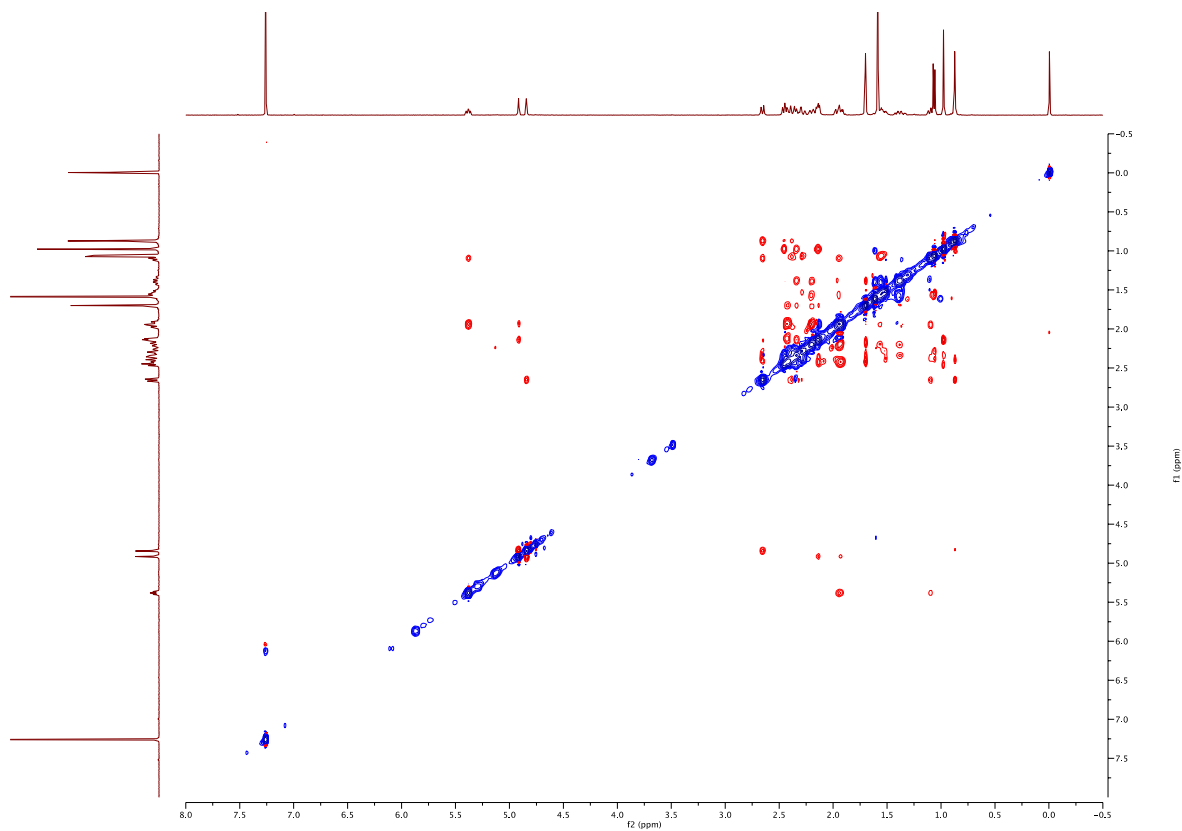

Figure S11. NOESY spectrum (500 MHz) of sinuaustone A (**1**) in  $\text{CDCl}_3$ .

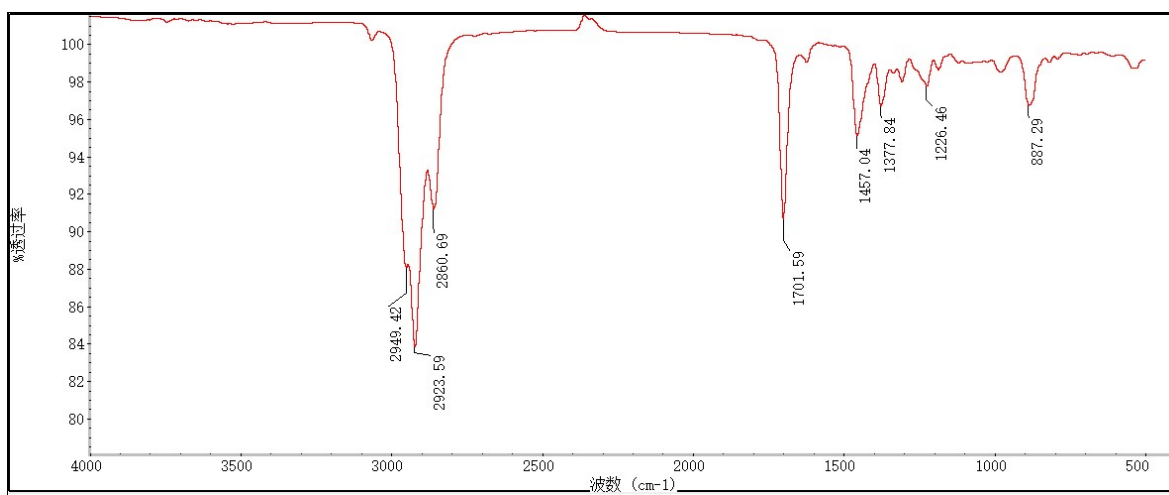

Figure S12. IR spectrum of sinuaustone A (**1**).

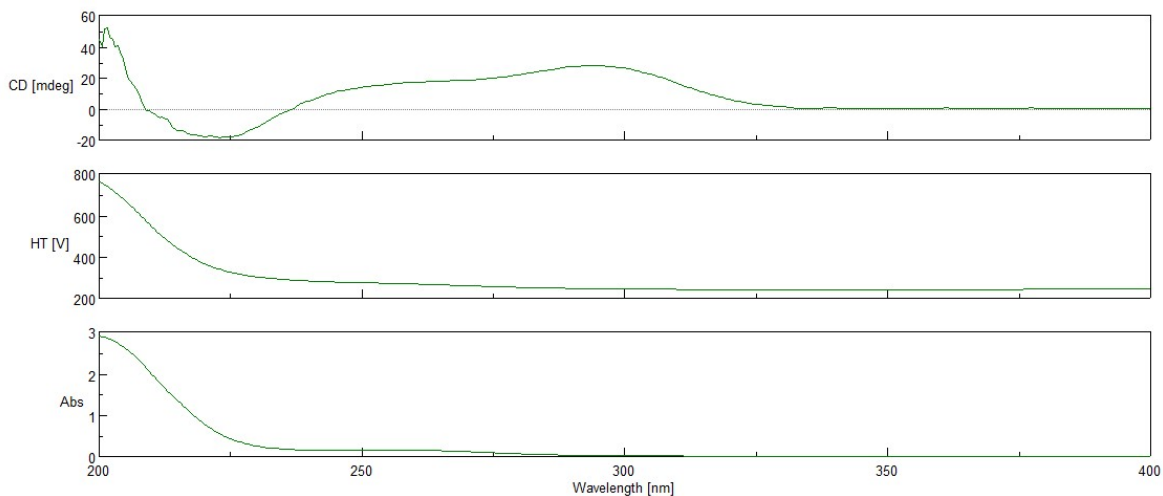

Figure S13. CD&UV spectrum of sinuaustone A (1).

## 2.5 MS, NMR, IR, CD&UV spectra of compounds 2.

D:\data\2021EI\202101474\_A8-10FDA-4-c1 8/17/2021 2:02:45 PM

EI202101474 A8-10FDA-4-c1#5 RT: 0.83  
T: + c EI Full ms [ 49.50-800.50]  
m/z= 48-803

| m/z      | Intensity  | Relative | Theo. Mass | Delta (mmu) | RDB equiv. | Composition                                    |
|----------|------------|----------|------------|-------------|------------|------------------------------------------------|
| 52.9992  | 7817345.0  | 6.60     | 53.0022    | -3.00       | 3.5        | C <sub>3</sub> H <sub>1</sub> O <sub>1</sub>   |
| 81.0308  | 14909440.0 | 12.59    | 81.0335    | -2.69       | 3.5        | C <sub>5</sub> H <sub>5</sub> O <sub>1</sub>   |
| 119.0863 | 22624000.0 | 19.11    | 119.0855   | 0.81        | 4.5        | C <sub>9</sub> H <sub>11</sub>                 |
| 131.0861 | 14881536.0 | 12.57    | 131.0855   | 0.53        | 5.5        | C <sub>10</sub> H <sub>11</sub>                |
| 132.0945 | 8011756.0  | 6.77     | 132.0934   | 1.11        | 5.0        | C <sub>10</sub> H <sub>12</sub>                |
| 143.0851 | 3307385.0  | 2.79     | 143.0855   | -0.40       | 6.5        | C <sub>11</sub> H <sub>11</sub>                |
| 229.1602 | 3016846.0  | 2.55     | 229.1587   | 1.52        | 6.5        | C <sub>16</sub> H <sub>21</sub> O <sub>1</sub> |
| 230.1665 | 7530822.0  | 6.36     | 230.1665   | 0.02        | 6.0        | C <sub>16</sub> H <sub>22</sub> O <sub>1</sub> |
| 231.1724 | 3230276.0  | 2.73     | 231.1743   | -1.90       | 5.5        | C <sub>16</sub> H <sub>23</sub> O <sub>1</sub> |
| 243.1737 | 3124541.0  | 2.64     | 243.1743   | -0.66       | 6.5        | C <sub>17</sub> H <sub>23</sub> O <sub>1</sub> |
| 253.1947 | 18896640.0 | 15.96    | 253.1951   | -0.36       | 7.5        | C <sub>19</sub> H <sub>25</sub>                |
| 271.2057 | 12158208.0 | 10.27    | 271.2056   | 0.09        | 6.5        | C <sub>19</sub> H <sub>27</sub> O <sub>1</sub> |
| 286.2291 | 3205409.0  | 2.71     | 286.2291   | -0.03       | 6.0        | C <sub>20</sub> H <sub>30</sub> O <sub>1</sub> |

Figure S14. HREIMS spectrum of sinuaustone B (2).

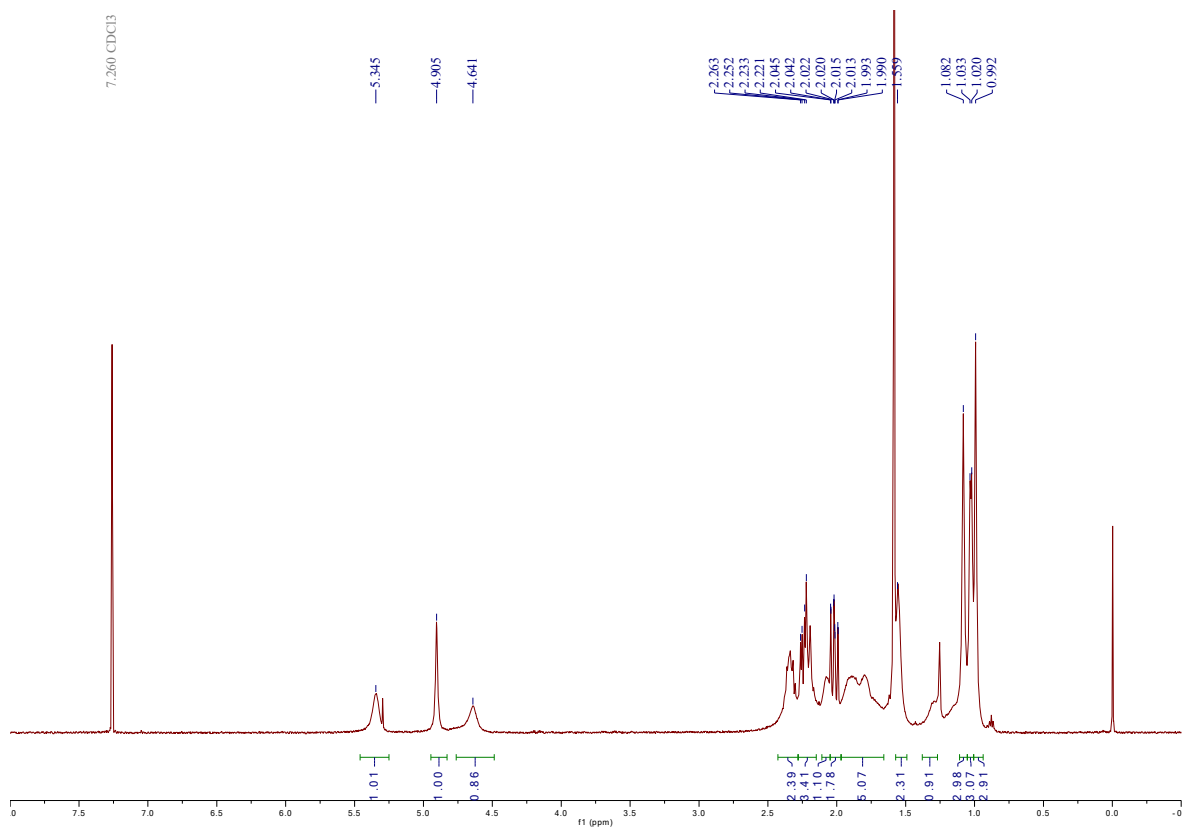

Figure S15. <sup>1</sup>H NMR spectrum (600 MHz) of sinuaustone B (**2**) in CDCl<sub>3</sub>.

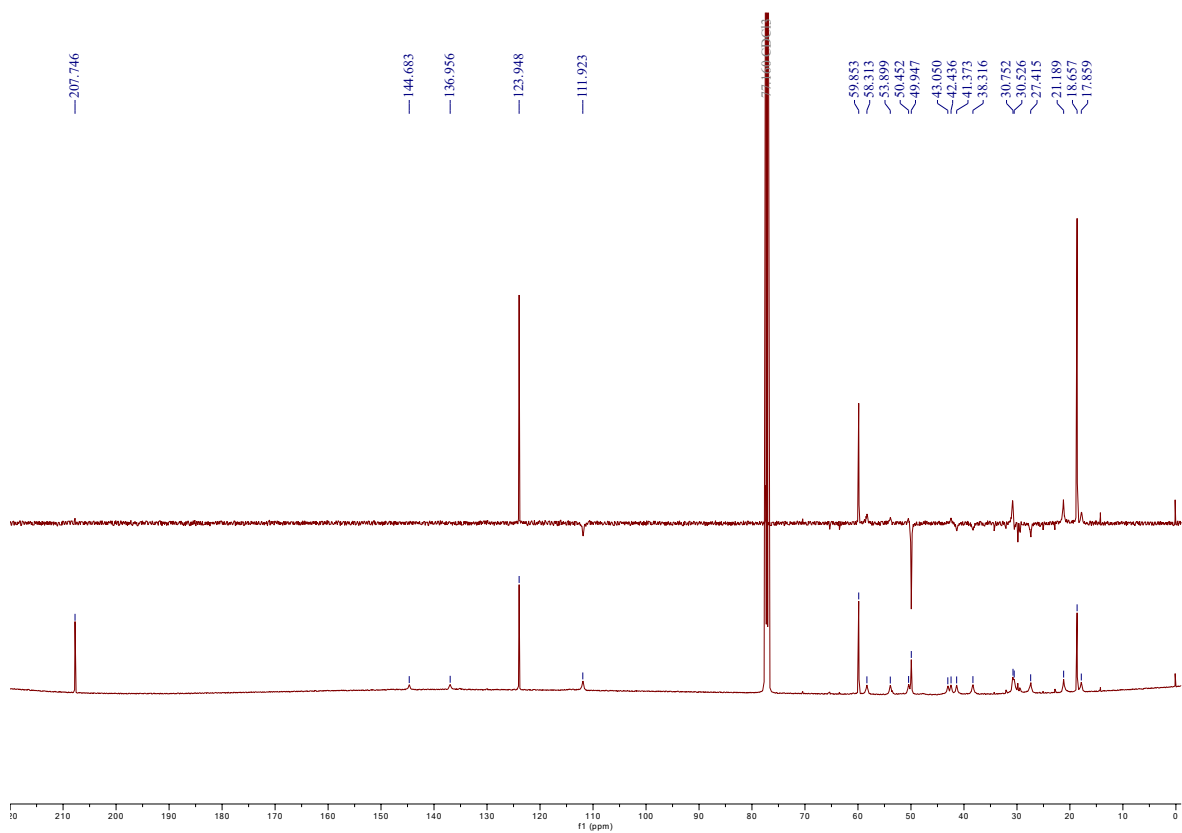

Figure S16. <sup>13</sup>C NMR spectrum (125 MHz) of sinuaustone B (**2**) in CDCl<sub>3</sub>.

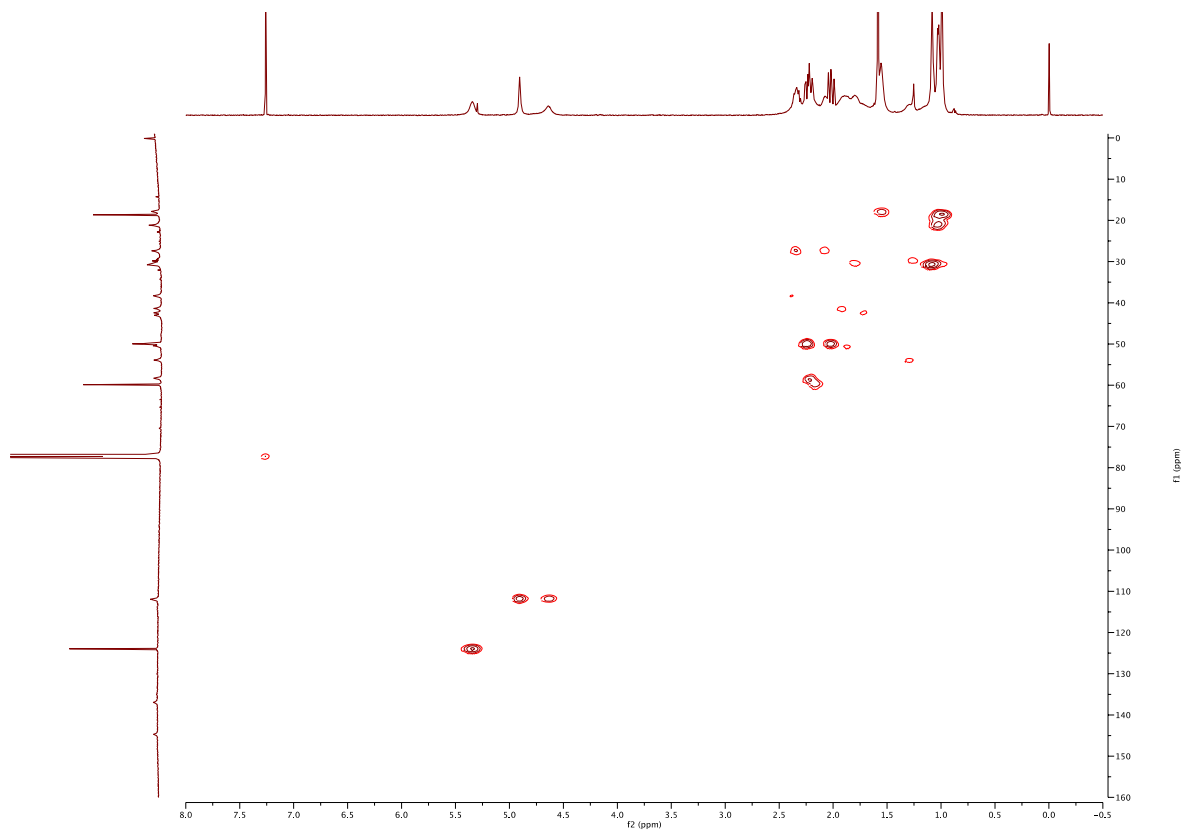

Figure S17. HSQC spectrum (500 MHz) of sinuaustone B (**2**) in  $\text{CDCl}_3$ .

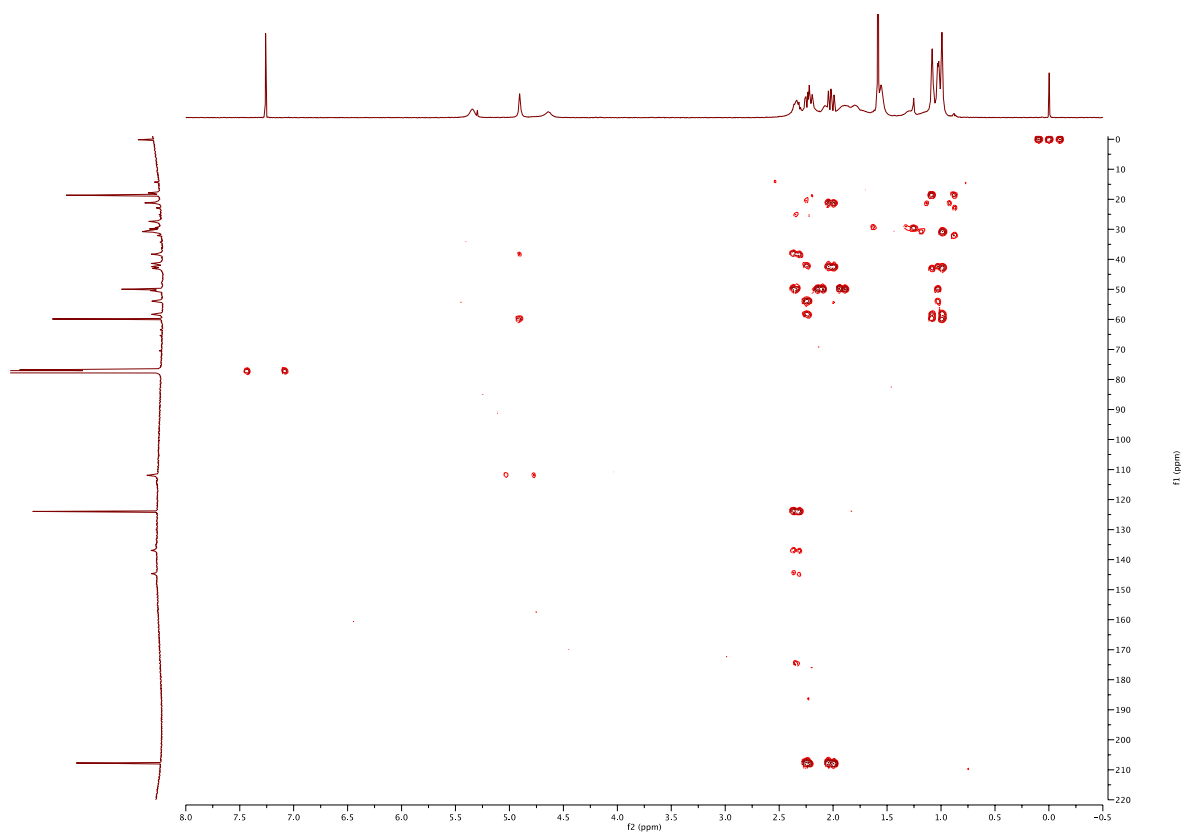

Figure S18. HMBC spectrum (500 MHz) of sinuaustone B (**2**) in  $\text{CDCl}_3$ .

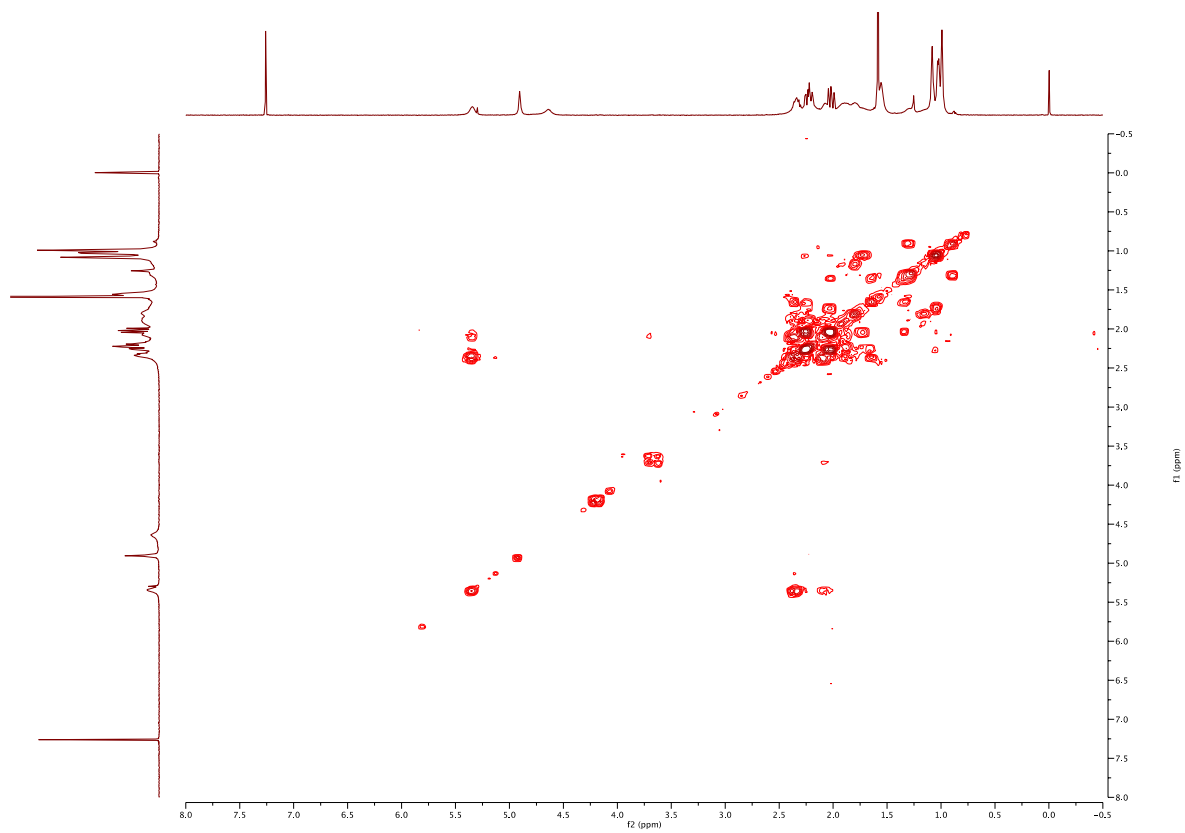

**Figure S19.** <sup>1</sup>H-<sup>1</sup>H COSY spectrum (500 MHz) of sinuaustone B (**2**) in CDCl<sub>3</sub>.

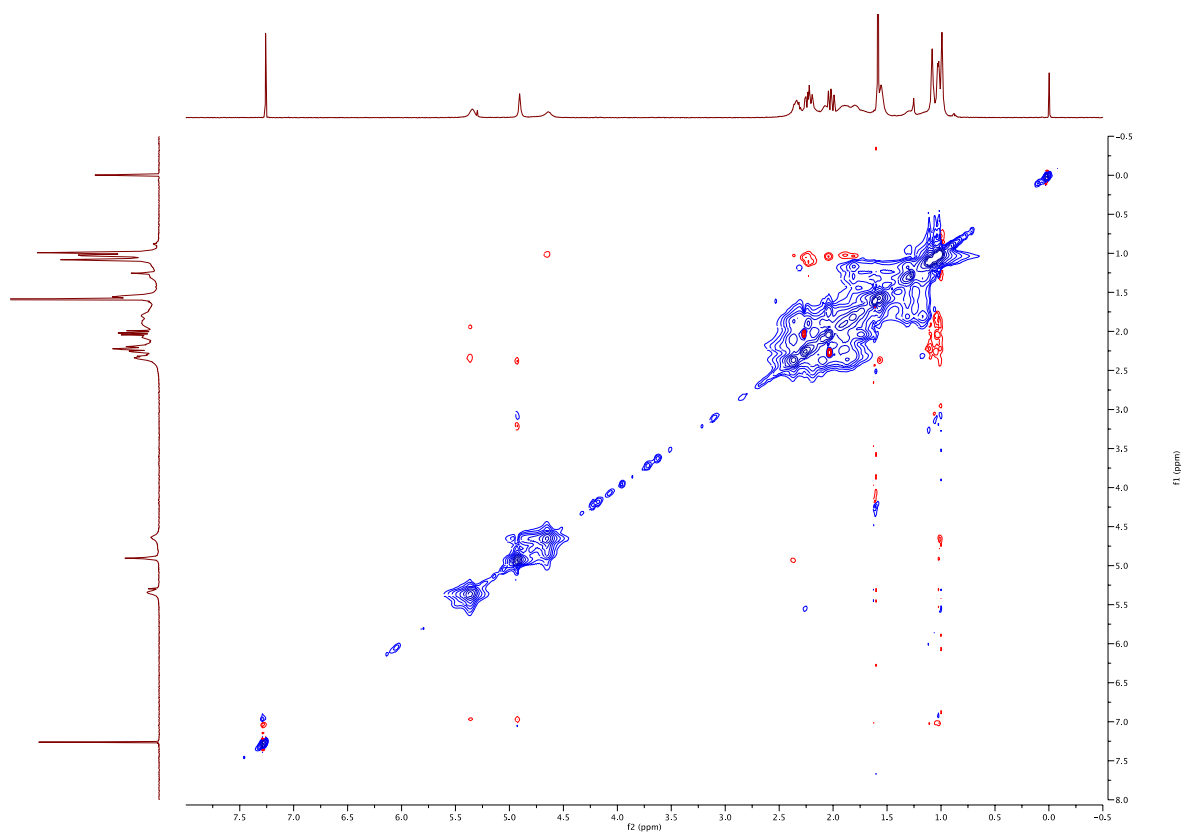

**Figure S20.** NOESY spectrum (500 MHz) of sinuaustone B (**2**) in CDCl<sub>3</sub>.

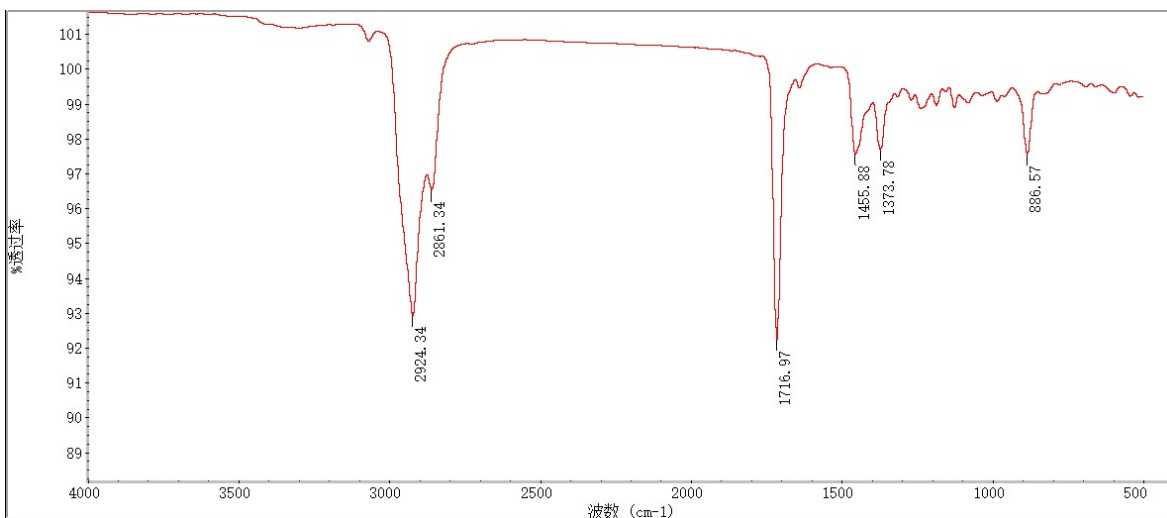

Figure S21. IR spectrum of sinuastone B (2).

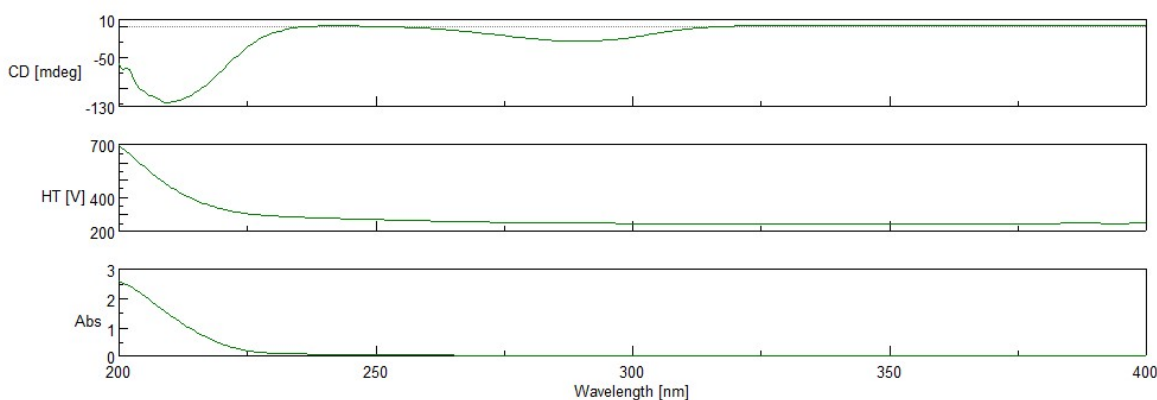

Figure S22. CD&UV spectrum of sinuastone B (2).

## 2.6 MS, NMR, IR, CD&UV spectra of compounds 3

D:\msw\2021\02\01\087\_A8-EB16-4-1-c1 5/31/2021 1:39:13 PM

EI202101287\_A8-EB16-4-1-c1#13 RT: 2.48  
T: + c RT Full.ms ( 49.30-800.50)  
m/z= 48-803

| m/z      | Intensity | Relative | Theo.    | Delta | RDB    | Composition                                    |
|----------|-----------|----------|----------|-------|--------|------------------------------------------------|
|          |           |          | (amu)    | (amu) | equiv. |                                                |
| 79.0542  | 104028.0  | 1.26     | 79.0542  | -0.04 | 3.5    | C <sub>6</sub> H <sub>7</sub>                  |
| 80.0622  | 76644.0   | 0.93     | 80.0621  | 0.11  | 3.0    | C <sub>6</sub> H <sub>8</sub>                  |
| 81.0696  | 162952.0  | 1.97     | 81.0699  | -0.30 | 2.5    | C <sub>6</sub> H <sub>9</sub>                  |
| 83.0490  | 286129.0  | 3.45     | 83.0491  | -0.10 | 2.5    | C <sub>5</sub> H <sub>7</sub> O <sub>1</sub>   |
| 91.0541  | 89367.0   | 1.08     | 91.0542  | -0.15 | 4.5    | C <sub>7</sub> H <sub>7</sub>                  |
| 93.0699  | 93069.0   | 1.00     | 93.0699  | -0.01 | 3.5    | C <sub>7</sub> H <sub>9</sub>                  |
| 105.0725 | 77817.0   | 0.94     | 105.0699 | 2.67  | 4.5    | C <sub>8</sub> H <sub>9</sub>                  |
| 125.0955 | 81718.0   | 0.99     | 125.0961 | -0.57 | 2.5    | C <sub>8</sub> H <sub>13</sub> O <sub>1</sub>  |
| 159.1149 | 92325.0   | 1.11     | 159.1168 | -1.96 | 5.5    | C <sub>12</sub> H <sub>15</sub>                |
| 173.1329 | 165757.0  | 2.00     | 173.1325 | 0.37  | 5.5    | C <sub>13</sub> H <sub>17</sub>                |
| 186.1405 | 225752.0  | 2.73     | 186.1403 | 0.23  | 6.0    | C <sub>14</sub> H <sub>19</sub>                |
| 187.1452 | 94212.0   | 1.14     | 187.1481 | -2.89 | 5.5    | C <sub>14</sub> H <sub>19</sub>                |
| 188.1559 | 827537.0  | 9.99     | 188.1560 | -0.01 | 5.0    | C <sub>14</sub> H <sub>20</sub>                |
| 191.1436 | 103875.0  | 1.25     | 191.1430 | 0.52  | 4.5    | C <sub>13</sub> H <sub>19</sub> O <sub>1</sub> |
| 203.1439 | 130392.0  | 1.57     | 203.1430 | 0.86  | 5.5    | C <sub>14</sub> H <sub>19</sub> O <sub>1</sub> |
| 203.1802 | 233860.0  | 2.82     | 203.1794 | 0.80  | 4.5    | C <sub>15</sub> H <sub>23</sub>                |
| 204.1516 | 141382.0  | 1.71     | 204.1509 | 0.77  | 5.0    | C <sub>14</sub> H <sub>20</sub> O <sub>1</sub> |
| 205.1595 | 8282439.0 | 100.00   | 205.1587 | 0.79  | 4.5    | C <sub>14</sub> H <sub>21</sub> O <sub>1</sub> |
| 207.1730 | 688093.0  | 8.31     | 207.1743 | -1.37 | 3.5    | C <sub>14</sub> H <sub>21</sub> O <sub>1</sub> |
| 211.1506 | 308031.0  | 3.72     | 211.1481 | 2.51  | 7.5    | C <sub>16</sub> H <sub>19</sub>                |
| 212.1358 | 282037.0  | 3.38     | 212.1360 | -0.15 | 7.0    | C <sub>16</sub> H <sub>20</sub>                |
| 213.1645 | 415681.0  | 5.02     | 213.1638 | 0.74  | 6.5    | C <sub>16</sub> H <sub>21</sub>                |
| 214.1691 | 119556.0  | 1.44     | 214.1716 | -2.48 | 6.0    | C <sub>16</sub> H <sub>22</sub>                |
| 215.1439 | 121570.0  | 1.47     | 215.1430 | 0.83  | 6.5    | C <sub>15</sub> H <sub>19</sub> O <sub>1</sub> |
| 215.1779 | 112136.0  | 1.35     | 215.1794 | -1.52 | 5.5    | C <sub>16</sub> H <sub>23</sub>                |
| 217.1583 | 145308.0  | 1.75     | 217.1587 | -0.39 | 5.5    | C <sub>15</sub> H <sub>21</sub> O <sub>1</sub> |
| 225.1634 | 328031.0  | 3.96     | 225.1638 | -0.36 | 7.5    | C <sub>17</sub> H <sub>21</sub>                |
| 226.1691 | 132611.0  | 1.60     | 226.1716 | -0.19 | 7.0    | C <sub>17</sub> H <sub>22</sub>                |
| 227.1789 | 125446.0  | 1.51     | 227.1794 | -0.54 | 6.5    | C <sub>17</sub> H <sub>23</sub>                |
| 229.1594 | 122080.0  | 1.47     | 229.1587 | 0.70  | 6.5    | C <sub>16</sub> H <sub>21</sub> O <sub>1</sub> |
| 230.1658 | 89393.0   | 1.08     | 230.1665 | -0.67 | 6.0    | C <sub>16</sub> H <sub>22</sub> O <sub>1</sub> |
| 231.1743 | 252677.0  | 3.05     | 231.1743 | -0.05 | 5.5    | C <sub>16</sub> H <sub>23</sub> O <sub>1</sub> |
| 253.1940 | 246022.0  | 2.97     | 253.1951 | -1.12 | 7.5    | C <sub>19</sub> H <sub>25</sub>                |
| 268.2179 | 88883.0   | 1.07     | 268.2186 | -0.70 | 7.0    | C <sub>20</sub> H <sub>29</sub>                |
| 271.2047 | 396915.0  | 4.79     | 271.2056 | -0.91 | 6.5    | C <sub>19</sub> H <sub>27</sub> O <sub>1</sub> |
| 286.2287 | 176823.0  | 2.13     | 286.2291 | -0.37 | 6.0    | C <sub>20</sub> H <sub>30</sub> O <sub>1</sub> |

Figure S23. HREIMS spectrum of isolobophytumin E (3).

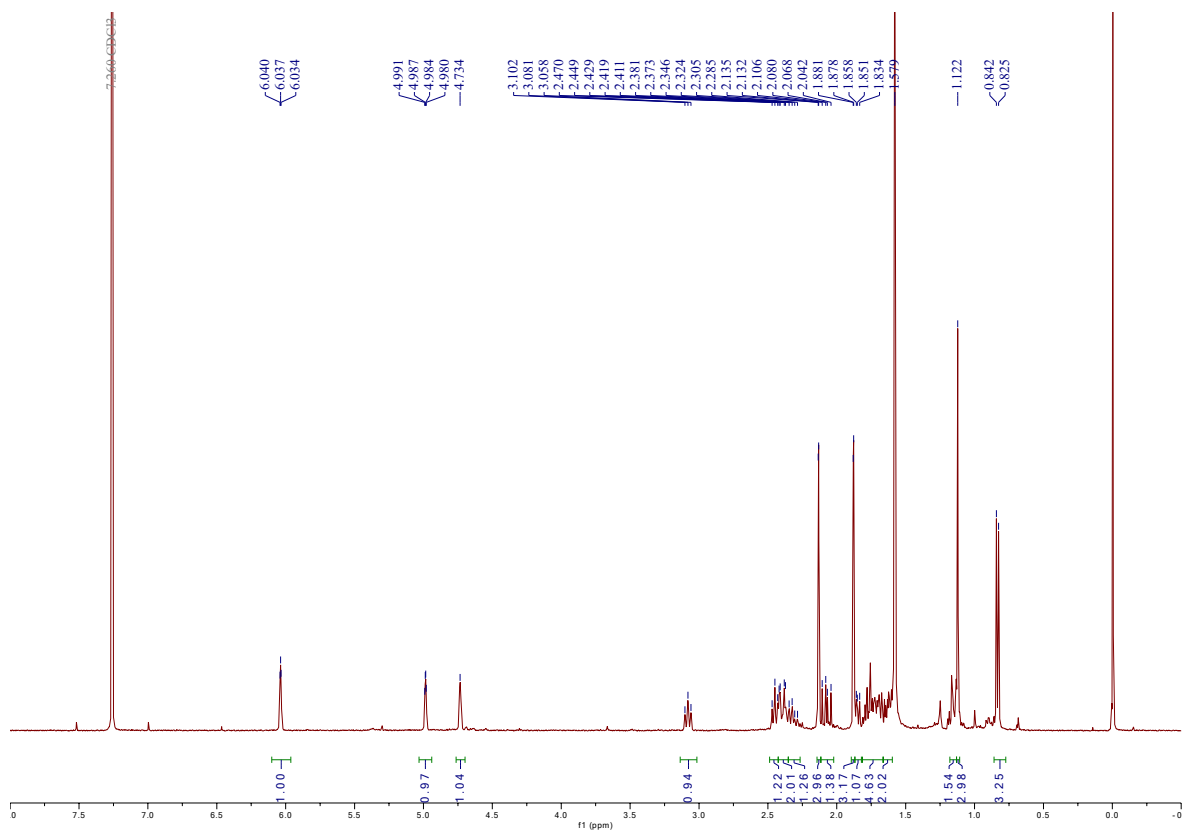

Figure S24.  $^1\text{H}$  NMR spectrum (600 MHz) of isolobophytumin E (**3**) in  $\text{CDCl}_3$ .

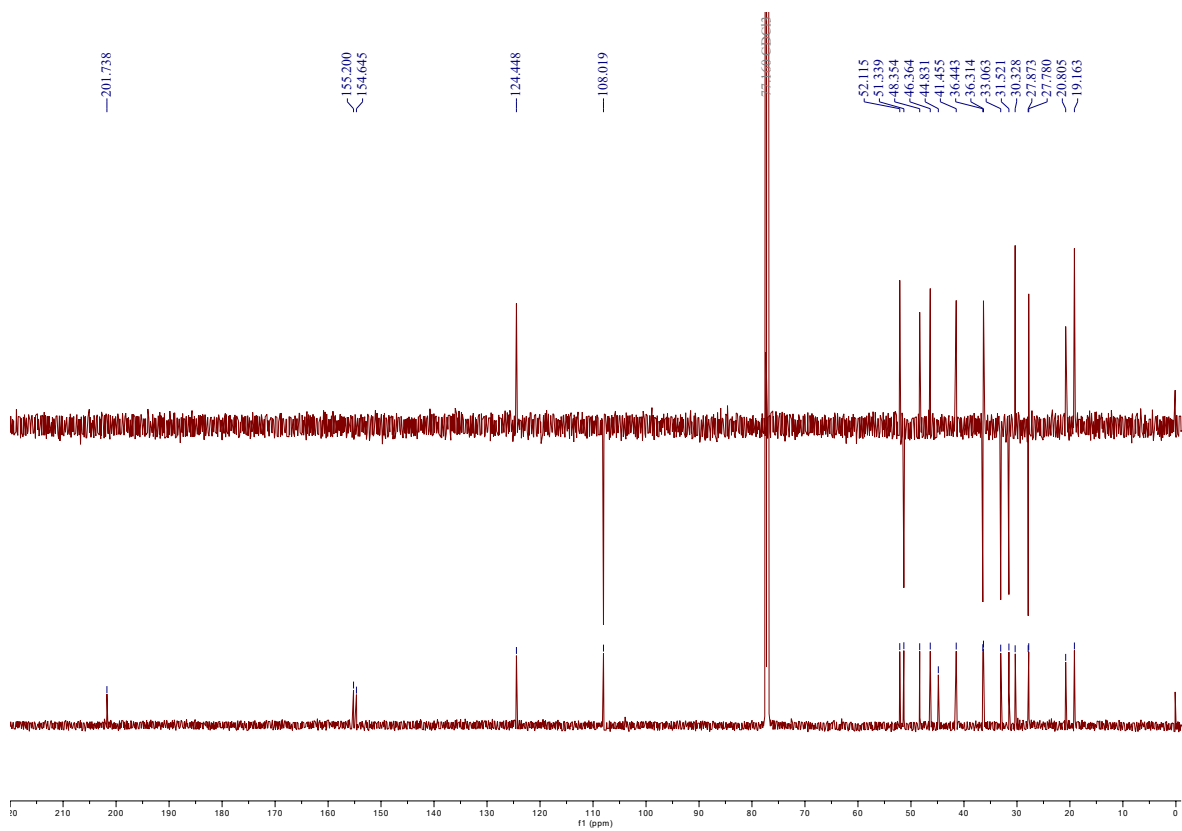

Figure S25.  $^{13}\text{C}$  NMR spectrum (125 MHz) of isolobophytumin E (**3**) in  $\text{CDCl}_3$ .



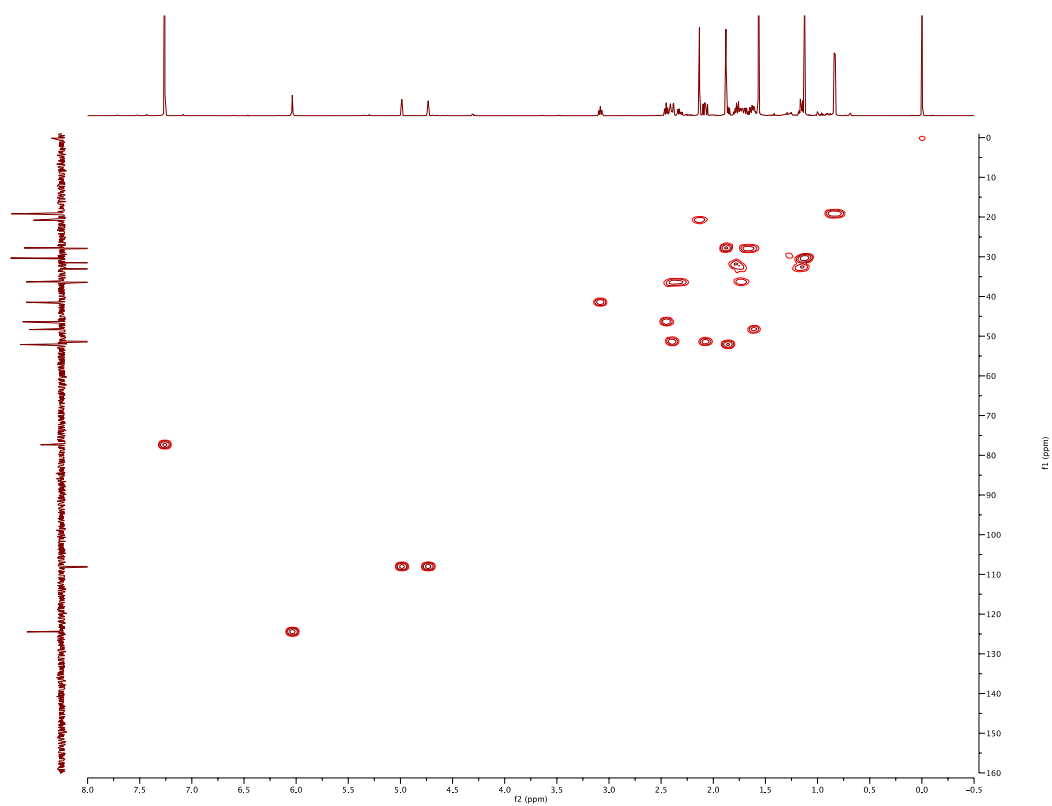

Figure S26. HSQC spectrum (500 MHz) of isolobophytumin E (**3**) in  $\text{CDCl}_3$ .

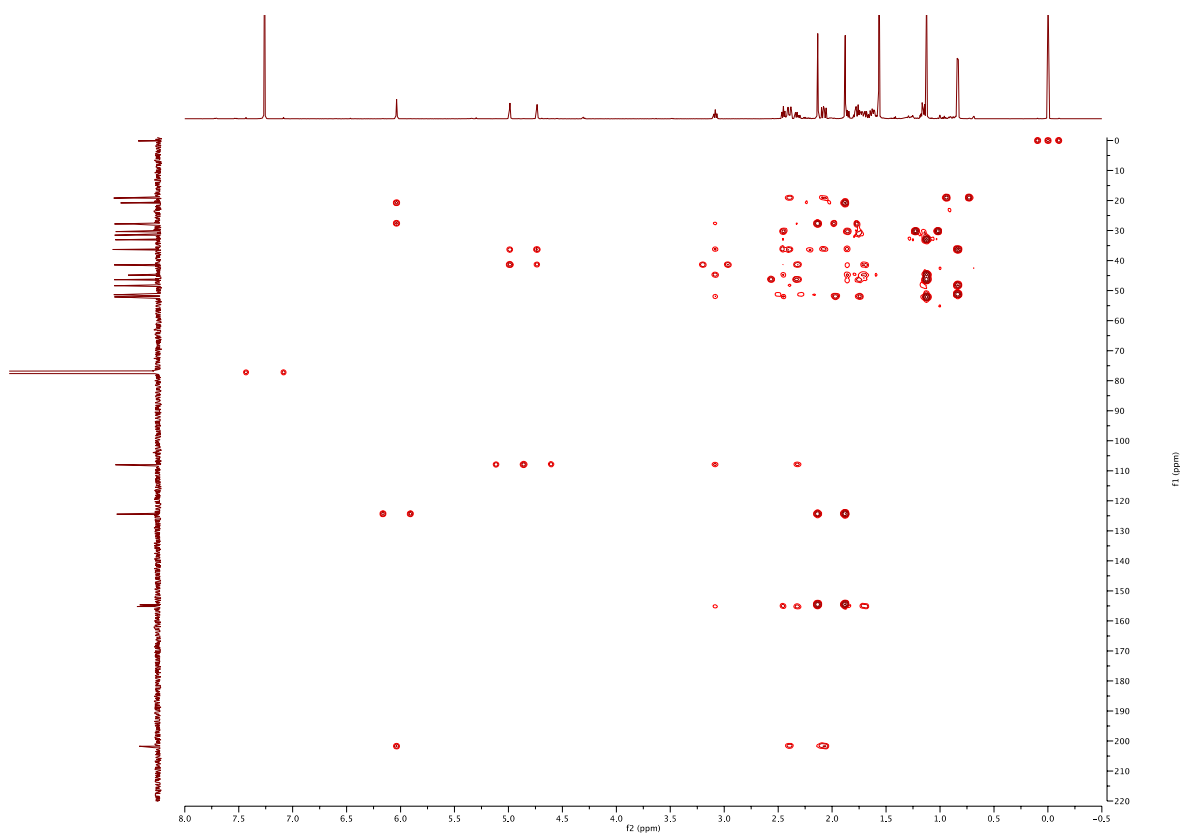

Figure S27. HMBC spectrum (500 MHz) of isolobophytumin E (**3**) in  $\text{CDCl}_3$ .

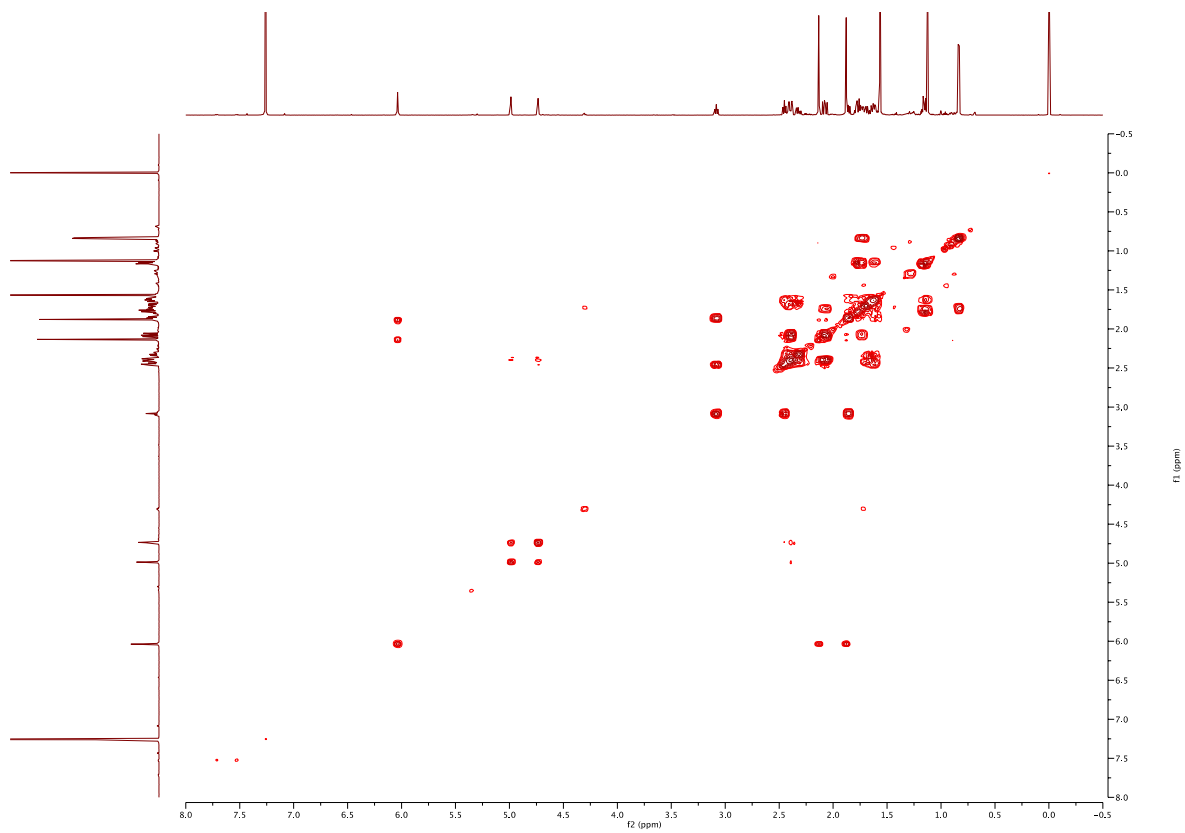

**Figure S28.**  $^1\text{H}$ - $^1\text{H}$  COSY spectrum (500 MHz) of isolobophytumin E (**3**) in  $\text{CDCl}_3$ .

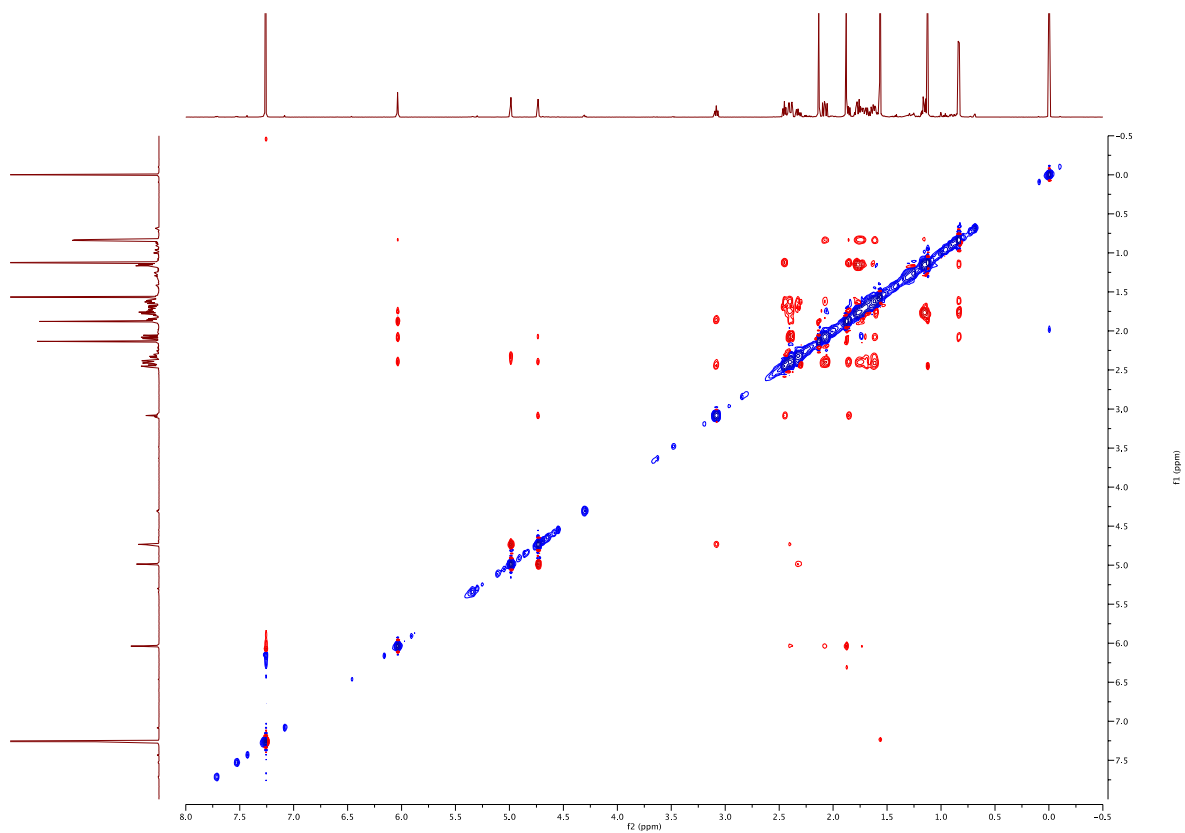

**Figure S29.** NOESY spectrum (500 MHz) of isolobophytumin E (**3**) in  $\text{CDCl}_3$ .

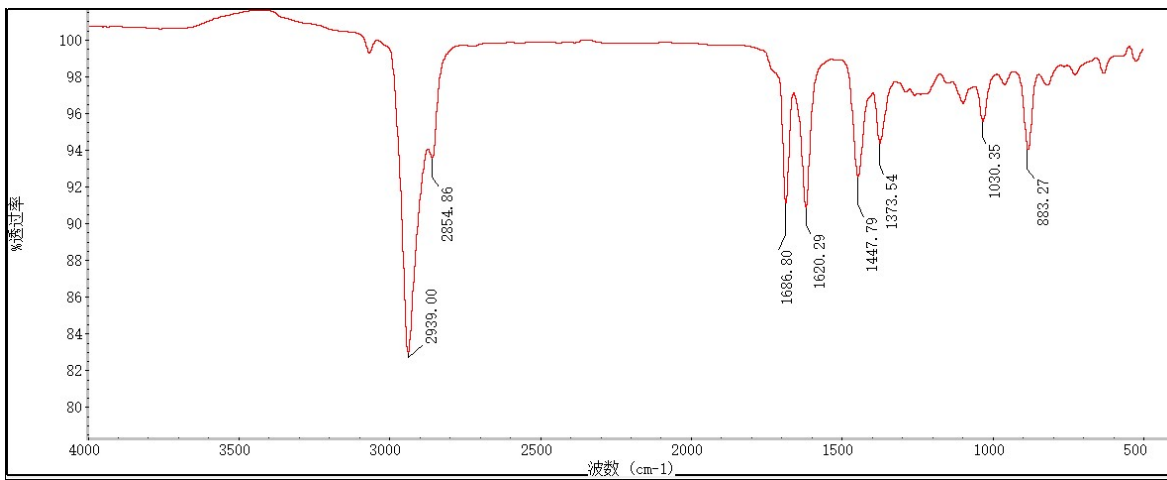

Figure S30. IR spectrum of isolobophytumin E (3).

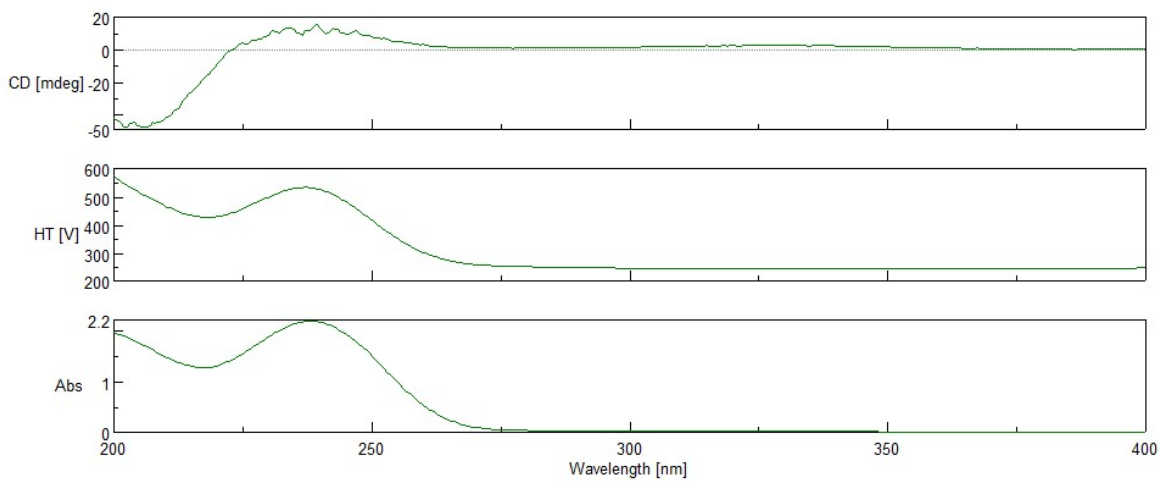

Figure S31. CD&UV spectrum of isolobophytumin E (3).

## 2.7 MS, NMR spectra of compounds 4

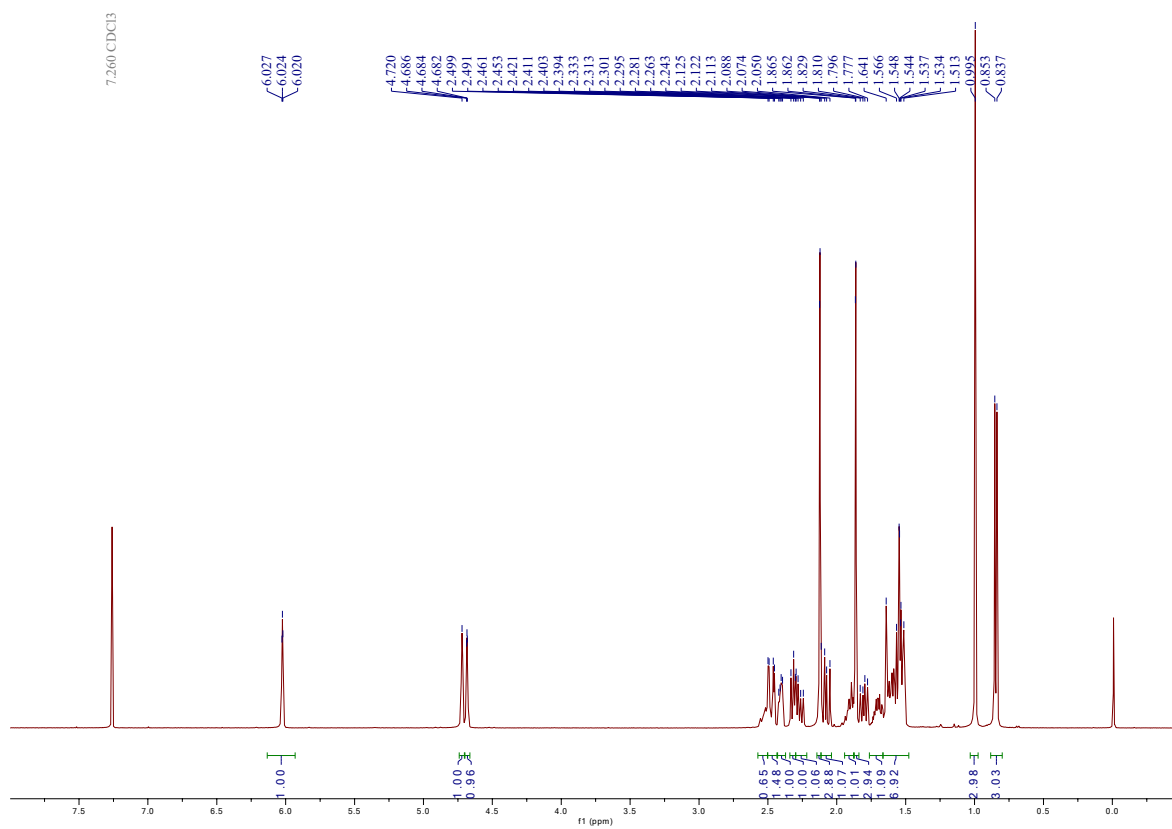

Figure S32. <sup>1</sup>H NMR spectrum (600 MHz) of lobophytumin E (4) in CDCl<sub>3</sub>.

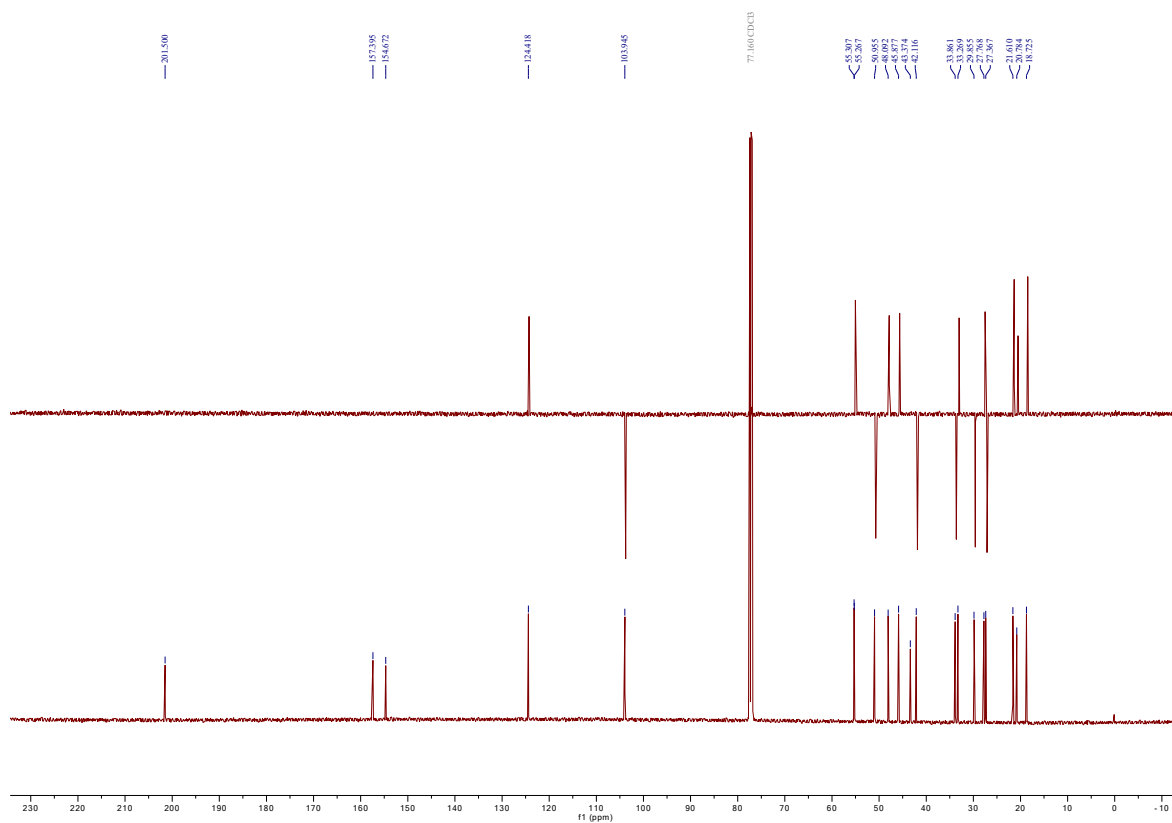

Figure S33. <sup>13</sup>C NMR spectrum (125 MHz) of lobophytumin E (4) in CDCl<sub>3</sub>.

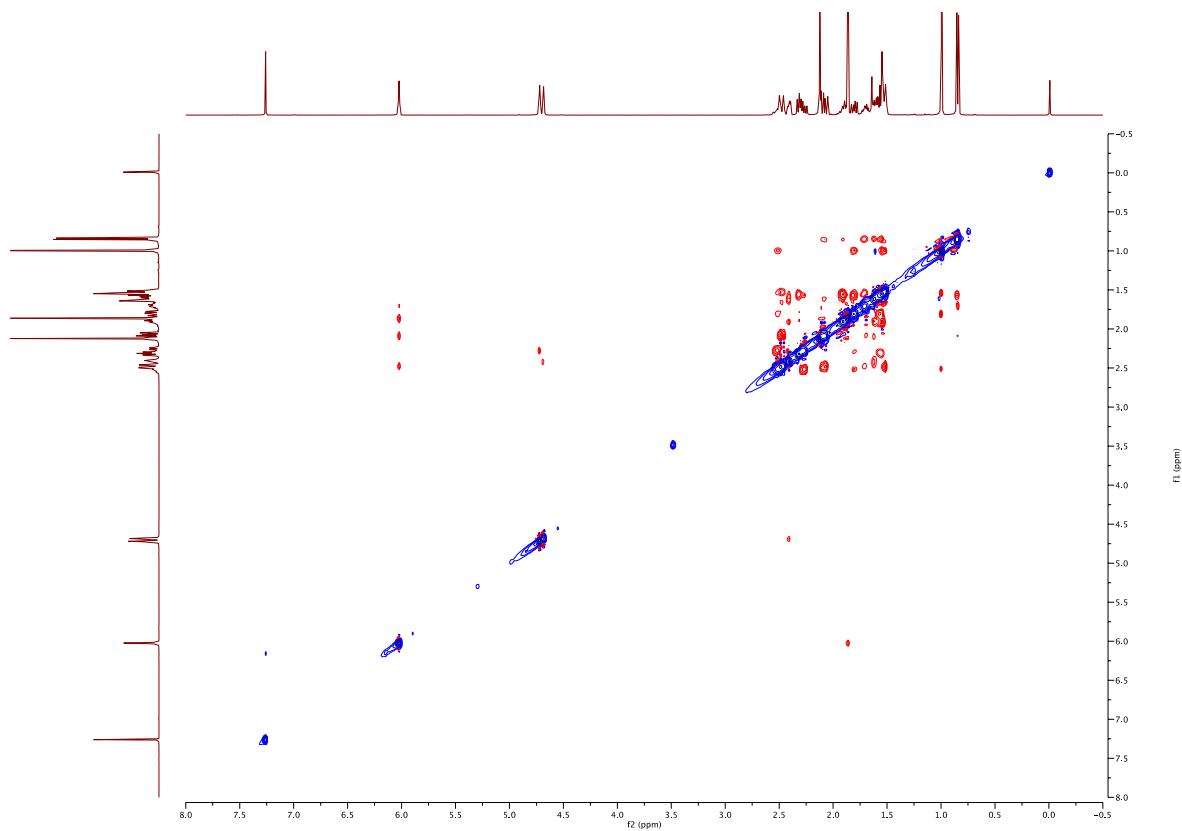

Figure S34. NOESY spectrum (500 MHz) of lobophytumin E (**4**) in  $\text{CDCl}_3$ .

## 2.8 MS, NMR spectra of compounds **5**

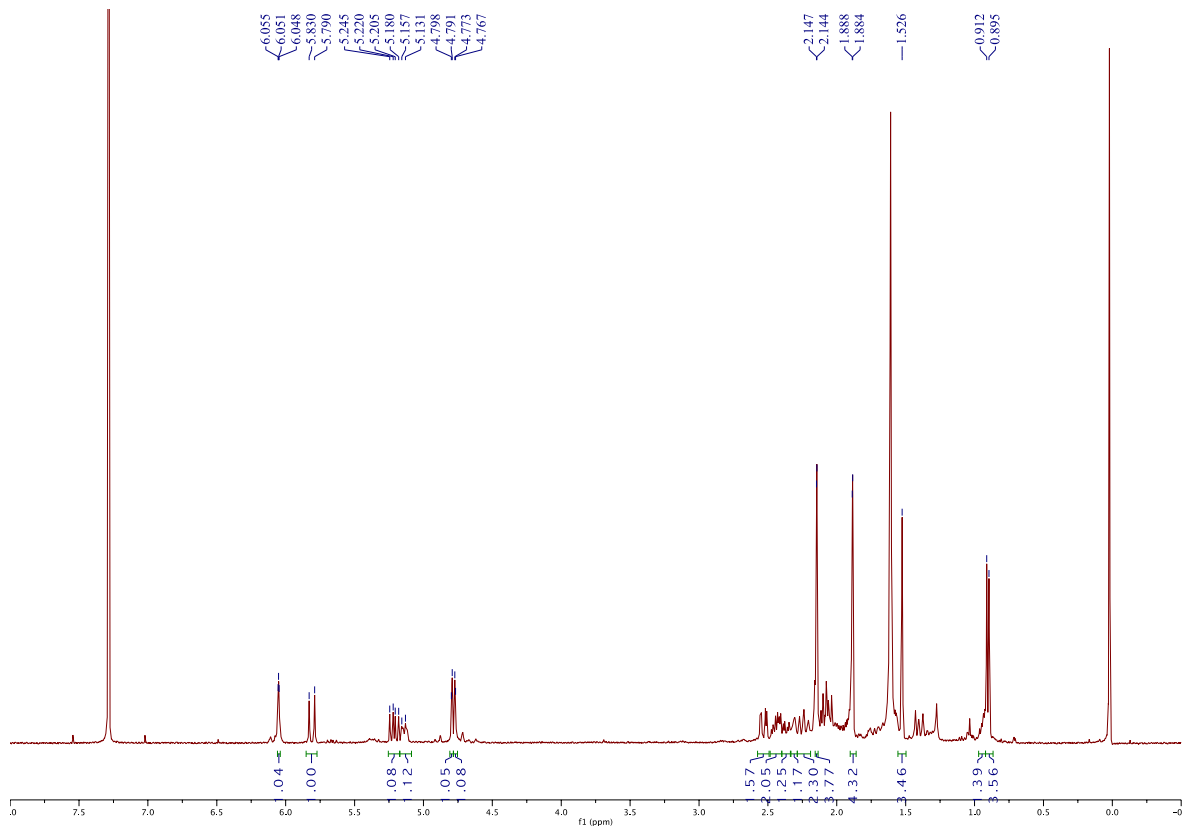

Figure S35.  $^1\text{H}$  NMR spectrum (600 MHz) of lobophytumin A (**5**) in  $\text{CDCl}_3$ .

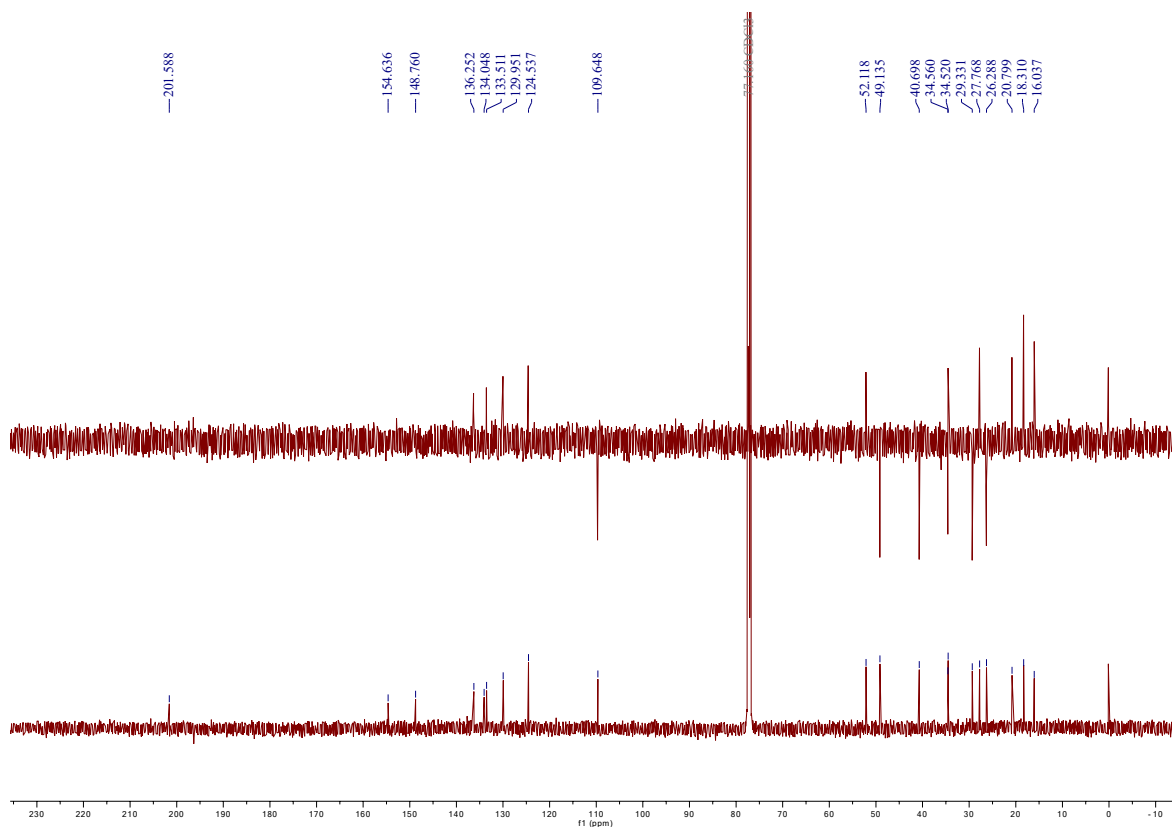

**Figure S36.**  $^{13}\text{C}$  NMR spectrum (125 MHz) of lobophytumin A (**5**) in  $\text{CDCl}_3$ .

### 3. Computational Section

#### 3.1 QM-NMR calculation for compounds **3**

Theoretical calculation of all theoretical stereoisomers was carried out to determine the relative configuration at C-11 of **3**, based on the alignment of its 1D NMR chemical shifts ( $^{13}\text{C}$  NMR chemical shifts herein) and calculation-generated chemical shifts. Confab was used to search the conformational space of **3a–3b**. Conformational searches were carried out using the torsional sampling (MCMM) method and OPLS\_2005 force field in the MacroModel 9.9.223 software applying an energy window of 21 kJ/mol. Conformers above 1% population were re-optimized with Gaussian 09 at the B3LYP/6-311G(d,p) level with IEFPCM (Polarizable Continuum Model using the Integral Equation Formalism variant) solvent model for acetonitrile. The initial torsional sampling (MCMM) and OPLS\_2005 force field conformational searches of **3a–3b**, afforded 125 and 48 conformers within the 21 kJ/mol energy window. The Boltzmann populations of the conformers were obtained based on the potential energy provided by the OPLS\_2005 force field, leading to 15 and 11 conformers above 1% population for further re-optimization, respectively. The obtained conformers were subjected to optimization and frequency calculations on B3LYP/6-311G(d,p) ( $\text{CHCl}_3$ ) level of theory. GIAO DFT  $^{13}\text{C}$  NMR calculations were calculated on mPW1PW91/6-31G\* ( $\text{CHCl}_3$ ) level of theory, and the calculated shielding tensors were Boltzmann averaged according to Gibbs free energy and then converted into chemical shifts following MSTD protocol.[4-8] The experimental  $^{13}\text{C}$  NMR data of **3** were compared with the calculated NMR chemical shifts of **3a–3b** using the correlation coefficient ( $R^2$ ), and DP4+ probability analysis.

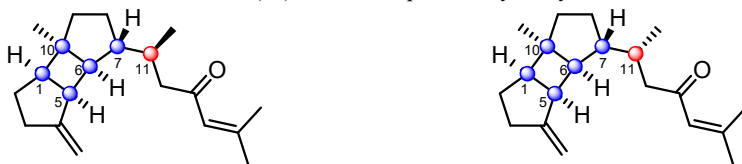

**3a** 1R\*,5S\*,6S\*,7R\*,10R\*,11S\*

**3b** 1R\*,5S\*,6S\*,7R\*,10R\*,11R\*

**Figure S37.** Structures of two possible C-11 epimeric structures **3a** and **3b**.

**Table S4.** Cartesian coordinates of all conformers of isomers **3a–3b** used after optimization at the B3LYP/6-311G(d,p) level of theory as required for DP4+ analysis.

|                                    |         |         |         |        |         |         |         |         |         |         |         |
|------------------------------------|---------|---------|---------|--------|---------|---------|---------|---------|---------|---------|---------|
| <b>3a-conf.1</b> Imaginary Freq =0 | C       | -3.1858 | -1.7423 | 0.2819 | C       | -2.7729 | -3.1349 | -1.6478 |         |         |         |
| C                                  | -4.4088 | -1.6255 | -0.5861 | C      | -2.0769 | -2.4598 | -0.4335 | C       | -4.2716 | -2.8378 | -1.5183 |

|                                    |         |         |         |                                    |         |         |         |                                    |         |         |         |
|------------------------------------|---------|---------|---------|------------------------------------|---------|---------|---------|------------------------------------|---------|---------|---------|
| C                                  | -1.8736 | -2.3162 | -2.6084 | C                                  | -3.7290 | -0.5157 | 1.2147  | C                                  | -0.0123 | -0.8825 | -0.7568 |
| C                                  | -1.1443 | -1.6789 | -1.3893 | C                                  | -1.0396 | -3.7337 | -2.7407 | C                                  | 0.4707  | 0.4852  | -0.2405 |
| C                                  | -1.2640 | -0.1535 | -1.5171 | H                                  | -0.4126 | -2.3135 | -0.7270 | C                                  | -0.0857 | -1.8914 | 0.4079  |
| C                                  | -1.5511 | 0.0393  | -3.0186 | H                                  | -3.1258 | -4.1374 | -1.2598 | C                                  | 1.2610  | -2.1395 | 1.0736  |
| C                                  | -2.4516 | -1.1415 | -3.4048 | H                                  | -2.3379 | -2.8838 | 0.6498  | C                                  | 1.2925  | -2.0251 | 2.5484  |
| C                                  | -3.1074 | -1.2875 | 1.5387  | C                                  | 0.0788  | 0.3361  | -0.8165 | O                                  | 2.2244  | -2.4420 | 0.4065  |
| C                                  | -0.9513 | -3.1986 | -3.4605 | C                                  | 0.2102  | 1.7877  | -1.3200 | C                                  | 2.3489  | -1.5844 | 3.2556  |
| H                                  | -0.0902 | -2.0362 | -1.3623 | C                                  | 0.0328  | 0.3449  | 0.7274  | C                                  | 2.2962  | -1.5264 | 4.7660  |
| H                                  | -2.5561 | -4.2288 | -1.7089 | C                                  | 0.3499  | -0.9793 | 1.4101  | C                                  | 3.6575  | -1.1094 | 2.6686  |
| H                                  | -1.5366 | -3.1884 | 0.2153  | C                                  | 1.6334  | -1.6116 | 1.0314  | H                                  | -2.1257 | -0.4155 | -0.7118 |
| C                                  | -0.0358 | 0.6437  | -1.0219 | O                                  | -0.3896 | -1.4286 | 2.2557  | H                                  | -4.4424 | -0.2235 | -0.9638 |
| C                                  | -0.2647 | 2.1565  | -1.2159 | C                                  | 1.8617  | -2.9375 | 1.0053  | H                                  | -5.8041 | -1.2137 | -0.3160 |
| C                                  | 0.2958  | 0.3707  | 0.4616  | C                                  | 3.2151  | -3.4763 | 0.5980  | H                                  | -5.9695 | -2.5252 | -2.2992 |
| C                                  | 1.0719  | -0.9136 | 0.7246  | C                                  | 0.8547  | -4.0134 | 1.3387  | H                                  | -5.4980 | -0.9801 | -3.0745 |
| C                                  | 0.6349  | -1.7112 | 1.8911  | H                                  | -2.0561 | 0.2462  | -1.1802 | H                                  | -1.4428 | 1.2870  | -2.3164 |
| O                                  | 2.0154  | -1.2151 | 0.0293  | H                                  | -4.3215 | -0.3093 | -1.7412 | H                                  | -0.5102 | 0.0698  | -3.2808 |
| C                                  | 0.7164  | -3.0513 | 1.9805  | H                                  | -5.6769 | -0.8793 | -0.6967 | H                                  | -2.6589 | 0.2256  | -4.4663 |
| C                                  | 0.2409  | -3.7677 | 3.2247  | H                                  | -5.2750 | -3.1772 | -1.1889 | H                                  | -3.5625 | 0.2586  | -2.9234 |
| C                                  | 1.2467  | -3.9753 | 0.9091  | H                                  | -4.8244 | -2.5058 | -2.7884 | H                                  | -2.9077 | -3.2313 | 1.1854  |
| H                                  | -2.1566 | 0.2005  | -0.9532 | H                                  | -1.3216 | 0.5494  | -3.4858 | H                                  | -4.2794 | -2.0217 | 1.6535  |
| H                                  | -4.3671 | -0.6661 | -1.1482 | H                                  | -0.0693 | -0.7452 | -3.3070 | H                                  | -1.0967 | -1.8809 | -4.9088 |
| H                                  | -5.3574 | -1.6422 | 0.0003  | H                                  | -1.9209 | -1.9094 | -4.3982 | H                                  | -1.9528 | -3.4240 | -4.5740 |
| H                                  | -4.7469 | -3.7135 | -1.0144 | H                                  | -3.1228 | -1.0677 | -3.3800 | H                                  | -2.7747 | -2.1331 | -5.5199 |
| H                                  | -4.7833 | -2.7128 | -2.5006 | H                                  | -2.9804 | -0.6420 | 2.0116  | H                                  | 0.7310  | -1.2510 | -1.5051 |
| H                                  | -2.0374 | 1.0163  | -3.2500 | H                                  | -4.5392 | 0.2116  | 1.3800  | H                                  | 1.4513  | 0.4062  | 0.2817  |
| H                                  | -0.5977 | -0.0247 | -3.5945 | H                                  | -0.0727 | -3.3606 | -3.1489 | H                                  | 0.6156  | 1.2125  | -1.0709 |
| H                                  | -2.4528 | -1.3277 | -4.5041 | H                                  | -0.8015 | -4.4327 | -1.9064 | H                                  | -0.2600 | 0.9238  | 0.4768  |
| H                                  | -3.4990 | -0.9093 | -3.1188 | H                                  | -1.5501 | -4.3195 | -3.5384 | H                                  | -0.8249 | -1.5230 | 1.1560  |
| H                                  | -2.1910 | -1.4168 | 2.1334  | H                                  | 0.9939  | -0.2085 | -1.1509 | H                                  | -0.4487 | -2.8809 | 0.0462  |
| H                                  | -3.9593 | -0.7743 | 2.0114  | H                                  | 1.1011  | 2.2928  | -0.8807 | H                                  | 0.3714  | -2.3056 | 3.0845  |
| H                                  | -0.1732 | -2.5874 | -3.9719 | H                                  | 0.3392  | 1.8374  | -2.4246 | H                                  | 2.4220  | -0.4770 | 5.1166  |
| H                                  | -0.4244 | -3.9672 | -2.8496 | H                                  | -0.6884 | 2.3889  | -1.0509 | H                                  | 1.3351  | -1.9046 | 5.1828  |
| H                                  | -1.5416 | -3.7316 | -4.2400 | H                                  | 0.7795  | 1.0691  | 1.1284  | H                                  | 3.1146  | -2.1438 | 5.2010  |
| H                                  | 0.8478  | 0.3637  | -1.6447 | H                                  | -0.9648 | 0.7124  | 1.0619  | H                                  | 4.4655  | -1.8404 | 2.8982  |
| H                                  | 0.6164  | 2.7496  | -0.8787 | H                                  | 2.4398  | -0.9270 | 0.7224  | H                                  | 3.6351  | -0.9470 | 1.5699  |
| H                                  | -0.4247 | 2.4217  | -2.2852 | H                                  | 3.1178  | -4.1110 | -0.3119 | H                                  | 3.9395  | -0.1288 | 3.1143  |
| H                                  | -1.1507 | 2.5059  | -0.6380 | H                                  | 3.9522  | -2.6740 | 0.3677  | <b>3a-conf.4 Imaginary Freq =0</b> |         |         |         |
| H                                  | 0.9534  | 1.1801  | 0.8555  | H                                  | 3.6428  | -4.0976 | 1.4172  | C                                  | -2.8632 | -3.8575 | -0.0011 |
| H                                  | -0.6441 | 0.4053  | 1.0588  | H                                  | 1.1880  | -4.5816 | 2.2363  | C                                  | -1.6924 | -3.7526 | -0.9403 |
| H                                  | 0.1920  | -1.1480 | 2.7281  | H                                  | -0.1730 | -3.6439 | 1.5363  | C                                  | -2.1049 | -3.0071 | -2.1721 |
| H                                  | 1.0711  | -4.3657 | 3.6641  | H                                  | 0.7684  | -4.7256 | 0.4871  | C                                  | -3.4779 | -2.3671 | -1.8093 |
| H                                  | -0.1258 | -3.0728 | 4.0139  | <b>3a-conf.3 Imaginary Freq =0</b> |         |         | C       | -3.6178                            | -2.5503 | -0.2891 |         |
| H                                  | -0.5970 | -4.4568 | 2.9732  | C                                  | -4.8831 | -1.2453 | -0.9441 | C                                  | -2.9968 | -1.0398 | -2.4537 |
| H                                  | 2.1967  | -4.4457 | 1.2495  | C                                  | -3.8594 | -2.2173 | -0.4232 | C                                  | -1.5399 | -1.5976 | -2.4493 |
| H                                  | 0.5106  | -4.7864 | 0.7087  | C                                  | -3.0747 | -2.8322 | -1.5459 | C                                  | -0.8111 | -0.8178 | -1.3453 |
| H                                  | 1.4363  | -3.4883 | -0.0706 | C                                  | -3.8834 | -2.4891 | -2.8275 | C                                  | -1.4902 | 0.5599  | -1.4102 |
| <b>3a-conf.2 Imaginary Freq =0</b> |         |         |         | C                                  | -5.1533 | -1.7659 | -2.3633 | C                                  | -2.9802 | 0.2515  | -1.6259 |
| C                                  | -4.6457 | -1.1176 | -1.0485 | C                                  | -2.6642 | -1.7063 | -3.3800 | C                                  | -0.4743 | -4.2650 | -0.7306 |
| C                                  | -3.6571 | -1.2231 | 0.0802  | C                                  | -1.8475 | -2.0803 | -2.1088 | C                                  | -3.5549 | -0.8366 | -3.8678 |
| C                                  | -2.5886 | -2.2348 | -0.2223 | C                                  | -1.3804 | -0.7677 | -1.4604 | H                                  | -1.0775 | -1.4951 | -3.4568 |
| C                                  | -3.1417 | -3.0344 | -1.4345 | C                                  | -1.4112 | 0.2197  | -2.6400 | H                                  | -4.3162 | -2.8593 | -2.3590 |
| C                                  | -4.5530 | -2.5014 | -1.7074 | C                                  | -2.6708 | -0.1735 | -3.4253 | H                                  | -2.1712 | -3.6518 | -3.0811 |
| C                                  | -1.9313 | -2.5708 | -2.2844 | C                                  | -3.6737 | -2.5051 | 0.8712  | C                                  | 0.7312  | -0.8128 | -1.4088 |
| C                                  | -1.3533 | -1.8152 | -1.0527 | C                                  | -2.0893 | -2.3219 | -4.6626 | C                                  | 1.3221  | -0.3706 | -2.7602 |
| C                                  | -1.1533 | -0.3464 | -1.4517 | H                                  | -1.0069 | -2.7646 | -2.3738 | C                                  | 1.3502  | 0.0426  | -0.2827 |
| C                                  | -1.0889 | -0.4222 | -2.9892 | H                                  | -4.1077 | -3.3929 | -3.4442 | C                                  | 0.7995  | -0.2357 | 1.1085  |
| C                                  | -2.1034 | -1.5073 | -3.3744 | H                                  | -2.8983 | -3.9267 | -1.4158 | C                                  | 0.9015  | -1.6309 | 1.5894  |

|                                    |         |         |         |                                    |         |         |         |                                    |         |         |         |
|------------------------------------|---------|---------|---------|------------------------------------|---------|---------|---------|------------------------------------|---------|---------|---------|
| O                                  | 0.3590  | 0.6670  | 1.7841  | H                                  | -4.2387 | 0.2952  | -1.7414 | H                                  | -0.6236 | 0.2418  | -3.3142 |
| C                                  | 0.0145  | -2.2091 | 2.4197  | H                                  | -5.8470 | -0.1296 | -1.0431 | H                                  | -2.7786 | 0.2345  | -4.4970 |
| C                                  | 0.2227  | -3.6233 | 2.9120  | H                                  | -6.0523 | -2.0987 | -2.3703 | H                                  | -3.6807 | 0.2164  | -2.9531 |
| C                                  | -1.2351 | -1.5477 | 2.9520  | H                                  | -5.1750 | -1.0951 | -3.5676 | H                                  | -2.7786 | -3.1828 | 1.1837  |
| H                                  | -1.0966 | -1.2608 | -0.3651 | H                                  | -0.8523 | 0.6608  | -2.9566 | H                                  | -4.2317 | -2.0685 | 1.6428  |
| H                                  | -2.5658 | -3.9688 | 1.0672  | H                                  | -0.0909 | -0.9662 | -3.1906 | H                                  | -1.0716 | -1.7603 | -4.9246 |
| H                                  | -3.4842 | -4.7326 | -0.3050 | H                                  | -2.0026 | -0.9965 | -4.7346 | H                                  | -1.8167 | -3.3570 | -4.5760 |
| H                                  | -4.6843 | -2.5942 | 0.0344  | H                                  | -3.0537 | -0.2026 | -3.5253 | H                                  | -2.7282 | -2.1350 | -5.5312 |
| H                                  | -3.1283 | -1.7366 | 0.2896  | H                                  | -3.6446 | -1.7589 | 1.6418  | H                                  | 0.7124  | -0.9742 | -1.5339 |
| H                                  | -1.3245 | 1.1771  | -0.4961 | H                                  | -4.7732 | -0.2758 | 1.3404  | H                                  | 1.3240  | 0.7441  | 0.2260  |
| H                                  | -1.1062 | 1.1268  | -2.2897 | H                                  | -0.8800 | -3.3044 | -4.0330 | H                                  | 0.4148  | 1.4803  | -1.1182 |
| H                                  | -3.4867 | 1.0963  | -2.1486 | H                                  | -2.0775 | -4.4311 | -3.3101 | H                                  | -0.4188 | 1.1363  | 0.4416  |
| H                                  | -3.5121 | 0.1259  | -0.6573 | H                                  | -2.4889 | -3.5350 | -4.8148 | H                                  | -0.8095 | -1.3495 | 1.1399  |
| H                                  | 0.3205  | -4.1544 | -1.4843 | H                                  | 0.6239  | -1.6228 | -0.8562 | H                                  | -0.3509 | -2.6696 | 0.0302  |
| H                                  | -0.2388 | -4.8167 | 0.1920  | H                                  | 1.4920  | 0.4777  | 0.2648  | H                                  | 0.7164  | -0.6251 | 2.7875  |
| H                                  | -3.0156 | -0.0159 | -4.3937 | H                                  | 0.9933  | 0.7864  | -1.4178 | H                                  | 3.3817  | -0.9438 | 4.9689  |
| H                                  | -3.4589 | -1.7548 | -4.4911 | H                                  | -0.0795 | 1.2920  | -0.0618 | H                                  | 1.6348  | -0.5317 | 4.9319  |
| H                                  | -4.6348 | -0.5685 | -3.8207 | H                                  | -1.2386 | -0.5491 | 1.3762  | H                                  | 2.1485  | -2.1641 | 5.4742  |
| H                                  | 1.0649  | -1.8669 | -1.2528 | H                                  | -1.0464 | -2.2769 | 0.9574  | H                                  | 4.3602  | -2.5273 | 3.0322  |
| H                                  | 2.4358  | -0.3641 | -2.7238 | H                                  | 1.3335  | -3.2922 | 0.9899  | H                                  | 3.3028  | -3.7325 | 3.8571  |
| H                                  | 1.0478  | -1.0594 | -3.5900 | H                                  | 4.4957  | -3.7816 | 2.3360  | H                                  | 3.1718  | -3.5143 | 2.1022  |
| H                                  | 0.9976  | 0.6564  | -3.0404 | H                                  | 3.4742  | -4.2470 | 0.9344  | <b>3a-conf.7 Imaginary Freq =0</b> |         |         |         |
| H                                  | 2.4549  | -0.1066 | -0.2440 | H                                  | 4.7260  | -2.9752 | 0.7353  | C                                  | -2.6621 | -3.6185 | -0.1782 |
| H                                  | 1.1883  | 1.1206  | -0.5168 | H                                  | 4.5176  | -0.7808 | 1.9954  | C                                  | -1.5495 | -3.6833 | -1.1892 |
| H                                  | 1.7588  | -2.2178 | 1.2223  | H                                  | 2.9705  | -0.2554 | 2.6876  | C                                  | -1.8791 | -2.8802 | -2.4134 |
| H                                  | -0.6395 | -4.2680 | 2.6291  | H                                  | 3.9766  | -1.4588 | 3.5768  | C                                  | -3.3995 | -2.5830 | -2.2976 |
| H                                  | 1.1433  | -4.0952 | 2.4998  | <b>3a-conf.6 Imaginary Freq =0</b> |         |         | C       | -3.8934                            | -3.3182 | -1.0455 |         |
| H                                  | 0.3109  | -3.6285 | 4.0220  | C                                  | -4.8897 | -1.3589 | -0.9604 | C                                  | -3.0918 | -1.0632 | -2.2798 |
| H                                  | -2.1016 | -2.2412 | 2.8658  | C                                  | -3.7999 | -2.2519 | -0.4325 | C                                  | -1.5710 | -1.3659 | -2.4294 |
| H                                  | -1.1031 | -1.2913 | 4.0273  | C                                  | -2.9745 | -2.8199 | -1.5508 | C                                  | -0.8723 | -0.7038 | -1.2328 |
| H                                  | -1.5330 | -0.6299 | 2.4008  | C                                  | -3.8066 | -2.5460 | -2.8342 | C                                  | -1.8516 | 0.4076  | -0.8223 |
| <b>3a-conf.5 Imaginary Freq =0</b> |         |         |         | C                                  | -5.1239 | -1.9101 | -2.3744 | C                                  | -3.2287 | -0.2538 | -0.9830 |
| C                                  | -4.8862 | -0.5514 | -1.4209 | C                                  | -2.6462 | -1.6839 | -3.3950 | C                                  | -0.4103 | -4.3682 | -1.0294 |
| C                                  | -4.1616 | -1.3641 | -0.3826 | C                                  | -1.8036 | -1.9888 | -2.1223 | C                                  | -3.6701 | -0.3194 | -3.4910 |
| C                                  | -3.3986 | -2.4932 | -1.0123 | C                                  | -1.4285 | -0.6414 | -1.4854 | H                                  | -1.1941 | -1.0291 | -3.4218 |
| C                                  | -3.9588 | -2.5904 | -2.4584 | C                                  | -1.5319 | 0.3320  | -2.6726 | H                                  | -3.9625 | -2.8783 | -3.2158 |
| C                                  | -5.0916 | -1.5618 | -2.5589 | C                                  | -2.7612 | -0.1559 | -3.4528 | H                                  | -1.6058 | -3.3957 | -3.3651 |
| C                                  | -2.5446 | -2.2911 | -3.0194 | C                                  | -3.5938 | -2.5149 | 0.8641  | C                                  | 0.5896  | -0.2736 | -1.4731 |
| C                                  | -1.9817 | -2.2283 | -1.5696 | C                                  | -2.0306 | -2.2680 | -4.6734 | C                                  | 0.7614  | 0.8290  | -2.5345 |
| C                                  | -1.3243 | -0.8507 | -1.3911 | H                                  | -0.9177 | -2.6148 | -2.3833 | C                                  | 1.2750  | 0.1777  | -0.1653 |
| C                                  | -1.0087 | -0.4378 | -2.8393 | H                                  | -3.9670 | -3.4687 | -3.4426 | C                                  | 1.2899  | -0.9032 | 0.9092  |
| C                                  | -2.2212 | -0.9283 | -3.6435 | H                                  | -2.7215 | -3.8981 | -1.4113 | C                                  | 0.2922  | -0.7608 | 1.9943  |
| C                                  | -4.1959 | -1.1207 | 0.9336  | C                                  | -0.0533 | -0.6536 | -0.7862 | O                                  | 2.1118  | -1.7894 | 0.8543  |
| C                                  | -1.9657 | -3.4548 | -3.8350 | C                                  | 0.3334  | 0.7487  | -0.2829 | C                                  | -0.2282 | -1.7773 | 2.7062  |
| H                                  | -1.2816 | -3.0777 | -1.3867 | C                                  | -0.0498 | -1.6570 | 0.3850  | C                                  | -1.2529 | -1.5125 | 3.7870  |
| H                                  | -4.2954 | -3.6236 | -2.7163 | C                                  | 1.3187  | -1.8177 | 1.0344  | C                                  | 0.1028  | -3.2405 | 2.5326  |
| H                                  | -3.4758 | -3.4512 | -0.4446 | C                                  | 1.4306  | -1.3925 | 2.4480  | H                                  | -0.8656 | -1.4392 | -0.3992 |
| C                                  | -0.0999 | -0.8740 | -0.4529 | O                                  | 2.2493  | -2.2272 | 0.3782  | H                                  | -2.4631 | -2.7901 | 0.5380  |
| C                                  | 0.6098  | 0.4914  | -0.4151 | C                                  | 2.3197  | -1.8810 | 3.3322  | H                                  | -2.7660 | -4.5627 | 0.4062  |
| C                                  | -0.5172 | -1.2963 | 0.9709  | C                                  | 2.3683  | -1.3492 | 4.7477  | H                                  | -4.3238 | -4.2941 | -1.3758 |
| C                                  | 0.6524  | -1.4240 | 1.9367  | C                                  | 3.3358  | -2.9635 | 3.0525  | H                                  | -4.7032 | -2.7745 | -0.5062 |
| C                                  | 1.6825  | -2.4179 | 1.5629  | H                                  | -2.1943 | -0.3369 | -0.7367 | H                                  | -1.6827 | 0.7814  | 0.2148  |
| O                                  | 0.6818  | -0.7786 | 2.9599  | H                                  | -4.5217 | -0.3090 | -0.9896 | H                                  | -1.7819 | 1.2708  | -1.5231 |
| C                                  | 2.9923  | -2.3036 | 1.8475  | H                                  | -5.8102 | -1.3864 | -0.3312 | H                                  | -4.0541 | 0.4944  | -1.0282 |
| C                                  | 3.9671  | -3.3854 | 1.4395  | H                                  | -5.8845 | -2.7244 | -2.3023 | H                                  | -3.4249 | -0.9005 | -0.1010 |
| C                                  | 3.6321  | -1.1396 | 2.5672  | H                                  | -5.5239 | -1.1569 | -3.0920 | H                                  | 0.3647  | -4.3664 | -1.8118 |
| H                                  | -2.0576 | -0.1169 | -0.9864 | H                                  | -1.6393 | 1.3968  | -2.3573 | H                                  | -0.2191 | -4.9485 | -0.1136 |



|                                    |         |         |         |                                    |         |         |         |                                     |         |         |         |
|------------------------------------|---------|---------|---------|------------------------------------|---------|---------|---------|-------------------------------------|---------|---------|---------|
| H                                  | -3.2500 | 0.7093  | -3.5673 | H                                  | 1.0779  | -1.0045 | -3.5901 | H                                   | -0.7729 | -2.1581 | 4.8247  |
| H                                  | -3.4481 | -0.8426 | -4.4491 | H                                  | 1.0791  | 0.6929  | -2.9956 | H                                   | -1.0619 | -0.4644 | 4.3016  |
| H                                  | -4.7768 | -0.2362 | -3.3988 | H                                  | 2.4149  | 0.0314  | -0.2377 | H                                   | -2.1999 | -1.7557 | 3.7908  |
| H                                  | 1.1307  | -1.1791 | -1.8440 | H                                  | 1.0560  | 1.1554  | -0.4905 | H                                   | 0.2161  | -3.8955 | 3.0222  |
| H                                  | 1.8406  | 1.0157  | -2.7405 | H                                  | 2.1603  | -1.9576 | 1.2821  | H                                   | -1.4023 | -3.6220 | 2.2773  |
| H                                  | 0.2958  | 0.5630  | -3.5091 | H                                  | 0.3973  | -4.4153 | 2.9043  | H                                   | 0.0598  | -3.4432 | 1.2844  |
| H                                  | 0.3246  | 1.7969  | -2.2013 | H                                  | 2.0772  | -3.8238 | 2.6911  | <b>3a-conf.10</b> Imaginary Freq =0 |         |         |         |
| H                                  | 2.3357  | 0.4554  | -0.3701 | H                                  | 1.2058  | -3.4898 | 4.2255  | C                                   | -3.1693 | -3.5508 | 0.0975  |
| H                                  | 0.7849  | 1.1031  | 0.2147  | H                                  | -1.4975 | -2.7725 | 3.1747  | C                                   | -1.8936 | -3.5989 | -0.6990 |
| H                                  | -0.0706 | 0.2587  | 2.2004  | H                                  | -0.6955 | -1.5268 | 4.2002  | C                                   | -2.1361 | -3.0408 | -2.0679 |
| H                                  | -0.8905 | -1.9047 | 4.7642  | H                                  | -1.3629 | -1.1140 | 2.5718  | C                                   | -3.5202 | -2.3336 | -1.9652 |
| H                                  | -1.4744 | -0.4296 | 3.9230  | <b>3a-conf.9</b> Imaginary Freq =0 |         |         | C       | -3.8367                             | -2.2852 | -0.4614 |         |
| H                                  | -2.2127 | -2.0191 | 3.5369  | C                                  | -2.2042 | -4.3956 | -0.8722 | C                                   | -2.9287 | -1.1229 | -2.7340 |
| H                                  | 0.6279  | -3.6208 | 3.4377  | C                                  | -1.2294 | -3.6768 | -1.7652 | C                                   | -1.4997 | -1.6977 | -2.4876 |
| H                                  | -0.8331 | -3.8296 | 2.4029  | C                                  | -1.9654 | -2.6694 | -2.5961 | C                                   | -0.8641 | -0.7737 | -1.4387 |
| H                                  | 0.7363  | -3.4697 | 1.6512  | C                                  | -3.3554 | -2.5387 | -1.9039 | C                                   | -1.5033 | 0.5882  | -1.7550 |
| <b>3a-conf.8</b> Imaginary Freq =0 |         |         |         | C                                  | -3.2072 | -3.2745 | -0.5621 | C                                   | -2.9673 | 0.2722  | -2.0976 |
| C                                  | -3.3779 | -2.7935 | 0.1516  | C                                  | -3.2478 | -0.9965 | -2.0276 | C                                   | -0.7250 | -4.0851 | -0.2655 |
| C                                  | -2.1758 | -3.4310 | -0.4906 | C                                  | -1.7376 | -1.1562 | -2.3839 | C                                   | -3.3217 | -1.1170 | -4.2164 |
| C                                  | -2.1080 | -3.1126 | -1.9552 | C                                  | -0.9727 | -0.6451 | -1.1547 | H                                   | -0.9250 | -1.7632 | -3.4388 |
| C                                  | -3.5086 | -2.5376 | -2.3033 | C                                  | -1.9058 | 0.4428  | -0.5991 | H                                   | -4.3067 | -2.8889 | -2.5312 |
| C                                  | -4.3516 | -2.6398 | -1.0262 | C                                  | -3.3228 | -0.1265 | -0.7660 | H                                   | -2.1228 | -3.8155 | -2.8718 |
| C                                  | -2.8441 | -1.2046 | -2.7351 | C                                  | 0.0877  | -3.9062 | -1.8202 | C                                   | 0.6781  | -0.7903 | -1.3687 |
| C                                  | -1.4397 | -1.7967 | -2.4121 | C                                  | -4.0774 | -0.4384 | -3.1904 | C                                   | 1.3925  | -0.3776 | -2.6691 |
| C                                  | -0.7918 | -0.8562 | -1.3855 | H                                  | -1.4871 | -0.6171 | -3.3254 | C                                   | 1.2047  | 0.0809  | -0.2088 |
| C                                  | -1.5180 | 0.4779  | -1.6218 | H                                  | -4.1667 | -2.9861 | -2.5276 | C                                   | 0.6129  | -0.2829 | 1.1459  |
| C                                  | -2.9741 | 0.0526  | -1.8649 | H                                  | -2.0622 | -2.9647 | -3.6684 | C                                   | 1.0909  | -1.5516 | 1.7392  |
| C                                  | -1.2802 | -4.1903 | 0.1521  | C                                  | 0.4875  | -0.2105 | -1.4072 | O                                   | -0.1559 | 0.4714  | 1.6980  |
| C                                  | -3.0302 | -0.8975 | -4.2271 | C                                  | 0.6545  | 0.9688  | -2.3835 | C                                   | 0.3977  | -2.2898 | 2.6251  |
| H                                  | -0.8489 | -1.9342 | -3.3454 | C                                  | 1.2179  | 0.1213  | -0.0885 | C                                   | 0.9984  | -3.5427 | 3.2229  |
| H                                  | -3.9811 | -3.0614 | -3.1691 | C                                  | 1.1980  | -1.0308 | 0.9068  | C                                   | -0.9914 | -1.9726 | 3.1258  |
| H                                  | -1.8273 | -3.9910 | -2.5843 | C                                  | 0.3681  | -0.8358 | 2.1163  | H                                   | -1.2462 | -1.0817 | -0.4396 |
| C                                  | 0.7501  | -0.8046 | -1.4013 | O                                  | 1.8579  | -2.0239 | 0.6999  | H                                   | -3.0033 | -3.5108 | 1.1992  |
| C                                  | 1.3666  | -0.3508 | -2.7379 | C                                  | -0.3088 | -1.8179 | 2.7384  | H                                   | -3.7801 | -4.4496 | -0.1531 |
| C                                  | 1.3016  | 0.0904  | -0.2709 | C                                  | -1.1259 | -1.5279 | 3.9772  | H                                   | -4.9336 | -2.2567 | -0.2612 |
| C                                  | 0.7707  | -0.2563 | 1.1131  | C                                  | -0.3489 | -3.2628 | 2.3011  | H                                   | -3.3799 | -1.4079 | 0.0474  |
| C                                  | 1.2074  | -1.5580 | 1.6647  | H                                  | -0.9586 | -1.4668 | -0.4041 | H                                   | -1.4190 | 1.3174  | -0.9152 |
| O                                  | 0.0823  | 0.5345  | 1.7177  | H                                  | -1.7356 | -4.8370 | 0.0377  | H                                   | -1.0187 | 1.0326  | -2.6546 |
| C                                  | 0.5211  | -2.2719 | 2.5757  | H                                  | -2.6998 | -5.2037 | -1.4598 | H                                   | -3.3863 | 1.0403  | -2.7890 |
| C                                  | 1.0830  | -3.5659 | 3.1214  | H                                  | -4.1809 | -3.6636 | -0.1819 | H                                   | -3.6103 | 0.2953  | -1.1906 |
| C                                  | -0.8207 | -1.8889 | 3.1548  | H                                  | -2.7646 | -2.6345 | 0.2329  | H                                   | 0.1604  | -4.0973 | -0.9196 |
| H                                  | -1.0952 | -1.1977 | -0.3712 | H                                  | -1.6839 | 0.7110  | 0.4606  | H                                   | -0.6243 | -4.4929 | 0.7515  |
| H                                  | -3.0914 | -1.8026 | 0.5696  | H                                  | -1.8233 | 1.3651  | -1.2187 | H                                   | -2.7020 | -0.3892 | -4.7885 |
| H                                  | -3.7979 | -3.4094 | 0.9811  | H                                  | -4.0714 | 0.6943  | -0.8629 | H                                   | -3.1867 | -2.1170 | -4.6882 |
| H                                  | -4.9541 | -3.5774 | -1.0946 | H                                  | -3.6287 | -0.7141 | 0.1270  | H                                   | -4.3913 | -0.8282 | -4.3303 |
| H                                  | -5.0746 | -1.7999 | -0.9072 | H                                  | 0.7300  | -3.3432 | -2.5144 | H                                   | 0.9797  | -1.8451 | -1.1601 |
| H                                  | -1.4255 | 1.1854  | -0.7642 | H                                  | 0.5597  | -4.6663 | -1.1783 | H                                   | 2.4975  | -0.4748 | -2.5613 |
| H                                  | -1.1269 | 0.9797  | -2.5364 | H                                  | -3.8001 | 0.6192  | -3.4039 | H                                   | 1.1086  | -1.0157 | -3.5348 |
| H                                  | -3.5720 | 0.8556  | -2.3556 | H                                  | -3.9269 | -1.0212 | -4.1277 | H                                   | 1.1874  | 0.6820  | -2.9401 |
| H                                  | -3.4576 | -0.1612 | -0.8876 | H                                  | -5.1621 | -0.4700 | -2.9401 | H                                   | 2.3147  | 0.0008  | -0.1364 |
| H                                  | -0.4177 | -4.6232 | -0.3785 | H                                  | 1.0087  | -1.0840 | -1.8679 | H                                   | 0.9889  | 1.1539  | -0.4201 |
| H                                  | -1.3855 | -4.3997 | 1.2272  | H                                  | 1.7328  | 1.1673  | -2.5831 | H                                   | 2.0826  | -1.9048 | 1.4136  |
| H                                  | -2.3638 | -0.0659 | -4.5511 | H                                  | 0.1844  | 0.7755  | -3.3729 | H                                   | 0.3658  | -4.4296 | 2.9936  |
| H                                  | -2.8005 | -1.7789 | -4.8684 | H                                  | 0.2247  | 1.9114  | -1.9771 | H                                   | 2.0229  | -3.7578 | 2.8429  |
| H                                  | -4.0833 | -0.5967 | -4.4291 | H                                  | 2.2874  | 0.3630  | -0.2934 | H                                   | 1.0661  | -3.4391 | 4.3295  |
| H                                  | 1.1041  | -1.8489 | -1.2165 | H                                  | 0.7716  | 1.0374  | 0.3618  | H                                   | -1.6060 | -2.9001 | 3.1605  |
| H                                  | 2.4796  | -0.3785 | -2.6895 | H                                  | 0.2840  | 0.1928  | 2.5023  | H                                   | -0.9399 | -1.5547 | 4.1565  |

|                                     |         |         |         |   |         |         |         |                                     |         |         |         |
|-------------------------------------|---------|---------|---------|---|---------|---------|---------|-------------------------------------|---------|---------|---------|
| H                                   | -1.5552 | -1.2667 | 2.4784  | C | -3.8591 | -2.6764 | -2.4265 | C                                   | -1.8293 | 0.5570  | -2.5490 |
| <b>3a-conf.11</b> Imaginary Freq =0 |         |         |         |   |         |         |         |                                     |         |         |         |
| C                                   | -2.3138 | -4.1492 | -0.3454 | C | -5.1039 | -1.7811 | -2.4198 | C                                   | -3.1306 | -0.1600 | -2.9325 |
| C                                   | -1.2360 | -3.6537 | -1.2711 | C | -2.5350 | -2.2133 | -3.0872 | C                                   | -1.8115 | -3.1863 | 0.8938  |
| C                                   | -1.8537 | -2.8559 | -2.3796 | C | -1.8714 | -2.1042 | -1.6836 | C                                   | -2.4796 | -1.8889 | -4.6857 |
| C                                   | -3.3127 | -2.5890 | -1.9030 | C | -1.3597 | -0.6633 | -1.5266 | H                                   | -0.5469 | -2.1424 | -3.0113 |
| C                                   | -3.3378 | -3.0074 | -0.4234 | C | -1.2058 | -0.2011 | -2.9862 | H                                   | -3.5412 | -3.6500 | -3.1111 |
| C                                   | -3.1617 | -1.1109 | -2.3498 | C | -2.4148 | -0.8155 | -3.7060 | H                                   | -1.5488 | -3.9414 | -1.7704 |
| C                                   | -1.6221 | -1.3308 | -2.4673 | C | -3.9936 | -1.2808 | 1.0024  | C                                   | 0.4219  | -0.1594 | -1.5082 |
| C                                   | -1.0136 | -0.5728 | -1.2793 | C | -1.8954 | -3.2947 | -3.9681 | C                                   | 0.7059  | 1.3027  | -1.1184 |
| C                                   | -1.9832 | 0.6046  | -1.0907 | H | -1.0688 | -2.8714 | -1.5720 | C                                   | 1.1217  | -1.1549 | -0.5581 |
| C                                   | -3.3808 | 0.0121  | -1.3275 | H | -4.0974 | -3.7380 | -2.6788 | C                                   | 0.7674  | -1.0902 | 0.9239  |
| C                                   | 0.0727  | -3.8993 | -1.1398 | H | -3.1280 | -3.5003 | -0.4729 | C                                   | 1.4535  | -2.1035 | 1.7609  |
| C                                   | -3.8271 | -0.8313 | -3.7026 | C | -0.0724 | -0.5582 | -0.6823 | O                                   | 0.0120  | -0.2551 | 1.3624  |
| H                                   | -1.2316 | -1.0000 | -3.4569 | C | 0.4802  | 0.8782  | -0.6766 | C                                   | 1.1185  | -2.4528 | 3.0171  |
| H                                   | -4.0524 | -3.1700 | -2.5050 | C | -0.3318 | -1.0444 | 0.7584  | C                                   | 1.9233  | -3.4987 | 3.7587  |
| H                                   | -1.8265 | -3.3730 | -3.3687 | C | 0.9229  | -1.1023 | 1.6205  | C                                   | -0.0295 | -1.8978 | 3.8280  |
| C                                   | 0.4784  | -0.2057 | -1.4214 | C | 1.7782  | -2.2941 | 1.4175  | H                                   | -1.5592 | -0.4285 | -0.6555 |
| C                                   | 0.7682  | 0.8627  | -2.4916 | O | 1.1715  | -0.1996 | 2.3867  | H                                   | -3.7097 | -0.9963 | -0.0822 |
| C                                   | 1.0884  | 0.2412  | -0.0756 | C | 2.7135  | -2.7442 | 2.2742  | H                                   | -4.4432 | -2.4046 | 0.7737  |
| C                                   | 1.1166  | -0.8676 | 0.9716  | C | 3.5440  | -3.9620 | 1.9307  | H                                   | -4.9898 | -3.5279 | -1.2619 |
| C                                   | -0.0182 | -0.9008 | 1.9234  | C | 3.0568  | -2.1389 | 3.6153  | H                                   | -5.2715 | -1.8496 | -1.8197 |
| O                                   | 2.0566  | -1.6287 | 1.0000  | H | -2.1370 | -0.0219 | -1.0529 | H                                   | -2.0250 | 1.5270  | -2.0332 |
| C                                   | -0.3810 | -1.9552 | 2.6772  | H | -4.4024 | 0.1509  | -1.6325 | H                                   | -1.2354 | 0.7596  | -3.4716 |
| C                                   | -1.5730 | -1.8573 | 3.6043  | H | -5.8939 | -0.4604 | -0.8225 | H                                   | -3.6223 | 0.3034  | -3.8194 |
| C                                   | 0.2959  | -3.3053 | 2.7110  | H | -5.9811 | -2.4250 | -2.1693 | H                                   | -3.8479 | -0.0843 | -2.0878 |
| H                                   | -1.1185 | -1.2256 | -0.3863 | H | -5.3172 | -1.3154 | -3.4097 | H                                   | -0.8405 | -3.6925 | 0.7789  |
| H                                   | -1.9536 | -4.3451 | 0.6911  | H | -1.1831 | 0.9093  | -3.0935 | H                                   | -2.1991 | -3.0355 | 1.9133  |
| H                                   | -2.7475 | -5.0845 | -0.7708 | H | -0.2649 | -0.6186 | -3.4164 | H                                   | -1.8112 | -1.1300 | -5.1524 |
| H                                   | -4.3547 | -3.3219 | -0.0901 | H | -2.2753 | -0.8457 | -4.8118 | H                                   | -2.0239 | -2.8900 | -4.8627 |
| H                                   | -2.9958 | -2.2000 | 0.2612  | H | -3.3114 | -0.1897 | -3.5104 | H                                   | -3.4577 | -1.8630 | -5.2177 |
| H                                   | -1.8932 | 1.0894  | -0.0903 | H | -3.3212 | -1.8604 | 1.6541  | H                                   | 0.8840  | -0.2999 | -2.5168 |
| H                                   | -1.7998 | 1.3772  | -1.8722 | H | -4.6280 | -0.5107 | 1.4684  | H                                   | 1.7874  | 1.4595  | -0.9015 |
| H                                   | -4.0835 | 0.7925  | -1.7028 | H | -0.8519 | -3.0207 | -4.2448 | H                                   | 0.4414  | 2.0057  | -1.9411 |
| H                                   | -3.8255 | -0.3677 | -0.3818 | H | -1.8569 | -4.2835 | -3.4566 | H                                   | 0.1273  | 1.6202  | -0.2229 |
| H                                   | 0.7968  | -3.5099 | -1.8717 | H | -2.4809 | -3.4214 | -4.9070 | H                                   | 0.9190  | -2.1942 | -0.9073 |
| H                                   | 0.4563  | -4.5032 | -0.3030 | H | 0.6990  | -1.2172 | -1.1492 | H                                   | 2.2232  | -0.9961 | -0.6366 |
| H                                   | -3.5048 | 0.1555  | -4.1066 | H | 1.4165  | 0.9561  | -0.0788 | H                                   | 2.3051  | -2.6196 | 1.2887  |
| H                                   | -3.5706 | -1.6053 | -4.4615 | H | 0.7382  | 1.2269  | -1.7019 | H                                   | 1.2775  | -4.3675 | 4.0200  |
| H                                   | -4.9352 | -0.8168 | -3.5916 | H | -0.2601 | 1.5914  | -0.2476 | H                                   | 2.7830  | -3.8897 | 3.1687  |
| H                                   | 1.0135  | -1.1334 | -1.7374 | H | -1.0733 | -0.3720 | 1.2494  | H                                   | 2.3343  | -3.0692 | 4.7004  |
| H                                   | 1.8647  | 0.9684  | -2.6613 | H | -0.7891 | -2.0606 | 0.7569  | H                                   | -0.6433 | -2.7333 | 4.2343  |
| H                                   | 0.3164  | 0.6095  | -3.4765 | H | 1.6114  | -2.8553 | 0.4840  | H                                   | 0.3642  | -1.3089 | 4.6870  |
| H                                   | 0.3931  | 1.8657  | -2.1875 | H | 3.3763  | -4.7679 | 2.6807  | H                                   | -0.7340 | -1.2496 | 3.2674  |
| H                                   | 2.1426  | 0.5704  | -0.2321 | H | 3.3055  | -4.3853 | 0.9286  | <b>3a-conf.14</b> Imaginary Freq =0 |         |         |         |
| H                                   | 0.5478  | 1.1353  | 0.3109  | H | 4.6262  | -3.6992 | 1.9319  | C                                   | -4.5899 | -1.8675 | -0.7012 |
| H                                   | -0.6295 | 0.0135  | 1.9862  | H | 4.0609  | -1.6598 | 3.5695  | C                                   | -3.3366 | -2.6025 | -0.3110 |
| H                                   | -1.2632 | -2.0708 | 4.6524  | H | 2.3300  | -1.3862 | 3.9859  | C                                   | -2.5270 | -2.9748 | -1.5193 |
| H                                   | -2.0528 | -0.8523 | 3.5957  | H | 3.0887  | -2.9346 | 4.3937  | C                                   | -3.4966 | -2.7798 | -2.7177 |
| <b>3a-conf.13</b> Imaginary Freq =0 |         |         |         |   |         |         |         |                                     |         |         |         |
| H                                   | -2.3504 | -2.5974 | 3.3071  | C | -3.8464 | -2.1000 | -0.1178 | C                                   | -4.8538 | -2.3850 | -2.1228 |
| H                                   | 0.7980  | -3.4506 | 3.6941  | C | -2.5009 | -2.7706 | -0.1756 | C                                   | -2.5364 | -1.7174 | -3.3121 |
| H                                   | -0.4585 | -4.1145 | 2.5888  | C | -2.0518 | -2.9605 | -1.5949 | C                                   | -1.5533 | -1.9388 | -2.1256 |
| H                                   | 1.0510  | -3.4705 | 1.9154  | C | -3.3466 | -2.7817 | -2.4362 | C                                   | -1.3437 | -0.5783 | -1.4421 |
| <b>3a-conf.12</b> Imaginary Freq =0 |         |         |         |   |         |         |         |                                     |         |         |         |
| C                                   | -4.9244 | -0.7669 | -1.2808 | C | -4.4888 | -2.5460 | -1.4396 | C                                   | -2.8975 | -0.2277 | -3.2735 |
| C                                   | -4.0351 | -1.5045 | -0.3171 | C | -2.6816 | -1.6030 | -3.1916 | C                                   | -2.9894 | -2.9006 | 0.9471  |
| C                                   | -3.2024 | -2.5333 | -1.0256 | C | -1.3810 | -1.7948 | -2.3568 | C                                   | -1.9444 | -2.1362 | -4.6644 |
|                                     |         |         |         | C | -1.0843 | -0.4561 | -1.6609 | H                                   | -0.6043 | -2.4006 | -2.4873 |

|                                     |         |         |         |                                    |          |         |         |                                    |          |         |         |
|-------------------------------------|---------|---------|---------|------------------------------------|----------|---------|---------|------------------------------------|----------|---------|---------|
| H                                   | -3.5614 | -3.6871 | -3.3656 | C                                  | 0.6462   | -1.3130 | 0.9560  | C                                  | -20.3442 | -1.2276 | 2.2714  |
| H                                   | -2.0957 | -4.0028 | -1.4641 | C                                  | 1.3220   | -2.3398 | 1.7845  | H                                  | -17.4044 | 0.1038  | 2.0425  |
| C                                   | 0.0721  | -0.3939 | -0.8564 | O                                  | -0.1807  | -0.5432 | 1.3856  | H                                  | -18.7841 | 1.0992  | 0.5070  |
| C                                   | 0.2727  | 1.0345  | -0.3170 | C                                  | 1.3768   | -2.3563 | 3.1292  | H                                  | -19.3391 | 0.5840  | -1.1293 |
| C                                   | 0.3398  | -1.4246 | 0.2617  | C                                  | 2.0664   | -3.4929 | 3.8524  | H                                  | -17.6398 | 1.8391  | -2.2414 |
| C                                   | 1.7687  | -1.3810 | 0.7858  | C                                  | 0.7858   | -1.3217 | 4.0582  | H                                  | -17.9202 | 2.9649  | -0.8760 |
| C                                   | 2.0243  | -1.2421 | 2.2365  | H                                  | -1.6087  | -0.4565 | -0.6709 | H                                  | -17.2241 | 1.9490  | 3.6589  |
| O                                   | 2.6982  | -1.3673 | 0.0097  | H                                  | -3.7846  | -0.9332 | -0.1641 | H                                  | -15.4278 | 1.9915  | 3.4604  |
| C                                   | 1.3902  | -1.9112 | 3.2165  | H                                  | -4.6030  | -2.3226 | 0.6444  | H                                  | -16.2338 | 3.7591  | 1.9485  |
| C                                   | 1.7097  | -1.6315 | 4.6684  | H                                  | -5.1433  | -3.3813 | -1.4265 | H                                  | -17.5783 | 2.7237  | 1.3820  |
| C                                   | 0.3572  | -2.9931 | 3.0154  | H                                  | -5.3310  | -1.6822 | -1.9600 | H                                  | -17.0603 | -2.4119 | -0.4004 |
| H                                   | -2.0802 | -0.4380 | -0.6187 | H                                  | -1.9285  | 1.5426  | -2.0231 | H                                  | -18.8761 | -1.9216 | -0.5565 |
| H                                   | -4.3906 | -0.7726 | -0.6972 | H                                  | -1.1280  | 0.7627  | -3.4487 | H                                  | -13.7655 | 2.8197  | 1.6333  |
| H                                   | -5.4396 | -2.0679 | -0.0071 | H                                  | -3.5233  | 0.4250  | -3.8794 | H                                  | -13.5022 | 2.1893  | -0.0279 |
| H                                   | -5.4685 | -3.3134 | -2.0400 | H                                  | -3.8216  | 0.0196  | -2.1627 | H                                  | -14.3209 | 3.7739  | 0.2074  |
| H                                   | -5.4262 | -1.6747 | -2.7631 | H                                  | -1.0577  | -3.7632 | 0.7239  | H                                  | -14.8065 | -0.4361 | 3.5987  |
| H                                   | -1.9524 | 1.4351  | -2.1737 | H                                  | -2.4096  | -3.0584 | 1.8366  | H                                  | -15.3883 | -2.8752 | 3.2745  |
| H                                   | -0.8483 | 0.5090  | -3.2711 | H                                  | -1.7445  | -1.0717 | -5.1828 | H                                  | -16.7543 | -2.4047 | 2.2020  |
| H                                   | -3.0619 | 0.2010  | -4.2895 | H                                  | -2.0471  | -2.8241 | -4.9297 | H                                  | -15.0645 | -2.0559 | 1.7162  |
| H                                   | -3.8205 | -0.0326 | -2.6873 | H                                  | -3.4204  | -1.7257 | -5.3087 | H                                  | -16.2248 | -1.5861 | 5.2664  |
| H                                   | -2.0604 | -3.4514 | 1.1589  | H                                  | 0.9051   | -0.3785 | -2.4392 | H                                  | -16.6556 | 0.1288  | 5.1502  |
| H                                   | -3.6212 | -2.6041 | 1.7989  | H                                  | 1.8257   | 1.2656  | -0.7222 | H                                  | -18.9902 | 0.7216  | 4.8701  |
| H                                   | -1.1018 | -1.4690 | -4.9568 | H                                  | 0.5185   | 1.9174  | -1.7511 | H                                  | -20.9874 | 1.5144  | 2.2122  |
| H                                   | -1.5540 | -3.1794 | -4.6461 | H                                  | 0.1615   | 1.4469  | -0.0609 | H                                  | -22.1133 | 0.6536  | 3.3347  |
| H                                   | -2.7229 | -2.0796 | -5.4587 | H                                  | 0.8038   | -2.3447 | -0.9177 | H                                  | -20.8854 | 1.7944  | 3.9826  |
| H                                   | 0.8076  | -0.5576 | -1.6813 | H                                  | 2.1515   | -1.2225 | -0.5546 | H                                  | -21.2758 | -1.7828 | 2.5231  |
| H                                   | 1.2856  | 1.1701  | 0.1256  | H                                  | 1.8204   | -3.1533 | 1.2327  | H                                  | -20.4710 | -0.7811 | 1.2596  |
| H                                   | 0.1787  | 1.7978  | -1.1220 | H                                  | 1.3501   | -3.9990 | 4.5388  | H                                  | -19.5132 | -1.9602 | 2.1825  |
| H                                   | -0.4758 | 1.2740  | 0.4725  | H                                  | 2.4709   | -4.2686 | 3.1633  | <b>3b-conf.2 Imaginary Freq =0</b> |          |         |         |
| H                                   | -0.3802 | -1.2288 | 1.0885  | H                                  | 2.9194   | -3.1065 | 4.4552  | C                                  | -18.4432 | 1.3763  | -0.3603 |
| H                                   | 0.1616  | -2.4548 | -0.1231 | H                                  | -0.1099  | -1.7404 | 4.5704  | C                                  | -17.7289 | 0.0518  | -0.3599 |
| H                                   | 2.8119  | -0.5194 | 2.5055  | H                                  | 1.5300   | -1.0409 | 4.8374  | C                                  | -16.2389 | 0.2392  | -0.3412 |
| H                                   | 2.1327  | -2.5401 | 5.1539  | H                                  | 0.4943   | -0.3689 | 3.5690  | C                                  | -16.0267 | 1.7327  | -0.7149 |
| H                                   | 2.4471  | -0.8075 | 4.8012  | <b>3b-conf.1 Imaginary Freq =0</b> |          |         | C       | -17.4151                           | 2.3119   | -1.0125 |         |
| H                                   | 0.7829  | -1.3397 | 5.2125  | C                                  | -18.4399 | 0.8234  | -0.5146 | C                                  | -15.3280 | 1.9685  | 0.6491  |
| H                                   | -0.6571 | -2.6111 | 3.2703  | C                                  | -17.4734 | -0.3265 | -0.4255 | C                                  | -15.5198 | 0.4659  | 1.0081  |
| H                                   | 0.3467  | -3.4057 | 1.9840  | C                                  | -16.0581 | 0.1617  | -0.3085 | C                                  | -16.3132 | 0.4098  | 2.3222  |
| H                                   | 0.5756  | -3.8600 | 3.6789  | C                                  | -16.1265 | 1.6584  | -0.7209 | C                                  | -16.0095 | 1.7779  | 2.9563  |
| <b>3a-conf.15 Imaginary Freq =0</b> |         |         |         | C                                  | -17.5783 | 1.9351  | -1.1307 | C                                  | -16.0304 | 2.7491  | 1.7671  |
| C                                   | -3.9680 | -2.0290 | -0.2243 | C                                  | -15.5919 | 2.0601  | 0.6779  | C                                  | -18.3376 | -1.1404 | -0.3873 |
| C                                   | -2.6527 | -2.7589 | -0.2572 | C                                  | -15.5040 | 0.5582  | 1.0789  | C                                  | -13.8525 | 2.3645  | 0.5041  |
| C                                   | -2.1746 | -2.9470 | -1.6676 | C                                  | -16.3657 | 0.3694  | 2.3371  | H                                  | -14.5315 | -0.0485 | 1.0668  |
| C                                   | -3.4349 | -2.6925 | -2.5410 | C                                  | -16.3911 | 1.7865  | 2.9363  | H                                  | -15.3189 | 1.8613  | -1.5692 |
| C                                   | -4.5924 | -2.4210 | -1.5716 | C                                  | -16.5184 | 2.7069  | 1.7144  | H                                  | -15.6950 | -0.4651 | -1.0149 |
| C                                   | -2.6941 | -1.5342 | -3.2567 | C                                  | -17.8217 | -1.6187 | -0.4630 | C                                  | -15.9644 | -0.7967 | 3.2154  |
| C                                   | -1.4293 | -1.8001 | -2.3880 | C                                  | -14.2195 | 2.7441  | 0.6191  | C                                  | -16.2023 | -2.1211 | 2.4672  |
| C                                   | -1.0959 | -0.4893 | -1.6569 | H                                  | -14.4397 | 0.2571  | 1.2245  | C                                  | -16.7075 | -0.7652 | 4.5688  |
| C                                   | -1.7614 | 0.5732  | -2.5500 | H                                  | -15.3992 | 1.9114  | -1.5298 | C                                  | -18.2038 | -0.4996 | 4.4744  |
| C                                   | -3.0821 | -0.0756 | -2.9861 | H                                  | -15.3330 | -0.4298 | -0.9170 | C                                  | -19.0332 | -1.5895 | 3.9190  |
| C                                   | -2.0081 | -3.2162 | 0.8234  | C                                  | -15.8445 | -0.7197 | 3.2962  | O                                  | -18.6763 | 0.5365  | 4.8852  |
| C                                   | -2.4610 | -1.8058 | -4.7489 | C                                  | -15.7603 | -2.0828 | 2.5853  | C                                  | -20.0870 | -1.3914 | 3.1065  |
| H                                   | -0.5916 | -2.1714 | -3.0246 | C                                  | -16.6853 | -0.8316 | 4.5861  | C                                  | -20.8881 | -2.5610 | 2.5818  |
| H                                   | -3.6507 | -3.5390 | -3.2368 | C                                  | -18.1301 | -1.2432 | 4.3386  | C                                  | -20.5732 | -0.0441 | 2.6262  |
| H                                   | -1.7125 | -3.9471 | -1.8474 | C                                  | -19.1119 | -0.1459 | 4.2020  | H                                  | -17.4025 | 0.3733  | 2.1007  |
| C                                   | 0.4151  | -0.2660 | -1.4403 | O                                  | -18.4452 | -2.4112 | 4.2996  | H                                  | -18.6579 | 1.6820  | 0.6877  |
| C                                   | 0.7434  | 1.1609  | -0.9649 | C                                  | -20.1004 | -0.1392 | 3.2898  | H                                  | -19.4097 | 1.3436  | -0.9157 |
| C                                   | 1.0419  | -1.3322 | -0.5164 | C                                  | -21.0690 | 1.0179  | 3.2058  | H                                  | -17.5684 | 2.2708  | -2.1177 |

|                                    |          |         |         |                                    |          |         |         |                                    |          |         |         |
|------------------------------------|----------|---------|---------|------------------------------------|----------|---------|---------|------------------------------------|----------|---------|---------|
| H                                  | -17.5212 | 3.3797  | -0.7110 | H                                  | -15.0164 | -2.1862 | -1.1420 | H                                  | -16.2950 | -0.4505 | 3.3028  |
| H                                  | -16.7422 | 2.0711  | 3.7442  | H                                  | -16.5651 | -2.2127 | -2.2212 | H                                  | -18.0150 | -2.1780 | 2.6846  |
| H                                  | -14.9909 | 1.7650  | 3.4112  | H                                  | -15.3629 | 3.0947  | 2.6425  | H                                  | -18.6656 | -1.0992 | 1.4023  |
| H                                  | -15.5228 | 3.7134  | 2.0026  | H                                  | -14.1136 | 3.0227  | 1.3539  | H                                  | -17.0107 | -1.7909 | 1.2608  |
| H                                  | -17.0847 | 2.9907  | 1.5140  | H                                  | -15.4854 | 4.1769  | 1.2049  | H                                  | -17.8163 | 1.2911  | 4.2616  |
| H                                  | -17.7541 | -2.0742 | -0.3929 | H                                  | -15.7691 | -0.7199 | 3.5135  | H                                  | -19.0995 | 0.8331  | 3.0955  |
| H                                  | -19.4357 | -1.2184 | -0.4044 | H                                  | -15.1548 | -3.0237 | 2.7572  | H                                  | -20.8287 | -0.0025 | 4.5059  |
| H                                  | -13.3246 | 2.3099  | 1.4833  | H                                  | -16.0896 | -2.7999 | 1.2372  | H                                  | -22.5482 | -2.9481 | 4.3214  |
| H                                  | -13.3084 | 1.7010  | -0.2064 | H                                  | -14.6109 | -1.8228 | 1.5512  | H                                  | -22.5313 | -2.5763 | 6.0896  |
| H                                  | -13.7704 | 3.4080  | 0.1239  | H                                  | -18.3136 | -2.2045 | 2.5708  | H                                  | -22.7678 | -1.2597 | 4.8917  |
| H                                  | -14.8703 | -0.7517 | 3.4410  | H                                  | -17.2727 | -2.8053 | 3.8973  | H                                  | -20.0644 | -3.5821 | 6.4098  |
| H                                  | -15.9811 | -3.0000 | 3.1151  | H                                  | -20.2787 | -1.9214 | 3.9341  | H                                  | -20.3474 | -4.1468 | 4.7204  |
| H                                  | -17.2526 | -2.2128 | 2.1143  | H                                  | -22.5314 | 0.0967  | 5.6249  | H                                  | -18.8635 | -3.2538 | 5.1056  |
| H                                  | -15.5508 | -2.2110 | 1.5685  | H                                  | -22.4502 | 0.7126  | 3.9281  | <b>3b-conf.5 Imaginary Freq =0</b> |          |         |         |
| H                                  | -16.5429 | -1.7163 | 5.1268  | H                                  | -22.4280 | -1.0535 | 4.2502  | C                                  | -16.8422 | 1.1839  | -2.1708 |
| H                                  | -16.2613 | 0.0329  | 5.2079  | H                                  | -20.5116 | 2.1717  | 4.6897  | C                                  | -16.5270 | -0.0741 | -1.4082 |
| H                                  | -18.7312 | -2.6187 | 4.1718  | H                                  | -20.3508 | 1.4459  | 6.3335  | C                                  | -15.4474 | 0.1625  | -0.3922 |
| H                                  | -21.9563 | -2.4573 | 2.8789  | H                                  | -18.9598 | 1.4735  | 5.1923  | C                                  | -14.8305 | 1.5338  | -0.7836 |
| H                                  | -20.8326 | -2.5974 | 1.4703  | <b>3b-conf.4 Imaginary Freq =0</b> |          |         | C       | -15.5306                           | 1.9767   | -2.0738 |         |
| H                                  | -20.5264 | -3.5416 | 2.9660  | C                                  | -17.2201 | 2.0871  | -1.6581 | C                                  | -15.2442 | 2.1064  | 0.5968  |
| H                                  | -20.7032 | -0.0571 | 1.5207  | C                                  | -17.1674 | 0.6235  | -1.3135 | C                                  | -15.8284 | 0.7205  | 0.9978  |
| H                                  | -21.5589 | 0.1909  | 3.0874  | C                                  | -15.8336 | 0.2494  | -0.7344 | C                                  | -17.3048 | 0.9332  | 1.3678  |
| H                                  | -19.8798 | 0.7967  | 2.8419  | C                                  | -14.9102 | 1.4563  | -1.0585 | C                                  | -17.3482 | 2.4266  | 1.7357  |
| <b>3b-conf.3 Imaginary Freq =0</b> |          |         |         | C                                  | -15.7432 | 2.4322  | -1.8980 | C                                  | -16.4115 | 3.0932  | 0.7181  |
| C                                  | -17.2501 | 0.4473  | -1.8146 | C                                  | -14.6863 | 1.6843  | 0.4588  | C                                  | -17.1251 | -1.2550 | -1.6095 |
| C                                  | -16.1007 | -0.3623 | -1.2791 | C                                  | -15.5829 | 0.4525  | 0.7771  | C                                  | -14.0431 | 2.5203  | 1.4574  |
| C                                  | -15.2175 | 0.4680  | -0.3929 | C                                  | -16.7203 | 0.9347  | 1.6911  | H                                  | -15.2273 | 0.2692  | 1.8223  |
| C                                  | -15.6399 | 1.9353  | -0.6813 | C                                  | -16.1280 | 2.2063  | 2.3234  | H                                  | -13.7203 | 1.4851  | -0.8946 |
| C                                  | -16.6932 | 1.8782  | -1.7942 | C                                  | -15.3449 | 2.8666  | 1.1796  | H                                  | -14.6957 | -0.6613 | -0.3447 |
| C                                  | -16.0465 | 2.1034  | 0.8052  | C                                  | -18.1741 | -0.2387 | -1.5025 | C                                  | -17.8021 | -0.0123 | 2.4812  |
| C                                  | -15.5889 | 0.6445  | 1.0971  | C                                  | -13.2254 | 1.4864  | 0.8844  | C                                  | -17.7134 | -1.4788 | 2.0197  |
| C                                  | -16.7905 | -0.1083 | 1.6916  | H                                  | -14.9728 | -0.3664 | 1.2266  | C                                  | -19.2435 | 0.3280  | 2.9117  |
| C                                  | -17.6521 | 1.0352  | 2.2525  | H                                  | -13.9686 | 1.1460  | -1.5728 | C                                  | -19.8053 | -0.6071 | 3.9737  |
| C                                  | -17.5235 | 2.1568  | 1.2124  | H                                  | -15.4405 | -0.7219 | -1.1190 | C                                  | -19.0399 | -0.6724 | 5.2381  |
| C                                  | -15.8830 | -1.6526 | -1.5626 | C                                  | -17.1845 | -0.1286 | 2.7082  | O                                  | -20.8412 | -1.2037 | 3.7850  |
| C                                  | -15.2039 | 3.1533  | 1.5416  | C                                  | -17.7478 | -1.3612 | 1.9761  | C                                  | -18.9396 | -1.7670 | 6.0137  |
| H                                  | -14.6961 | 0.6459  | 1.7662  | C                                  | -18.2379 | 0.4380  | 3.6818  | C                                  | -18.1475 | -1.7294 | 7.3014  |
| H                                  | -14.7709 | 2.5842  | -0.9480 | C                                  | -18.7106 | -0.5871 | 4.7040  | C                                  | -19.5638 | -3.1098 | 5.7152  |
| H                                  | -14.1287 | 0.2833  | -0.5553 | C                                  | -20.1662 | -0.8486 | 4.7496  | H                                  | -17.9542 | 0.7886  | 0.4749  |
| C                                  | -16.3881 | -1.1934 | 2.7134  | O                                  | -17.9134 | -1.1178 | 5.4440  | H                                  | -17.6782 | 1.7181  | -1.6666 |
| C                                  | -15.5160 | -2.2635 | 2.0270  | C                                  | -20.7158 | -2.0420 | 5.0397  | H                                  | -17.1449 | 0.9827  | -3.2252 |
| C                                  | -17.6048 | -1.8818 | 3.3682  | C                                  | -22.2183 | -2.2087 | 5.0860  | H                                  | -14.8827 | 1.6722  | -2.9307 |
| C                                  | -18.3155 | -1.0503 | 4.4279  | C                                  | -19.9487 | -3.3093 | 5.3364  | H                                  | -15.6642 | 3.0809  | -2.1460 |
| C                                  | -19.7934 | -1.0251 | 4.3531  | H                                  | -17.6025 | 1.2416  | 1.0849  | H                                  | -18.3764 | 2.8578  | 1.6939  |
| O                                  | -17.6808 | -0.4872 | 5.2908  | H                                  | -17.6343 | 2.6523  | -0.7935 | H                                  | -16.9440 | 2.5727  | 2.7654  |
| C                                  | -20.5627 | 0.0131  | 4.7290  | H                                  | -17.8596 | 2.2963  | -2.5476 | H                                  | -16.0848 | 4.1067  | 1.0484  |
| C                                  | -22.0695 | -0.0680 | 4.6251  | H                                  | -15.5154 | 2.2321  | -2.9726 | H                                  | -16.9529 | 3.2255  | -0.2426 |
| C                                  | -20.0588 | 1.3327  | 5.2650  | H                                  | -15.4928 | 3.5016  | -1.7082 | H                                  | -16.8442 | -2.1399 | -1.0171 |
| H                                  | -17.3767 | -0.5992 | 0.8822  | H                                  | -16.9046 | 2.8906  | 2.7399  | H                                  | -17.9138 | -1.3705 | -2.3693 |
| H                                  | -18.1231 | 0.3402  | -1.1328 | H                                  | -15.4249 | 1.9268  | 3.1434  | H                                  | -14.3520 | 2.7134  | 2.5100  |
| H                                  | -17.5652 | 0.1242  | -2.8345 | H                                  | -14.6023 | 3.6100  | 1.5527  | H                                  | -13.2528 | 1.7354  | 1.4796  |
| H                                  | -16.1693 | 2.0553  | -2.7642 | H                                  | -16.0526 | 3.4179  | 0.5247  | H                                  | -13.5844 | 3.4517  | 1.0544  |
| H                                  | -17.4761 | 2.6660  | -1.7012 | H                                  | -18.0682 | -1.3007 | -1.2311 | H                                  | -17.1291 | 0.1159  | 3.3633  |
| H                                  | -18.7174 | 0.7436  | 2.4056  | H                                  | -19.1330 | 0.0922  | -1.9311 | H                                  | -17.9842 | -2.1869 | 2.8357  |
| H                                  | -17.2286 | 1.3851  | 3.2231  | H                                  | -13.1342 | 1.4362  | 1.9933  | H                                  | -18.4003 | -1.6698 | 1.1641  |
| H                                  | -17.8206 | 3.1490  | 1.6253  | H                                  | -12.7916 | 0.5474  | 0.4705  | H                                  | -16.6832 | -1.7492 | 1.6953  |
| H                                  | -18.2044 | 1.9442  | 0.3610  | H                                  | -12.6017 | 2.3355  | 0.5234  | H                                  | -19.3026 | 1.3623  | 3.3221  |

|                                    |          |         |         |                                    |          |         |         |                                    |          |         |         |
|------------------------------------|----------|---------|---------|------------------------------------|----------|---------|---------|------------------------------------|----------|---------|---------|
| H                                  | -19.9084 | 0.2964  | 2.0170  | H                                  | -21.5755 | 0.9684  | 5.2717  | C                                  | -17.4534 | -0.3881 | -0.4866 |
| H                                  | -18.5018 | 0.2433  | 5.5323  | H                                  | -20.5375 | 2.1553  | 4.3947  | C                                  | -16.1293 | 0.3013  | -0.3316 |
| H                                  | -18.8005 | -2.0055 | 8.1602  | H                                  | -20.8569 | 0.5645  | 3.6732  | C                                  | -16.4753 | 1.8143  | -0.4519 |
| H                                  | -17.3016 | -2.4522 | 7.2550  | <b>3b-conf.7</b> Imaginary Freq =0 |          |         | C       | -17.9957                           | 1.9047   | -0.2441 |         |
| H                                  | -17.7172 | -0.7254 | 7.5182  | C                                  | -17.0525 | 1.5969  | -1.9312 | C                                  | -15.4871 | 2.1006  | 0.7052  |
| H                                  | -18.8007 | -3.9141 | 5.8190  | C                                  | -16.7500 | 0.2201  | -1.4053 | C                                  | -15.4967 | 0.5811  | 1.0563  |
| H                                  | -20.3865 | -3.3163 | 6.4366  | C                                  | -15.4606 | 0.2036  | -0.6362 | C                                  | -16.3206 | 0.4419  | 2.3465  |
| H                                  | -19.9696 | -3.2081 | 4.6857  | C                                  | -14.7671 | 1.5457  | -0.9998 | C                                  | -16.1432 | 1.8144  | 3.0273  |
| <b>3b-conf.6</b> Imaginary Freq =0 |          |         | C       | -15.6584                           | 2.2308   | -2.0426 | C       | -16.0088                           | 2.8683   | 1.9215  |         |
| C                                  | -16.6134 | -0.0269 | -1.9724 | C                                  | -14.8050 | 1.9624  | 0.4932  | C                                  | -17.6457 | -1.7096 | -0.4008 |
| C                                  | -15.4916 | -0.4408 | -1.0593 | C                                  | -15.4668 | 0.6014  | 0.8572  | C                                  | -14.1255 | 2.6006  | 0.2088  |
| C                                  | -15.1310 | 0.6627  | -0.1072 | C                                  | -16.7933 | 0.9100  | 1.5693  | H                                  | -14.4575 | 0.1908  | 1.1652  |
| C                                  | -15.8152 | 1.9282  | -0.6945 | C                                  | -16.5651 | 2.3352  | 2.1028  | H                                  | -16.1654 | 2.2356  | -1.4387 |
| C                                  | -16.4672 | 1.5012  | -2.0151 | C                                  | -15.7834 | 3.0367  | 0.9829  | H                                  | -15.3802 | -0.0155 | -1.0964 |
| C                                  | -16.6479 | 2.0731  | 0.6052  | C                                  | -17.5236 | -0.8551 | -1.6004 | C                                  | -15.8867 | -0.7189 | 3.2714  |
| C                                  | -15.9343 | 0.8258  | 1.2033  | C                                  | -13.4070 | 2.1296  | 1.1034  | C                                  | -15.9028 | -2.0785 | 2.5544  |
| C                                  | -17.0203 | -0.1956 | 1.5806  | H                                  | -14.7703 | -0.0174 | 1.4710  | C                                  | -16.7196 | -0.7978 | 4.5704  |
| C                                  | -18.2641 | 0.6939  | 1.7427  | H                                  | -13.7206 | 1.4000  | -1.3615 | C                                  | -18.1739 | -1.1880 | 4.3434  |
| C                                  | -18.1425 | 1.7335  | 0.6199  | H                                  | -14.8285 | -0.6912 | -0.8505 | C                                  | -19.1052 | -0.0894 | 4.0084  |
| C                                  | -14.8836 | -1.6332 | -1.0950 | C                                  | -17.1665 | -0.1259 | 2.6503  | O                                  | -18.5352 | -2.3357 | 4.4766  |
| C                                  | -16.3398 | 3.3645  | 1.3747  | C                                  | -17.3578 | -1.5162 | 2.0164  | C                                  | -20.0840 | -0.1943 | 3.0918  |
| H                                  | -15.2936 | 1.1255  | 2.0662  | C                                  | -18.4365 | 0.2890  | 3.4198  | C                                  | -20.9966 | 0.9739  | 2.7971  |
| H                                  | -15.1013 | 2.7772  | -0.8245 | C                                  | -18.8279 | -0.7018 | 4.5089  | C                                  | -20.3700 | -1.4286 | 2.2695  |
| H                                  | -14.0304 | 0.7829  | 0.0345  | C                                  | -20.0993 | -1.4328 | 4.3074  | H                                  | -17.3885 | 0.3011  | 2.0711  |
| C                                  | -16.6534 | -1.0472 | 2.8146  | O                                  | -18.0841 | -0.8870 | 5.4454  | H                                  | -19.5370 | 0.3215  | -0.4873 |
| C                                  | -15.3750 | -1.8612 | 2.5304  | C                                  | -20.8635 | -1.9391 | 5.2925  | H                                  | -18.5498 | 0.6915  | -1.9696 |
| C                                  | -17.7755 | -2.0187 | 3.2398  | C                                  | -22.1306 | -2.6998 | 4.9690  | H                                  | -18.4358 | 2.8139  | -0.7171 |
| C                                  | -18.9912 | -1.3854 | 3.9023  | C                                  | -20.5803 | -1.8285 | 6.7724  | H                                  | -18.2840 | 1.9109  | 0.8304  |
| C                                  | -18.7169 | -0.5004 | 5.0558  | H                                  | -17.6277 | 0.9572  | 0.8334  | H                                  | -16.9738 | 2.0657  | 3.7271  |
| O                                  | -20.1075 | -1.6619 | 3.5250  | H                                  | -17.6878 | 2.1387  | -1.1954 | H                                  | -15.1940 | 1.8071  | 3.6138  |
| C                                  | -19.4534 | 0.5750  | 5.3893  | H                                  | -17.5932 | 1.5750  | -2.9064 | H                                  | -15.3085 | 3.6773  | 2.2359  |
| C                                  | -19.0905 | 1.4122  | 6.5954  | H                                  | -15.2493 | 1.9824  | -3.0514 | H                                  | -16.9750 | 3.3762  | 1.7063  |
| C                                  | -20.6653 | 1.0766  | 4.6397  | H                                  | -15.6599 | 3.3423  | -1.9592 | H                                  | -16.8089 | -2.3917 | -0.1893 |
| H                                  | -17.2133 | -0.8873 | 0.7297  | H                                  | -17.5145 | 2.8710  | 2.3403  | H                                  | -18.6418 | -2.1504 | -0.5624 |
| H                                  | -17.5843 | -0.3308 | -1.5212 | H                                  | -15.9392 | 2.2960  | 3.0256  | H                                  | -13.3722 | 2.5781  | 1.0291  |
| H                                  | -16.5397 | -0.4931 | -2.9829 | H                                  | -15.2663 | 3.9564  | 1.3434  | H                                  | -13.7310 | 1.9783  | -0.6265 |
| H                                  | -15.7573 | 1.7541  | -2.8390 | H                                  | -16.4917 | 3.3548  | 0.1887  | H                                  | -14.2094 | 3.6488  | -0.1578 |
| H                                  | -17.4186 | 2.0400  | -2.2314 | H                                  | -17.2415 | -1.8373 | -1.1901 | H                                  | -14.8258 | -0.5282 | 3.5678  |
| H                                  | -19.2200 | 0.1251  | 1.6664  | H                                  | -18.4615 | -0.7840 | -2.1731 | H                                  | -15.5552 | -2.8945 | 3.2289  |
| H                                  | -18.2285 | 1.2148  | 2.7281  | H                                  | -13.4609 | 2.2079  | 2.2131  | H                                  | -16.9285 | -2.3419 | 2.2145  |
| H                                  | -18.7849 | 2.6264  | 0.8025  | H                                  | -12.7384 | 1.2723  | 0.8608  | H                                  | -15.2299 | -2.0856 | 1.6674  |
| H                                  | -18.4825 | 1.2804  | -0.3354 | H                                  | -12.9260 | 3.0553  | 0.7136  | H                                  | -16.2652 | -1.5554 | 5.2516  |
| H                                  | -14.0622 | -1.8708 | -0.4011 | H                                  | -16.3214 | -0.1870 | 3.3786  | H                                  | -16.6727 | 0.1623  | 5.1330  |
| H                                  | -15.1902 | -2.4060 | -1.8171 | H                                  | -17.5446 | -2.2989 | 2.7863  | H                                  | -18.9486 | 0.8732  | 4.5205  |
| H                                  | -16.7781 | 3.3355  | 2.3983  | H                                  | -18.2223 | -1.5187 | 1.3141  | H                                  | -20.8857 | 1.2886  | 1.7345  |
| H                                  | -15.2445 | 3.5358  | 1.4847  | H                                  | -16.4572 | -1.8402 | 1.4475  | H                                  | -22.0577 | 0.6847  | 2.9716  |
| H                                  | -16.7679 | 4.2421  | 0.8392  | H                                  | -18.2791 | 1.2671  | 3.9298  | H                                  | -20.7810 | 1.8633  | 3.4315  |
| H                                  | -16.4251 | -0.3581 | 3.6625  | H                                  | -19.2769 | 0.4374  | 2.7028  | H                                  | -19.5665 | -2.1954 | 2.3056  |
| H                                  | -15.0484 | -2.4324 | 3.4297  | H                                  | -20.4354 | -1.5526 | 3.2647  | H                                  | -21.3209 | -1.8987 | 2.6076  |
| H                                  | -15.5421 | -2.5933 | 1.7077  | H                                  | -22.0772 | -3.7284 | 5.3924  | H                                  | -20.4828 | -1.1559 | 1.1966  |
| H                                  | -14.5199 | -1.2106 | 2.2384  | H                                  | -23.0140 | -2.1834 | 5.4083  | <b>3b-conf.9</b> Imaginary Freq =0 |          |         |         |
| H                                  | -18.1032 | -2.6077 | 2.3516  | H                                  | -22.3126 | -2.7989 | 3.8748  | C                                  | -16.5178 | 0.8255  | -2.2656 |
| H                                  | -17.3812 | -2.7558 | 3.9777  | H                                  | -21.4946 | -1.4889 | 7.3097  | C                                  | -16.0115 | -0.2791 | -1.3785 |
| H                                  | -17.8250 | -0.7436 | 5.6556  | H                                  | -20.2890 | -2.8232 | 7.1792  | C                                  | -15.0863 | 0.2528  | -0.3225 |
| H                                  | -18.8502 | 2.4535  | 6.2824  | H                                  | -19.7869 | -1.0975 | 7.0361  | C                                  | -14.7358 | 1.6916  | -0.7931 |
| H                                  | -19.9447 | 1.4463  | 7.3090  | <b>3b-conf.8</b> Imaginary Freq =0 |          |         | C       | -15.4088                           | 1.8822   | -2.1577 |         |
| H                                  | -18.2082 | 1.0182  | 7.1492  | C                                  | -18.5241 | 0.6030  | -0.8582 | C                                  | -15.3651 | 2.2623  | 0.5040  |

|                                     |          |         |         |                                     |          |         |         |   |          |         |         |
|-------------------------------------|----------|---------|---------|-------------------------------------|----------|---------|---------|---|----------|---------|---------|
| C                                   | -15.6810 | 0.8170  | 0.9877  | C                                   | -13.4985 | 2.3135  | 0.6187  | C | -14.4621 | -0.8985 | 3.6612  |
| C                                   | -17.1939 | 0.7380  | 1.2473  | H                                   | -14.3888 | -0.0250 | 1.2043  | C | -16.9227 | -1.4286 | 3.5300  |
| C                                   | -17.5723 | 2.2113  | 1.4799  | H                                   | -14.5850 | 1.7031  | -1.6510 | C | -18.3513 | -0.9998 | 3.8434  |
| C                                   | -16.7165 | 2.9857  | 0.4673  | H                                   | -15.1815 | -0.5563 | -1.0177 | C | -19.4109 | -1.8962 | 3.3300  |
| C                                   | -16.3365 | -1.5710 | -1.5127 | C                                   | -16.1976 | -0.5486 | 3.1089  | O | -18.5781 | -0.0144 | 4.5080  |
| C                                   | -14.3459 | 2.9822  | 1.3971  | C                                   | -16.4257 | -1.9144 | 2.4366  | C | -20.6589 | -1.5042 | 3.0147  |
| H                                   | -15.0658 | 0.5644  | 1.8836  | C                                   | -17.1169 | -0.3917 | 4.3383  | C | -21.6795 | -2.5058 | 2.5229  |
| H                                   | -13.6341 | 1.8706  | -0.8311 | C                                   | -18.6081 | -0.3831 | 4.0227  | C | -21.1779 | -0.0874 | 3.0954  |
| H                                   | -14.1874 | -0.3880 | -0.1576 | C                                   | -19.3327 | -1.6538 | 4.2557  | H | -17.1864 | 0.9469  | 2.4144  |
| C                                   | -17.5706 | -0.2093 | 2.4058  | O                                   | -19.1259 | 0.6186  | 3.5842  | H | -18.3971 | 2.1962  | 0.9386  |
| C                                   | -17.1387 | -1.6510 | 2.0810  | C                                   | -20.6627 | -1.7759 | 4.4224  | H | -19.4463 | 1.8084  | -0.4755 |
| C                                   | -19.0799 | -0.1503 | 2.7169  | C                                   | -21.2886 | -3.1400 | 4.6168  | H | -17.6711 | 2.1019  | -2.0444 |
| C                                   | -19.5163 | -1.0942 | 3.8308  | C                                   | -21.6641 | -0.6446 | 4.4315  | H | -17.1873 | 3.3772  | -0.8841 |
| C                                   | -19.2231 | -0.6334 | 5.2073  | H                                   | -17.3736 | 0.5703  | 1.6743  | H | -15.9757 | 2.6704  | 3.6007  |
| O                                   | -20.0410 | -2.1490 | 3.5554  | H                                   | -18.2892 | 1.8320  | -0.0474 | H | -14.3829 | 1.9732  | 3.1146  |
| C                                   | -19.7956 | -1.1023 | 6.3316  | H                                   | -18.7456 | 1.3958  | -1.7371 | H | -14.7619 | 3.7010  | 1.4191  |
| C                                   | -19.3807 | -0.5638 | 7.6838  | H                                   | -16.6724 | 2.1550  | -2.6349 | H | -16.4909 | 3.2610  | 1.2900  |
| C                                   | -20.8620 | -2.1697 | 6.4095  | H                                   | -16.8237 | 3.3688  | -1.3259 | H | -18.4434 | -1.7903 | 0.3493  |
| H                                   | -17.7280 | 0.3949  | 0.3324  | H                                   | -16.9477 | 2.3794  | 3.2721  | H | -19.9061 | -0.5971 | 0.3654  |
| H                                   | -17.4827 | 1.2060  | -1.8621 | H                                   | -15.1802 | 1.9908  | 3.2995  | H | -12.9885 | 1.7589  | 0.9438  |
| H                                   | -16.6892 | 0.4892  | -3.3151 | H                                   | -15.3450 | 3.8353  | 1.6812  | H | -13.3599 | 0.9012  | -0.5900 |
| H                                   | -14.6471 | 1.6600  | -2.9432 | H                                   | -16.8250 | 3.1342  | 0.9620  | H | -13.4142 | 2.6982  | -0.5360 |
| H                                   | -15.7603 | 2.9251  | -2.3339 | H                                   | -17.4042 | -2.0267 | -0.6424 | H | -16.0274 | 0.2326  | 4.5820  |
| H                                   | -18.6605 | 2.4117  | 1.3371  | H                                   | -19.0095 | -1.1087 | -1.0228 | H | -14.3098 | -1.4721 | 4.6047  |
| H                                   | -17.2887 | 2.5139  | 2.5157  | H                                   | -13.1620 | 2.3153  | 1.6805  | H | -14.2800 | -1.6125 | 2.8270  |
| H                                   | -16.6324 | 4.0666  | 0.7274  | H                                   | -12.8676 | 1.5779  | 0.0693  | H | -13.6703 | -0.1170 | 3.6286  |
| H                                   | -17.1968 | 2.9305  | -0.5327 | H                                   | -13.2960 | 3.3210  | 0.1894  | H | -16.8800 | -1.8878 | 2.5149  |
| H                                   | -15.9270 | -2.3316 | -0.8297 | H                                   | -15.1446 | -0.5325 | 3.4841  | H | -16.6696 | -2.2220 | 4.2716  |
| H                                   | -17.0227 | -1.9049 | -2.3066 | H                                   | -16.2964 | -2.7492 | 3.1631  | H | -19.1298 | -2.9520 | 3.1858  |
| H                                   | -14.7693 | 3.1818  | 2.4078  | H                                   | -17.4511 | -1.9890 | 2.0096  | H | -22.5737 | -2.4972 | 3.1866  |
| H                                   | -13.4154 | 2.3858  | 1.5364  | H                                   | -15.7055 | -2.0931 | 1.6063  | H | -22.0042 | -2.2490 | 1.4891  |
| H                                   | -14.0584 | 3.9576  | 0.9430  | H                                   | -16.8968 | -1.2025 | 5.0717  | H | -21.2894 | -3.5486 | 2.5001  |
| H                                   | -17.0126 | 0.1219  | 3.3148  | H                                   | -16.8770 | 0.5538  | 4.8776  | H | -21.7406 | 0.1666  | 2.1688  |
| H                                   | -17.3053 | -2.3356 | 2.9435  | H                                   | -18.7166 | -2.5659 | 4.3030  | H | -21.8713 | 0.0160  | 3.9604  |
| H                                   | -17.7082 | -2.0518 | 1.2118  | H                                   | -21.7962 | -3.1947 | 5.6065  | H | -20.3841 | 0.6852  | 3.1814  |
| H                                   | -16.0548 | -1.7137 | 1.8345  | H                                   | -22.0450 | -3.3298 | 3.8218  |   |          |         |         |
| H                                   | -19.3829 | 0.8805  | 3.0123  | H                                   | -20.5479 | -3.9707 | 4.5763  |   |          |         |         |
| H                                   | -19.6578 | -0.3957 | 1.7952  | H                                   | -22.2760 | -0.6718 | 3.5015  |   |          |         |         |
| H                                   | -18.4770 | 0.1722  | 5.2988  | H                                   | -22.3515 | -0.7525 | 5.3008  |   |          |         |         |
| H                                   | -20.2495 | -0.0890 | 8.1936  | H                                   | -21.2189 | 0.3680  | 4.5269  |   |          |         |         |
| H                                   | -19.0048 | -1.3922 | 8.3262  |                                     |          |         |         |   |          |         |         |
| H                                   | -18.5734 | 0.2009  | 7.6211  | <b>3b-conf.11</b> Imaginary Freq =0 |          |         |         |   |          |         |         |
| H                                   | -20.4355 | -3.1008 | 6.8466  | C                                   | -18.4168 | 1.7045  | -0.0594 |   |          |         |         |
| H                                   | -21.6931 | -1.8284 | 7.0674  | C                                   | -17.9865 | 0.2696  | 0.0795  |   |          |         |         |
| H                                   | -21.3347 | -2.4274 | 5.4388  | C                                   | -16.5021 | 0.1294  | -0.0904 |   |          |         |         |
|                                     |          |         |         | C                                   | -16.0637 | 1.4598  | -0.7644 |   |          |         |         |
| <b>3b-conf.10</b> Imaginary Freq =0 |          |         |         | C                                   | -17.3406 | 2.2787  | -0.9926 |   |          |         |         |
| C                                   | -17.8992 | 1.4370  | -1.0120 | C                                   | -15.1255 | 1.7470  | 0.4353  |   |          |         |         |
| C                                   | -17.2687 | 0.0906  | -0.7803 | C                                   | -15.5508 | 0.4014  | 1.0972  |   |          |         |         |
| C                                   | -15.7983 | 0.2199  | -0.5050 | C                                   | -16.0942 | 0.7477  | 2.4906  |   |          |         |         |
| C                                   | -15.4427 | 1.6696  | -0.9365 | C                                   | -15.4424 | 2.1088  | 2.7969  |   |          |         |         |
| C                                   | -16.7212 | 2.2772  | -1.5262 | C                                   | -15.4740 | 2.8437  | 1.4499  |   |          |         |         |
| C                                   | -14.9935 | 1.9841  | 0.5138  | C                                   | -18.8209 | -0.7583 | 0.2763  |   |          |         |         |
| C                                   | -15.3230 | 0.5220  | 0.9345  | C                                   | -13.6422 | 1.7740  | 0.0421  |   |          |         |         |
| C                                   | -16.3401 | 0.5946  | 2.0845  | H                                   | -14.6909 | -0.3049 | 1.1066  |   |          |         |         |
| C                                   | -16.0952 | 1.9998  | 2.6611  | H                                   | -15.4900 | 1.2919  | -1.7079 |   |          |         |         |
| C                                   | -15.8486 | 2.8745  | 1.4237  | H                                   | -16.2128 | -0.7730 | -0.6806 |   |          |         |         |
| C                                   | -17.9280 | -1.0741 | -0.8181 | C                                   | -15.8783 | -0.2959 | 3.6086  |   |          |         |         |

**Table S5.** SCF energies (Hartree) computed at the PCM/ mPW1PW91/6-31G\* level of theory of isomers **3a** and **3b** using coordinate files incorporated in Table S10.

|            |                                   |             |
|------------|-----------------------------------|-------------|
| 3a_1_DP4+  | SCF Energy (PCM/mPW1PW91/6-31G*)= | -855.193566 |
| 3a_2_DP4+  | SCF Energy (PCM/mPW1PW91/6-31G*)= | -855.192640 |
| 3a_3_DP4+  | SCF Energy (PCM/mPW1PW91/6-31G*)= | -855.195336 |
| 3a_4_DP4+  | SCF Energy (PCM/mPW1PW91/6-31G*)= | -855.188848 |
| 3a_5_DP4+  | SCF Energy (PCM/mPW1PW91/6-31G*)= | -855.194024 |
| 3a_6_DP4+  | SCF Energy (PCM/mPW1PW91/6-31G*)= | -855.195335 |
| 3a_7_DP4+  | SCF Energy (PCM/mPW1PW91/6-31G*)= | -855.191597 |
| 3a_8_DP4+  | SCF Energy (PCM/mPW1PW91/6-31G*)= | -855.191828 |
| 3a_9_DP4+  | SCF Energy (PCM/mPW1PW91/6-31G*)= | -855.187601 |
| 3a_10_DP4+ | SCF Energy (PCM/mPW1PW91/6-31G*)= | -855.188848 |
| 3a_11_DP4+ | SCF Energy (PCM/mPW1PW91/6-31G*)= | -855.187710 |
| 3a_12_DP4+ | SCF Energy (PCM/mPW1PW91/6-31G*)= | -855.194025 |
| 3a_13_DP4+ | SCF Energy (PCM/mPW1PW91/6-31G*)= | -855.191428 |
| 3a_14_DP4+ | SCF Energy (PCM/mPW1PW91/6-31G*)= | -855.189653 |
| 3a_15_DP4+ | SCF Energy (PCM/mPW1PW91/6-31G*)= | -855.191428 |
| 3b_1_DP4+  | SCF Energy (PCM/mPW1PW91/6-31G*)= | -855.191006 |
| 3b_2_DP4+  | SCF Energy (PCM/mPW1PW91/6-31G*)= | -855.192328 |
| 3b_3_DP4+  | SCF Energy (PCM/mPW1PW91/6-31G*)= | -855.193515 |
| 3b_4_DP4+  | SCF Energy (PCM/mPW1PW91/6-31G*)= | -855.194803 |
| 3b_5_DP4+  | SCF Energy (PCM/mPW1PW91/6-31G*)= | -855.193759 |
| 3b_6_DP4+  | SCF Energy (PCM/mPW1PW91/6-31G*)= | -855.192214 |
| 3b_7_DP4+  | SCF Energy (PCM/mPW1PW91/6-31G*)= | -855.194803 |
| 3b_8_DP4+  | SCF Energy (PCM/mPW1PW91/6-31G*)= | -855.185862 |
| 3b_9_DP4+  | SCF Energy (PCM/mPW1PW91/6-31G*)= | -855.193759 |
| 3b_10_DP4+ | SCF Energy (PCM/mPW1PW91/6-31G*)= | -855.192330 |
| 3b_11_DP4+ | SCF Energy (PCM/mPW1PW91/6-31G*)= | -855.192524 |

**Table S6.** Absolute energy values of all conformers of isomers **3a** and **3b** used after optimization at the B3LYP/6-311G(d,p) level of theory as required for DP4+.

| Conformers | Zero-point correction | Thermal correction to Energy | Thermal correction to Enthalpy | Thermal correction to Gibbs Free Energy | Sum of electronic and zero-point Energies | Sum of electronic and thermal Energies | Sum of electronic and thermal Enthalpies | Sum of electronic and thermal Free Energies |
|------------|-----------------------|------------------------------|--------------------------------|-----------------------------------------|-------------------------------------------|----------------------------------------|------------------------------------------|---------------------------------------------|
|            | Hartree/Particle      | Hartree/Particle             | Hartree/Particle               | Hartree                                 | Hartree                                   | Hartree                                | Hartree                                  | Energies/Hartree                            |
| 3a_1_DP4+  | 0.453419              | 0.475588                     | 0.476532                       | 0.400400                                | -855.143294                               | -855.121125                            | -855.120181                              | -855.196313                                 |
| 3a_2_DP4+  | 0.453792              | 0.475779                     | 0.476723                       | 0.402840                                | -855.141712                               | -855.119725                            | -855.118781                              | -855.192663                                 |
| 3a_3_DP4+  | 0.453264              | 0.475401                     | 0.476345                       | 0.401108                                | -855.145377                               | -855.123240                            | -855.122296                              | -855.197534                                 |
| 3a_4_DP4+  | 0.453808              | 0.475984                     | 0.476928                       | 0.401526                                | -855.138281                               | -855.116105                            | -855.115161                              | -855.190563                                 |
| 3a_5_DP4+  | 0.453491              | 0.475687                     | 0.476631                       | 0.400934                                | -855.143774                               | -855.121578                            | -855.120633                              | -855.196331                                 |
| 3a_6_DP4+  | 0.453264              | 0.475402                     | 0.476346                       | 0.401107                                | -855.145377                               | -855.123240                            | -855.122295                              | -855.197534                                 |
| 3a_7_DP4+  | 0.453605              | 0.475679                     | 0.476623                       | 0.402073                                | -855.141677                               | -855.119604                            | -855.118660                              | -855.193210                                 |
| 3a_8_DP4+  | 0.453889              | 0.475957                     | 0.476901                       | 0.401920                                | -855.141371                               | -855.119303                            | -855.118359                              | -855.193340                                 |
| 3a_9_DP4+  | 0.453676              | 0.475978                     | 0.476567                       | 0.401212                                | -855.141770                               | -855.119387                            | -855.118540                              | -855.193540                                 |
| 3a_10_DP4+ | 0.453807              | 0.475983                     | 0.476927                       | 0.401524                                | -855.138282                               | -855.116106                            | -855.115162                              | -855.190565                                 |
| 3a_11_DP4+ | 0.453681              | 0.475836                     | 0.476780                       | 0.401297                                | -855.137596                               | -855.115441                            | -855.114497                              | -855.189980                                 |
| 3a_12_DP4+ | 0.453491              | 0.475687                     | 0.476631                       | 0.400938                                | -855.143774                               | -855.121578                            | -855.120634                              | -855.196327                                 |
| 3a_13_DP4+ | 0.453661              | 0.475690                     | 0.476634                       | 0.401648                                | -855.141128                               | -855.119099                            | -855.118155                              | -855.193141                                 |
| 3a_14_DP4+ | 0.453604              | 0.475722                     | 0.476666                       | 0.401466                                | -855.139210                               | -855.117092                            | -855.116148                              | -855.191347                                 |

|                   |          |          |          |          |             |             |             |             |
|-------------------|----------|----------|----------|----------|-------------|-------------|-------------|-------------|
| <b>3a_15_DP4+</b> | 0.453657 | 0.475688 | 0.476632 | 0.401616 | -855.141132 | -855.119101 | -855.118157 | -855.193173 |
| <b>3b_1_DP4+</b>  | 0.454020 | 0.475965 | 0.476909 | 0.402327 | -855.140178 | -855.118233 | -855.117289 | -855.191871 |
| <b>3b_2_DP4+</b>  | 0.453921 | 0.475933 | 0.476877 | 0.401647 | -855.141519 | -855.119507 | -855.118563 | -855.193793 |
| <b>3b_3_DP4+</b>  | 0.453325 | 0.475462 | 0.476406 | 0.400890 | -855.143528 | -855.121391 | -855.120447 | -855.195963 |
| <b>3b_4_DP4+</b>  | 0.453209 | 0.475416 | 0.476361 | 0.400873 | -855.144993 | -855.122786 | -855.121842 | -855.197329 |
| <b>3b_5_DP4+</b>  | 0.453476 | 0.475670 | 0.476614 | 0.400740 | -855.143517 | -855.121324 | -855.120380 | -855.196253 |
| <b>3b_6_DP4+</b>  | 0.453632 | 0.475683 | 0.476627 | 0.401742 | -855.141646 | -855.119594 | -855.118650 | -855.193536 |
| <b>3b_7_DP4+</b>  | 0.453210 | 0.475416 | 0.476360 | 0.400875 | -855.144992 | -855.122786 | -855.121842 | -855.197327 |
| <b>3b_8_DP4+</b>  | 0.453736 | 0.475875 | 0.476819 | 0.401220 | -855.135389 | -855.113250 | -855.112305 | -855.187904 |
| <b>3b_9_DP4+</b>  | 0.453475 | 0.475669 | 0.476613 | 0.400733 | -855.143519 | -855.121324 | -855.120380 | -855.196261 |
| <b>3b_10_DP4+</b> | 0.453822 | 0.475882 | 0.476826 | 0.401243 | -855.141612 | -855.119553 | -855.118608 | -855.194191 |
| <b>3b_11_DP4+</b> | 0.453390 | 0.475540 | 0.476484 | 0.401442 | -855.142439 | -855.120289 | -855.119345 | -855.194387 |

**Table S7.** Experiment and calculated  $^{13}\text{C}$  NMR chemical shifts of stereoisomers **3a–3b**.

|        | <b>3</b>               | <b>3a</b>               | <b>3b</b>               |
|--------|------------------------|-------------------------|-------------------------|
| Labels | $\delta_{\text{exp.}}$ | $\delta_{\text{calc.}}$ | $\delta_{\text{calc.}}$ |
| 1      | 36.4                   | 41.2                    | 40.2                    |
| 2      | 152.2                  | 151.1                   | 150.3                   |
| 3      | 41.5                   | 45.9                    | 46.0                    |
| 4      | 46.4                   | 50.1                    | 49.1                    |
| 5      | 27.9                   | 33.3                    | 32.7                    |
| 6      | 44.8                   | 48.8                    | 48.3                    |
| 7      | 52.1                   | 54.2                    | 55.5                    |
| 8      | 48.4                   | 50.6                    | 48.4                    |
| 9      | 31.5                   | 35.2                    | 36.9                    |
| 10     | 33.1                   | 37.3                    | 36.6                    |
| 11     | 108                    | 107.3                   | 107.3                   |
| 12     | 30.3                   | 32.7                    | 32.2                    |
| 16     | 36.3                   | 38.2                    | 43.8                    |
| 17     | 19.2                   | 23.2                    | 23.4                    |
| 18     | 51.3                   | 55.3                    | 51.2                    |
| 19     | 201.7                  | 192.5                   | 193.2                   |
| 20     | 124.4                  | 120.7                   | 121.8                   |
| 22     | 154.6                  | 155.1                   | 155.2                   |
| 23     | 27.8                   | 31.8                    | 31.0                    |
| 24     | 20.8                   | 23.0                    | 22.4                    |



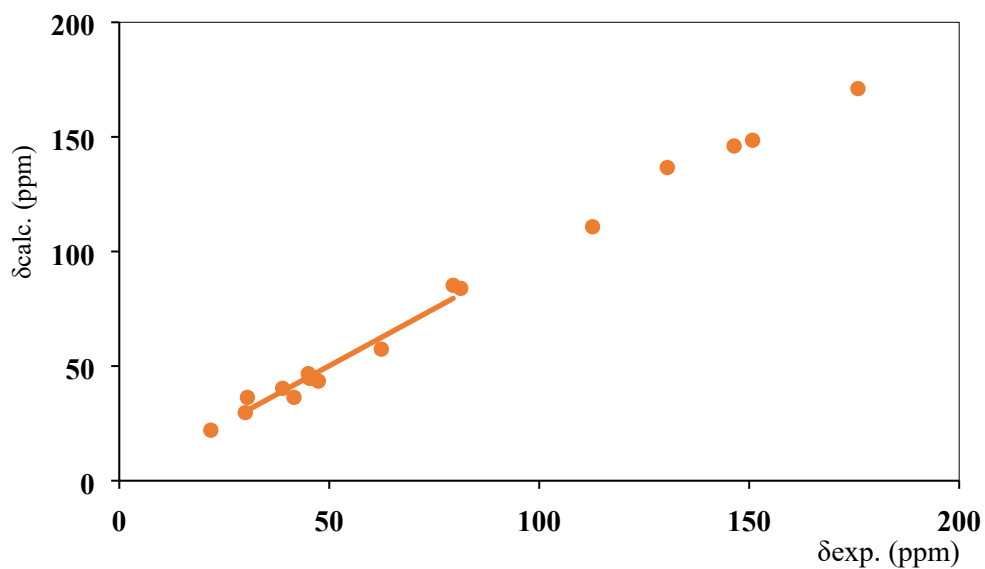

**Figure S38.** Regression analysis of experimental *versus* calculated <sup>13</sup>C NMR chemical shifts at mPW1PW91/6-31G\* level using GIAO method of **3a**; linear fitting is shown as a line (orange).

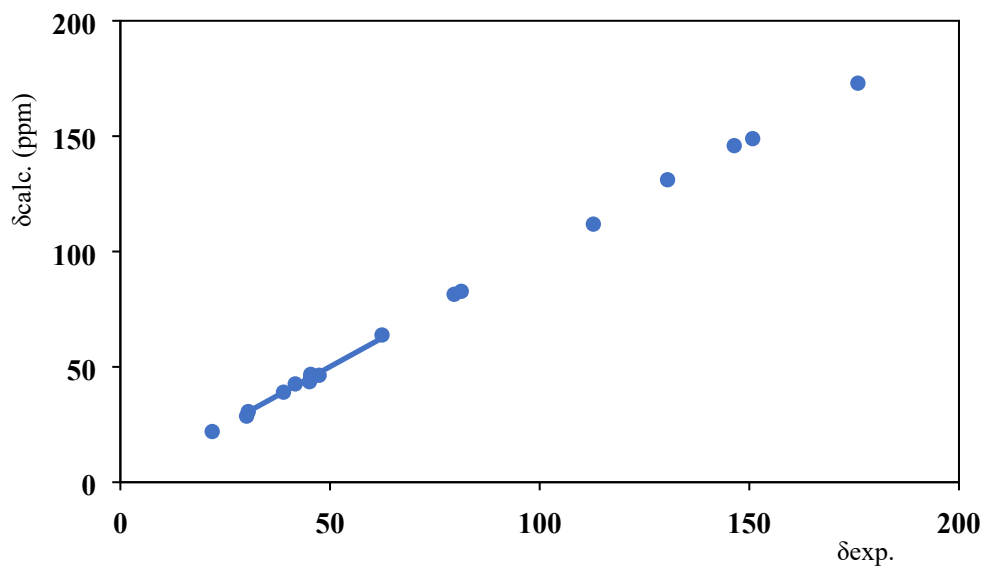

**Figure S39.** Regression analysis of experimental *versus* calculated <sup>13</sup>C NMR chemical shifts at mPW1PW91/6-31G\* level using GIAO method of **3b**; linear fitting is shown as a line (blue).

| Functional<br>mPW1PW91 |      | Solvent?<br>PCM |            | Basis Set<br>6-31+G(d, p) |          |
|------------------------|------|-----------------|------------|---------------------------|----------|
|                        |      | DP4+            | 99.98%     | 0.02%                     | -        |
| Nuclei                 | sp2? | Experimental    | Isomer 1   | Isomer 2                  | Isomer 3 |
| C                      |      | 36.4            | 156.521201 | 156.763843                |          |
| C                      | x    | 152.2           | 43.3714728 | 43.5502591                |          |
| C                      |      | 41.5            | 151.626153 | 150.764556                |          |
| C                      |      | 46.4            | 147.314211 | 147.648979                |          |
| C                      |      | 27.9            | 164.678924 | 164.521795                |          |
| C                      |      | 44.8            | 148.684553 | 148.466739                |          |
| C                      |      | 52.1            | 143.126377 | 141.042538                |          |
| C                      |      | 48.4            | 146.847153 | 148.302363                |          |
| C                      |      | 31.5            | 162.687742 | 160.220954                |          |
| C                      |      | 33.1            | 160.511347 | 160.524245                |          |
| C                      | x    | 108             | 88.4133262 | 87.7552455                |          |
| C                      |      | 30.3            | 165.283877 | 165.018252                |          |
| C                      |      | 36.3            | 159.554943 | 153.043952                |          |
| C                      |      | 19.2            | 175.084154 | 174.100121                |          |
| C                      |      | 51.3            | 142.018847 | 145.468509                |          |
| C                      | x    | 201.7           | 0.66312068 | -0.627892                 |          |
| C                      | x    | 124.4           | 74.6240214 | 72.8433294                |          |
| C                      | x    | 154.6           | 39.2183133 | 38.4600428                |          |
| C                      |      | 27.8            | 166.244641 | 166.227533                |          |
| C                      |      | 20.8            | 175.305669 | 175.078481                |          |

  

| Functional<br>mPW1PW91 | Solvent?<br>PCM | Basis Set<br>6-31+G(d, p) |          | Type of Data<br>Shielding Tensors |          |          |          |
|------------------------|-----------------|---------------------------|----------|-----------------------------------|----------|----------|----------|
|                        |                 | Isomer 1                  | Isomer 2 | Isomer 3                          | Isomer 4 | Isomer 5 | Isomer 6 |
| sDP4+ (H data)         |                 | -                         | -        | -                                 | -        | -        | -        |
| sDP4+ (C data)         |                 | 97.53%                    | 2.47%    | -                                 | -        | -        | -        |
| sDP4+ (all data)       |                 | 97.53%                    | 2.47%    | -                                 | -        | -        | -        |
| uDP4+ (H data)         |                 | -                         | -        | -                                 | -        | -        | -        |
| uDP4+ (C data)         |                 | 99.41%                    | 0.59%    | -                                 | -        | -        | -        |
| uDP4+ (all data)       |                 | 99.41%                    | 0.59%    | -                                 | -        | -        | -        |
| DP4+ (H data)          |                 | -                         | -        | -                                 | -        | -        | -        |
| DP4+ (C data)          |                 | 99.98%                    | 0.02%    | -                                 | -        | -        | -        |
| DP4+ (all data)        |                 | 99.98%                    | 0.02%    | -                                 | -        | -        | -        |

Figure S40. DP4+ evaluation of theoretical and experimental data of 3.

## 3.2 Computational details (TDDFT-ECD) of 1-3

Torsional sampling (MCMM) conformational searches using OPLS\_2005 force field were carried out by means of the conformational search module in the MacroModel [9] applying an energy window of 21 kJ/mol, which afforded the conformers for **1-3**. The Boltzmann populations of the conformers were obtained based on the potential energy provided by the OPLS\_2005 force field, which afforded the conformers for **1-3** above 1% population for re-optimization. The re-optimization and the following TDDFT calculations of the re-optimized geometries were all performed with Gaussian 09 [4] at the B3LYP/6-311G(d,p) level with IEFPCM solvent model for acetonitrile. Frequency analysis was performed as well to confirm that the re-optimized geometries were at the energy minima. Finally, the SpecDis1.62 [10] software was used to obtain the Boltzmann-averaged ECD spectra of **1-3** and visualize the results.

**Table S8.** Cartesian coordinates for the re-optimized conformers of **1-3** at the B3LYP/6-311G(d,p) level with IEFPCM solvent model for methanol.

| <b>Sinuausone A (1) Conf. 1 P = 85.640%</b>       |      |           |           |           | <b>Sinuausone A (2) Conf. 1 P = 4.789%</b>        |      |           |           |           |
|---------------------------------------------------|------|-----------|-----------|-----------|---------------------------------------------------|------|-----------|-----------|-----------|
| B3LYP/6-326G(d,p) Energy / Hartree = -855.5880477 |      |           |           |           | B3LYP/6-326G(d,p) Energy / Hartree = -855.5851837 |      |           |           |           |
| I                                                 | atom | X         | Y         | Z         | I                                                 | atom | X         | Y         | Z         |
| 1                                                 | C    | 3.775008  | -0.595666 | -0.701302 | 1                                                 | C    | 3.790193  | -0.49459  | -0.673881 |
| 2                                                 | C    | 2.83872   | -1.829458 | -0.517393 | 2                                                 | C    | 2.894156  | -1.752669 | -0.455055 |
| 3                                                 | C    | 1.674512  | -1.532786 | 0.413857  | 3                                                 | C    | 1.725648  | -1.478063 | 0.477968  |
| 4                                                 | C    | 0.431589  | -0.960139 | -0.236307 | 4                                                 | C    | 0.470488  | -0.935922 | -0.172161 |
| 5                                                 | C    | 2.97614   | 0.637455  | -1.014066 | 5                                                 | C    | 2.951516  | 0.695647  | -1.041451 |
| 6                                                 | C    | -0.430933 | 0.077717  | 0.564885  | 6                                                 | C    | -0.436695 | 0.057229  | 0.637632  |
| 7                                                 | C    | -0.792656 | 1.424963  | -0.125578 | 7                                                 | C    | -0.850497 | 1.371034  | -0.076721 |
| 8                                                 | C    | 0.210224  | 2.56472   | 0.199341  | 8                                                 | C    | 0.12287   | 2.566166  | 0.116581  |
| 9                                                 | C    | 1.553472  | 2.611939  | -0.573635 | 9                                                 | C    | 1.442892  | 2.622586  | -0.690542 |
| 10                                                | C    | 2.591822  | 1.594817  | -0.159622 | 10                                                | C    | 2.530136  | 1.676739  | -0.232933 |
| 11                                                | C    | 1.779368  | -1.77007  | 1.724563  | 11                                                | C    | 1.83734   | -1.710267 | 1.78915   |
| 12                                                | C    | 3.111325  | 1.741644  | 1.250508  | 12                                                | C    | 3.050211  | 1.914743  | 1.164541  |
| 13                                                | C    | -1.566876 | -0.983394 | 0.683177  | 13                                                | C    | -1.54749  | -1.041725 | 0.662598  |
| 14                                                | C    | -2.996708 | -0.616586 | 0.400773  | 14                                                | C    | -2.957393 | -0.571757 | 0.43222   |
| 15                                                | C    | -3.251973 | 0.755502  | -0.174106 | 15                                                | C    | -3.18301  | 0.803368  | 1.009622  |
| 16                                                | C    | -2.245347 | 1.837344  | 0.264785  | 16                                                | C    | -2.279545 | 1.877179  | 0.339798  |
| 17                                                | C    | -0.837427 | -1.91628  | -0.359896 | 17                                                | C    | -0.767675 | -1.931366 | -0.352376 |
| 18                                                | C    | -1.419273 | -1.868473 | -1.777745 | 18                                                | C    | -1.293553 | -1.892757 | -1.792529 |
| 19                                                | C    | -0.716732 | -3.369532 | 0.088384  | 19                                                | C    | -0.595306 | -3.383629 | 0.087517  |
| 20                                                | O    | -3.90518  | -1.404492 | 0.609321  | 20                                                | O    | -3.818912 | -1.224178 | -0.130138 |
| 21                                                | C    | -2.707725 | 3.180991  | -0.32329  | 21                                                | C    | -2.998273 | 2.496269  | -0.868237 |
| 22                                                | H    | 0.70341   | -0.583861 | -1.221398 | 22                                                | H    | 0.739471  | -0.521891 | -1.141928 |
| 23                                                | H    | -0.792486 | 1.281796  | -1.215507 | 23                                                | H    | -0.900187 | 1.150367  | -1.150793 |
| 24                                                | H    | -0.005282 | 0.307495  | 1.544021  | 24                                                | H    | -0.045348 | 0.28958   | 1.630486  |
| 25                                                | H    | -1.552427 | -1.470047 | 1.661673  | 25                                                | H    | -1.566986 | -1.525142 | 1.6477    |
| 26                                                | H    | 4.356145  | -0.468576 | 0.214487  | 26                                                | H    | 4.356166  | -0.314047 | 0.242384  |
| 27                                                | H    | 4.48605   | -0.816963 | -1.50527  | 27                                                | H    | 4.516868  | -0.721722 | -1.462183 |
| 28                                                | H    | 2.454634  | -2.135396 | -1.496494 | 28                                                | H    | 2.514152  | -2.091648 | -1.425095 |
| 29                                                | H    | 3.432986  | -2.663003 | -0.131956 |                                                   |      |           |           |           |
| 30                                                | H    | 2.545644  | 0.662471  | -2.014868 |                                                   |      |           |           |           |
| 31                                                | H    | -0.277499 | 3.514886  | -0.019741 |                                                   |      |           |           |           |
| 32                                                | H    | 0.399266  | 2.573839  | 1.278859  |                                                   |      |           |           |           |
| 33                                                | H    | 1.963754  | 3.619709  | -0.423249 |                                                   |      |           |           |           |
| 34                                                | H    | 1.348111  | 2.515047  | -1.64491  |                                                   |      |           |           |           |
| 35                                                | H    | 0.985195  | -1.53874  | 2.426285  |                                                   |      |           |           |           |
| 36                                                | H    | 2.680219  | -2.205026 | 2.146119  |                                                   |      |           |           |           |
| 37                                                | H    | 3.964212  | 1.096304  | 1.456769  |                                                   |      |           |           |           |
| 38                                                | H    | 3.419547  | 2.778449  | 1.42877   |                                                   |      |           |           |           |
| 39                                                | H    | 2.339838  | 1.510685  | 1.99132   |                                                   |      |           |           |           |

|    |   |           |           |           |
|----|---|-----------|-----------|-----------|
| 29 | H | 3.517962  | -2.558008 | -0.056559 |
| 30 | H | 2.518796  | 0.655928  | -2.040894 |
| 31 | H | -0.43061  | 3.471548  | -0.153402 |
| 32 | H | 0.335784  | 2.666105  | 1.187096  |
| 33 | H | 1.810223  | 3.654956  | -0.61295  |
| 34 | H | 1.221685  | 2.44759   | -1.748552 |
| 35 | H | 1.037384  | -1.497418 | 2.490163  |
| 36 | H | 2.748297  | -2.123668 | 2.210753  |
| 37 | H | 3.923185  | 1.307144  | 1.399685  |
| 38 | H | 3.328911  | 2.968313  | 1.284491  |
| 39 | H | 2.289993  | 1.703392  | 1.9226    |
| 40 | H | -2.930086 | 0.742532  | 2.074857  |
| 41 | H | -4.237264 | 1.074757  | 0.927834  |
| 42 | H | -2.143789 | 2.665658  | 1.087107  |
| 43 | H | -2.245846 | -2.420122 | -1.876533 |
| 44 | H | -1.44623  | -0.871852 | -2.151101 |
| 45 | H | -0.570162 | -2.37349  | -2.45907  |
| 46 | H | -1.564802 | -3.892018 | 0.064221  |
| 47 | H | 0.081777  | -3.922016 | -0.583699 |
| 48 | H | -0.194668 | -3.460831 | 1.099591  |
| 49 | H | -2.373182 | 3.244583  | -1.362947 |
| 50 | H | -3.248649 | 1.729744  | -1.608774 |
| 51 | H | -3.927622 | 2.985812  | -0.56384  |

**Sinuousone A (1) Conf. 3 P = 3.183%**

B3LYP/6-326G(d,p) Energy / Hartree = -855.5903136

|    |   |           |           |           |
|----|---|-----------|-----------|-----------|
| 1  | C | -3.375046 | -1.152122 | 0.514549  |
| 2  | C | -2.167665 | -2.032804 | 0.092425  |
| 3  | C | -0.954092 | -1.878167 | 1.001352  |
| 4  | C | 0.281666  | -1.126633 | 0.549964  |
| 5  | C | -2.984979 | 0.298555  | 0.611221  |
| 6  | C | 0.271926  | 0.125238  | -0.386212 |
| 7  | C | 0.217515  | 1.553255  | 0.23044   |
| 8  | C | -0.702173 | 2.519958  | -0.562645 |
| 9  | C | -2.197684 | 2.504769  | -0.163573 |
| 10 | C | -2.873218 | 1.172976  | -0.39588  |
| 11 | C | -0.962497 | -2.444268 | 2.21436   |
| 12 | C | -3.303586 | 0.895516  | -1.814815 |
| 13 | C | 1.597839  | -0.38623  | -1.038749 |
| 14 | C | 2.872879  | 0.246257  | -0.537175 |
| 15 | C | 2.743558  | 1.186321  | 0.636952  |
| 16 | C | 1.619493  | 2.21197   | 0.389857  |
| 17 | C | 1.308388  | -1.821033 | -0.429335 |
| 18 | C | 2.453087  | -2.561859 | 0.259676  |
| 19 | C | 0.685858  | -2.729562 | -1.494822 |
| 20 | O | 3.942413  | 0.024471  | -1.079489 |
| 21 | C | 1.627239  | 3.272053  | 1.498823  |
| 22 | H | 0.841813  | -0.873318 | 1.454709  |
| 23 | H | -0.198166 | 1.444206  | 1.240251  |
| 24 | H | -0.526486 | 0.021264  | -1.119701 |
| 25 | H | 1.640099  | -0.382652 | -2.130134 |
| 26 | H | -4.182904 | -1.308472 | -0.206725 |
| 27 | H | -3.746316 | -1.501046 | 1.482639  |
| 28 | H | -2.483794 | -3.080931 | 0.087644  |
| 29 | H | -1.911146 | -1.779071 | -0.936866 |
| 30 | H | -2.639524 | 0.62282   | 1.590466  |
| 31 | H | -0.348873 | 3.54613   | -0.423112 |
| 32 | H | -0.594403 | 2.315213  | -1.63432  |
| 33 | H | -2.70977  | 3.292463  | -0.729355 |
| 34 | H | -2.271474 | 2.774008  | 0.895192  |
| 35 | H | -0.131049 | -2.331648 | 2.902769  |
| 36 | H | -1.802012 | -3.040546 | 2.559652  |

|    |   |           |           |           |
|----|---|-----------|-----------|-----------|
| 37 | H | -3.75699  | -0.088045 | -1.939052 |
| 38 | H | -4.030107 | 1.648094  | -2.142619 |
| 39 | H | -2.457405 | 0.963255  | -2.507972 |
| 40 | H | 3.704911  | 1.682117  | 0.789293  |
| 41 | H | 2.522377  | 0.609071  | 1.543425  |
| 42 | H | 1.854774  | 2.714985  | -0.55825  |
| 43 | H | 3.220399  | -2.858667 | -0.461245 |
| 44 | H | 2.933371  | -1.957845 | 1.033337  |
| 45 | H | 2.071001  | -3.469715 | 0.7373    |
| 46 | H | 1.460456  | -3.058769 | -2.194026 |
| 47 | H | 0.24404   | -3.620612 | -1.038928 |
| 48 | H | -0.088173 | -2.225853 | -2.076478 |
| 49 | H | 0.845163  | 4.021016  | 1.350698  |
| 50 | H | 1.463324  | 2.805496  | 2.475751  |
| 51 | H | 2.586502  | 3.796145  | 1.533096  |

**Sinuousone A (1) Conf. 4 P = 2.349%**

B3LYP/6-326G(d,p) Energy / Hartree = -855.5845249

|    |   |           |           |           |
|----|---|-----------|-----------|-----------|
| 1  | C | -3.487    | -0.780647 | -0.390462 |
| 2  | C | -2.312897 | -1.768142 | -0.673944 |
| 3  | C | -1.415062 | -1.99763  | 0.536463  |
| 4  | C | -0.069326 | -1.303275 | 0.663606  |
| 5  | C | -2.957358 | 0.468788  | 0.254415  |
| 6  | C | 0.255138  | 0.036158  | -0.078312 |
| 7  | C | 0.596397  | 1.273291  | 0.778713  |
| 8  | C | -0.632108 | 1.98979   | 1.393799  |
| 9  | C | -1.679243 | 2.595518  | 0.432097  |
| 10 | C | -2.531445 | 1.589439  | -0.336907 |
| 11 | C | -1.80923  | -2.83842  | 1.499829  |
| 12 | C | -2.770793 | 1.927664  | -1.786467 |
| 13 | C | 1.46291   | -0.637679 | -0.786341 |
| 14 | C | 2.822553  | 0.009535  | -0.695419 |
| 15 | C | 2.889967  | 1.458009  | -0.237656 |
| 16 | C | 1.545455  | 2.185605  | -0.044972 |
| 17 | C | 1.186589  | -1.99399  | -0.037903 |
| 18 | C | 2.2444    | -2.420087 | 0.982669  |
| 19 | C | 0.888261  | -3.154304 | -0.987202 |
| 20 | O | 3.837308  | -0.595369 | -0.997134 |
| 21 | C | 1.807099  | 3.563529  | 0.577428  |
| 22 | H | 0.142129  | -1.204626 | 1.731775  |
| 23 | H | 1.185142  | 0.928214  | 1.642858  |
| 24 | H | -0.504587 | 0.311656  | -0.804445 |
| 25 | H | 1.284406  | -0.756909 | -1.861118 |
| 26 | H | -4.010236 | -0.58286  | -1.329509 |
| 27 | H | -4.200554 | -1.27464  | 0.276986  |
| 28 | H | -2.73315  | -2.724125 | -1.000959 |
| 29 | H | -1.7315   | -1.376138 | -1.512228 |
| 30 | H | -2.726432 | 0.342509  | 1.308484  |
| 31 | H | -1.12735  | 1.292569  | 2.074864  |
| 32 | H | -0.260795 | 2.793781  | 2.035937  |
| 33 | H | -1.176983 | 3.245955  | -0.292012 |
| 34 | H | -2.329238 | 3.263781  | 1.011733  |
| 35 | H | -1.21914  | -2.996744 | 2.396944  |
| 36 | H | -2.73771  | -3.396407 | 1.422814  |
| 37 | H | -1.824865 | 1.959364  | -2.341126 |
| 38 | H | -3.433943 | 1.221858  | -2.28737  |
| 39 | H | -3.212263 | 2.927299  | -1.874515 |
| 40 | H | 3.538888  | 1.992803  | -0.938918 |
| 41 | H | 3.431414  | 1.445811  | 0.718793  |
| 42 | H | 1.095682  | 2.343786  | -1.03423  |
| 43 | H | 3.163437  | -2.743306 | 0.48782   |
| 44 | H | 2.501446  | -1.608812 | 1.669628  |

|    |   |          |           |           |
|----|---|----------|-----------|-----------|
| 45 | H | 1.863623 | -3.254456 | 1.580603  |
| 46 | H | 1.800247 | -3.434881 | -1.523632 |
| 47 | H | 0.534468 | -4.031427 | -0.437948 |
| 48 | H | 0.130983 | -2.894513 | -1.730518 |
| 49 | H | 0.907089 | 4.180238  | 0.612175  |
| 50 | H | 2.189455 | 3.46681   | 1.599348  |
| 51 | H | 2.556024 | 4.10745   | -0.005762 |

**Sinuausone A (1) Conf. 5 P = 1.248%**

B3LYP/6-326G(d,p) Energy / Hartree = -855.5873318

|    |   |           |           |           |
|----|---|-----------|-----------|-----------|
| 1  | C | 3.366978  | 1.164748  | 0.388285  |
| 2  | C | 2.154214  | 2.014073  | -0.08944  |
| 3  | C | 0.946397  | 1.968204  | 0.840216  |
| 4  | C | -0.27772  | 1.143047  | 0.497972  |
| 5  | C | 3.001725  | -0.278771 | 0.617976  |
| 6  | C | -0.191308 | -0.206583 | -0.271434 |
| 7  | C | -0.124461 | -1.54434  | 0.507503  |
| 8  | C | 0.709336  | -2.608044 | -0.256995 |
| 9  | C | 2.228967  | -2.559553 | 0.056821  |
| 10 | C | 2.881512  | -1.242158 | -0.304743 |
| 11 | C | 0.957599  | 2.684581  | 1.971023  |
| 12 | C | 3.266974  | -1.081374 | -1.754308 |
| 13 | C | -1.490683 | 0.177697  | -1.053483 |
| 14 | C | -2.74396  | -0.609684 | -0.74271  |
| 15 | C | -2.509835 | -2.033132 | -0.281886 |
| 16 | C | -1.52335  | -2.100304 | 0.904099  |
| 17 | C | -1.337684 | 1.666558  | -0.562245 |
| 18 | C | -2.53698  | 2.368956  | 0.072355  |
| 19 | C | -0.766412 | 2.549536  | -1.677105 |
| 20 | O | -3.861988 | -0.154895 | -0.907284 |
| 21 | C | -2.127693 | -1.44913  | 2.159288  |
| 22 | H | -0.827036 | 0.987407  | 1.428771  |
| 23 | H | 0.404669  | -1.343014 | 1.446025  |
| 24 | H | 0.645101  | -0.168322 | -0.965434 |
| 25 | H | -1.384371 | 0.0825    | -2.141431 |
| 26 | H | 4.161362  | 1.265164  | -0.357822 |
| 27 | H | 3.753066  | 1.597203  | 1.316115  |
| 28 | H | 2.485593  | 3.052253  | -0.191904 |
| 29 | H | 1.879313  | 1.676745  | -1.089957 |
| 30 | H | 2.691218  | -0.521835 | 1.631969  |
| 31 | H | 0.359327  | -3.610325 | 0.011262  |
| 32 | H | 0.550322  | -2.510666 | -1.336839 |
| 33 | H | 2.717368  | -3.383194 | -0.477121 |
| 34 | H | 2.359016  | -2.751425 | 1.126812  |
| 35 | H | 0.131576  | 2.654006  | 2.674258  |
| 36 | H | 1.794362  | 3.3262    | 2.231412  |
| 37 | H | 3.689864  | -0.101737 | -1.977562 |
| 38 | H | 4.004292  | -1.842147 | -2.035608 |
| 39 | H | 2.404123  | -1.231901 | -2.413499 |
| 40 | H | -2.094376 | -2.590515 | -1.131463 |
| 41 | H | -3.473631 | -2.481363 | -0.029863 |
| 42 | H | -1.385296 | -3.159537 | 1.144051  |
| 43 | H | -3.304033 | 2.598904  | -0.670938 |
| 44 | H | -3.002669 | 1.767334  | 0.854968  |
| 45 | H | -2.205093 | 3.310508  | 0.523429  |
| 46 | H | -1.545992 | 2.758751  | -2.416471 |
| 47 | H | -0.415943 | 3.506877  | -1.280009 |
| 48 | H | 0.064921  | 2.076014  | -2.203354 |
| 49 | H | -1.430315 | -1.503839 | 2.999537  |
| 50 | H | -2.386998 | -0.397734 | 2.012037  |
| 51 | H | -3.045518 | -1.969121 | 2.449763  |

**Sinuausone B (2) Conf. 1 P = 41.688%**

B3LYP/6-326G(d,p) Energy / Hartree = -855.5814690

| I  | atom | X         | Y         | Z         |
|----|------|-----------|-----------|-----------|
| 1  | C    | 3.723198  | -0.715943 | -0.720139 |
| 2  | C    | 2.769139  | -1.904017 | -0.37145  |
| 3  | C    | 1.594212  | -1.46957  | 0.492465  |
| 4  | C    | 0.342584  | -1.085477 | -0.262032 |
| 5  | C    | 2.944127  | 0.531392  | -1.028805 |
| 6  | C    | -0.654141 | 0.030197  | 0.18779   |
| 7  | C    | -0.751151 | 1.501751  | -0.245625 |
| 8  | C    | 0.336884  | 2.456391  | 0.306814  |
| 9  | C    | 1.645425  | 2.583853  | -0.522958 |
| 10 | C    | 2.692468  | 1.545525  | -0.19099  |
| 11 | C    | 1.695867  | -1.442873 | 1.823656  |
| 12 | C    | 3.366352  | 1.740151  | 1.146134  |
| 13 | C    | -1.769036 | -0.833643 | -0.461218 |
| 14 | C    | -3.091998 | -0.471099 | 0.125345  |
| 15 | C    | -3.352837 | 1.014527  | -0.098563 |
| 16 | C    | -2.173659 | 1.993107  | 0.211373  |
| 17 | C    | -0.894226 | -2.104336 | -0.314176 |
| 18 | C    | -0.904417 | -3.055333 | -1.509733 |
| 19 | C    | -1.139044 | -2.880891 | 0.980891  |
| 20 | O    | -3.860048 | -1.201994 | 0.722757  |
| 21 | C    | -2.558612 | 3.36374   | -0.368879 |
| 22 | H    | -0.757521 | -0.012732 | 1.279055  |
| 23 | H    | -1.804226 | -0.558566 | -1.522859 |
| 24 | H    | 0.608031  | -0.888489 | -1.303574 |
| 25 | H    | -0.718252 | 1.539397  | -1.343708 |
| 26 | H    | 4.391438  | -0.555823 | 0.127613  |
| 27 | H    | 4.350649  | -1.010854 | -1.568419 |
| 28 | H    | 2.391299  | -2.344405 | -1.299559 |
| 29 | H    | 3.350997  | -2.679807 | 0.134451  |
| 30 | H    | 2.414778  | 0.527853  | -1.98085  |
| 31 | H    | -0.088068 | 3.459255  | 0.371958  |
| 32 | H    | 0.572279  | 2.17346   | 1.33804   |
| 33 | H    | 1.397525  | 2.544456  | -1.588531 |
| 34 | H    | 2.059639  | 3.581872  | -0.333029 |
| 35 | H    | 0.89088   | -1.098661 | 2.462741  |
| 36 | H    | 2.607748  | -1.755761 | 2.322809  |
| 37 | H    | 3.819288  | 2.73786   | 1.189907  |
| 38 | H    | 2.64812   | 1.686447  | 1.970288  |
| 39 | H    | 4.146519  | 1.007259  | 1.345154  |
| 40 | H    | -4.233489 | 1.306953  | 0.478114  |
| 41 | H    | -3.615863 | 1.11598   | -1.160671 |
| 42 | H    | -2.124473 | 2.087518  | 1.304474  |
| 43 | H    | -1.864818 | -3.576303 | -1.584129 |
| 44 | H    | -0.737574 | -2.518761 | -2.448227 |
| 45 | H    | -0.122362 | -3.815069 | -1.410905 |
| 46 | H    | -2.102548 | -3.392327 | 0.925933  |
| 47 | H    | -0.357211 | -3.629452 | 1.133455  |
| 48 | H    | -1.159509 | -2.238601 | 1.862939  |
| 49 | H    | -1.876452 | 4.160249  | -0.068366 |
| 50 | H    | -2.574561 | 3.327059  | -1.463283 |
| 51 | H    | -3.5587   | 3.651229  | -0.032274 |

**Sinuausone B (2) Conf. 2 P = 28.638%**

B3LYP/6-326G(d,p) Energy / Hartree = -855.5799537

|   |   |           |           |           |
|---|---|-----------|-----------|-----------|
| 1 | C | -3.249079 | -1.198436 | 0.640389  |
| 2 | C | -2.78579  | 0.279251  | 0.758754  |
| 3 | C | -2.302551 | 0.870444  | -0.561883 |

|                                                   |   |           |           |           |                                                   |   |           |           |           |
|---------------------------------------------------|---|-----------|-----------|-----------|---------------------------------------------------|---|-----------|-----------|-----------|
| 4                                                 | C | -0.834813 | 1.141295  | -0.814518 | 12                                                | C | 3.37825   | 1.511223  | 1.283855  |
| 5                                                 | C | -2.181932 | -2.009853 | -0.038563 | 13                                                | C | -1.798206 | -0.626011 | -0.343014 |
| 6                                                 | C | 0.359883  | 0.266223  | -0.301266 | 14                                                | C | -3.076357 | -0.258388 | 0.339977  |
| 7                                                 | C | 1.188891  | -0.806759 | -1.030761 | 15                                                | C | -3.021152 | 1.18086   | 0.849348  |
| 8                                                 | C | 0.482833  | -2.113968 | -1.464269 | 16                                                | C | -2.045983 | 2.154423  | 0.123269  |
| 9                                                 | C | 0.015375  | -3.099147 | -0.371917 | 17                                                | C | -1.023738 | -1.973055 | -0.341606 |
| 10                                                | C | -1.10778  | -2.579249 | 0.516651  | 18                                                | C | -1.179683 | -2.837202 | -1.59123  |
| 11                                                | C | -3.195046 | 1.208197  | -1.500326 | 19                                                | C | -1.278722 | -2.806597 | 0.914676  |
| 12                                                | C | -0.890448 | -2.718535 | 2.001591  | 20                                                | O | -4.034519 | -0.986961 | 0.517545  |
| 13                                                | C | 1.168793  | 1.588006  | -0.199964 | 21                                                | C | -2.697161 | 2.747433  | -1.135585 |
| 14                                                | C | 2.306595  | 1.411567  | 0.752693  | 22                                                | H | -0.598329 | 0.061581  | 1.335635  |
| 15                                                | C | 3.192261  | 0.257219  | 0.283872  | 23                                                | H | -1.913639 | -0.297265 | -1.385874 |
| 16                                                | C | 2.450363  | -1.05093  | -0.138637 | 24                                                | H | 0.541694  | -0.842605 | -1.343967 |
| 17                                                | C | -0.146261 | 2.40261   | -0.104597 | 25                                                | H | -0.510046 | 1.568896  | -1.305086 |
| 18                                                | C | -0.194432 | 3.687665  | -0.928209 | 26                                                | H | 4.345175  | -0.765724 | 0.139295  |
| 19                                                | C | -0.606046 | 2.686972  | 1.328918  | 27                                                | H | 4.350869  | -1.0907   | -1.58707  |
| 20                                                | O | 2.515542  | 2.039317  | 1.773884  | 28                                                | H | 2.284434  | -2.306171 | -1.488599 |
| 21                                                | C | 3.46971   | -2.000165 | -0.783386 | 29                                                | H | 3.219144  | -2.846665 | -0.10064  |
| 22                                                | H | 0.124302  | -0.085419 | 0.707799  | 30                                                | H | 2.521356  | 0.568559  | -1.962263 |
| 23                                                | H | 1.610542  | 1.764451  | -1.188397 | 31                                                | H | 0.058802  | 3.568158  | 0.233687  |
| 24                                                | H | -0.704746 | 1.294951  | -1.890737 | 32                                                | H | 0.628774  | 2.39429   | 1.392154  |
| 25                                                | H | 1.53681   | -0.348831 | -1.968134 | 33                                                | H | 1.638889  | 2.611854  | -1.503098 |
| 26                                                | H | -3.485734 | -1.570936 | 1.641008  | 34                                                | H | 2.321588  | 3.537627  | -0.172528 |
| 27                                                | H | -4.17527  | -1.238328 | 0.05879   | 35                                                | H | 0.888016  | -1.339578 | 2.401442  |
| 28                                                | H | -1.991145 | 0.318825  | 1.504064  | 36                                                | H | 2.565499  | -2.065918 | 2.170159  |
| 29                                                | H | -3.612483 | 0.883365  | 1.146104  | 37                                                | H | 3.906585  | 2.463216  | 1.415327  |
| 30                                                | H | -2.2259   | -1.978401 | -1.12405  | 38                                                | H | 2.608134  | 1.47157   | 2.060563  |
| 31                                                | H | -0.371553 | -1.839657 | -2.089522 | 39                                                | H | 4.082109  | 0.704239  | 1.480549  |
| 32                                                | H | 1.164218  | -2.652498 | -2.130833 | 40                                                | H | -2.724007 | 1.091638  | 1.90256   |
| 33                                                | H | -0.304925 | -4.022694 | -0.869895 | 41                                                | H | -4.034345 | 1.591013  | 0.858391  |
| 34                                                | H | 0.863879  | -3.389879 | 0.254505  | 42                                                | H | -1.902987 | 2.98064   | 0.825949  |
| 35                                                | H | -2.889894 | 1.60777   | -2.462077 | 43                                                | H | -2.185099 | -3.267904 | -1.641991 |
| 36                                                | H | -4.262703 | 1.093861  | -1.337442 | 44                                                | H | -1.015644 | -2.254707 | -2.502347 |
| 37                                                | H | -0.697712 | -3.766598 | 2.259546  | 45                                                | H | -0.463031 | -3.664861 | -1.585243 |
| 38                                                | H | -0.006101 | -2.156066 | 2.324482  | 46                                                | H | -2.287923 | -3.224541 | 0.875737  |
| 39                                                | H | -1.74074  | -2.376816 | 2.592352  | 47                                                | H | -0.566076 | -3.631912 | 0.986948  |
| 40                                                | H | 3.918408  | 0.033689  | 1.068961  | 48                                                | H | -1.200689 | -2.221107 | 1.833084  |
| 41                                                | H | 3.755433  | 0.63316   | -0.581522 | 49                                                | H | -2.033058 | 3.476084  | -1.60967  |
| 42                                                | H | 2.099209  | -1.516569 | 0.790269  | 50                                                | H | -2.918722 | 1.972818  | -1.87684  |
| 43                                                | H | 0.42669   | 4.466343  | -0.473467 | 51                                                | H | -3.634688 | 3.25661   | -0.893219 |
| 44                                                | H | 0.16214   | 3.52152   | -1.948724 | <b>Sinuausone B (2) Conf. 4 P = 5.883%</b>        |   |           |           |           |
| 45                                                | H | -1.218567 | 4.070541  | -0.986644 | B3LYP/6-326G(d,p) Energy / Hartree = -855.5794143 |   |           |           |           |
| 46                                                | H | 0.007349  | 3.482518  | 1.758102  | 1                                                 | C | -3.582174 | -0.515224 | 0.392273  |
| 47                                                | H | -1.648471 | 3.018534  | 1.341679  | 2                                                 | C | -2.968457 | -1.749657 | -0.348606 |
| 48                                                | H | -0.514841 | 1.821493  | 1.986565  | 3                                                 | C | -1.571033 | -1.525675 | -0.904499 |
| 49                                                | H | 3.058616  | -2.9982   | -0.94587  | 4                                                 | C | -0.492369 | -1.108534 | 0.070362  |
| 50                                                | H | 3.804817  | -1.611069 | -1.750775 | 5                                                 | C | -3.051008 | 0.774194  | -0.170496 |
| 51                                                | H | 4.350872  | -2.108041 | -0.144637 | 6                                                 | C | 0.605383  | -0.079317 | -0.330404 |
| <b>Sinuausone B (2) Conf. 3 P = 18.387%</b>       |   |           |           |           | 7                                                 | C | 0.640623  | 1.442499  | -0.172086 |
| B3LYP/6-326G(d,p) Energy / Hartree = -855.5787587 |   |           |           |           | 8                                                 | C | -0.385729 | 2.193419  | -1.066329 |
| 1                                                 | C | 3.704258  | -0.829077 | -0.74198  | 9                                                 | C | -1.610703 | 2.779979  | -0.322523 |
| 2                                                 | C | 2.68466   | -1.989487 | -0.520342 | 10                                                | C | -2.380184 | 1.735676  | 0.475801  |
| 3                                                 | C | 1.538848  | -1.57643  | 0.391187  | 11                                                | C | -1.345232 | -1.684666 | -2.212807 |
| 4                                                 | C | 0.297087  | -1.063068 | -0.301675 | 12                                                | C | -2.263368 | 1.837108  | 1.976849  |
| 5                                                 | C | 3.001205  | 0.476112  | -0.988282 | 13                                                | C | 1.55508   | -0.815599 | 0.641186  |
| 6                                                 | C | -0.576409 | 0.1133523 | 0.241561  | 14                                                | C | 2.968067  | -0.520898 | 0.251446  |
| 7                                                 | C | -0.598518 | 1.580651  | -0.210453 | 15                                                | C | 3.195278  | 0.992743  | 0.23899   |
| 8                                                 | C | 0.475021  | 2.558429  | 0.319429  | 16                                                | C | 2.114811  | 1.864744  | -0.48022  |
| 9                                                 | C | 1.833036  | 2.587726  | -0.425506 | 17                                                | C | 0.687952  | -2.103095 | 0.513962  |
| 10                                                | C | 2.771924  | 1.44977   | -0.097186 | 18                                                | C | 0.436787  | -2.856433 | 1.818862  |
| 11                                                | C | 1.662199  | -1.668076 | 1.717988  | 19                                                | C | 1.15882   | -3.070607 | -0.572665 |

|    |   |           |           |           |
|----|---|-----------|-----------|-----------|
| 20 | O | 3.830623  | -1.32319  | -0.052824 |
| 21 | C | 2.390064  | 3.338234  | -0.149415 |
| 22 | H | 0.91401   | -0.308896 | -1.35773  |
| 23 | H | 1.398055  | -0.386622 | 1.638956  |
| 24 | H | -0.959659 | -0.769878 | 0.997877  |
| 25 | H | 0.447298  | 1.687489  | 0.879319  |
| 26 | H | -4.672375 | -0.578702 | 0.29463   |
| 27 | H | -3.366668 | -0.583683 | 1.45944   |
| 28 | H | -2.960706 | -2.597265 | 0.347304  |
| 29 | H | -3.621834 | -2.033961 | -1.177613 |
| 30 | H | -3.098    | 0.846814  | -1.256469 |
| 31 | H | 0.105495  | 3.013804  | -1.598363 |
| 32 | H | -0.745712 | 1.507912  | -1.838816 |
| 33 | H | -1.27649  | 3.58301   | 0.343058  |
| 34 | H | -2.266993 | 3.247444  | -1.064896 |
| 35 | H | -0.372429 | -1.527199 | -2.662893 |
| 36 | H | -2.143825 | -1.977314 | -2.886804 |
| 37 | H | -1.21973  | 1.789899  | 2.306499  |
| 38 | H | -2.644672 | 2.809755  | 2.30981   |
| 39 | H | -2.822617 | 1.065996  | 2.506713  |
| 40 | H | 4.17888   | 1.190972  | -0.193441 |
| 41 | H | 3.239013  | 1.299993  | 1.293122  |
| 42 | H | 2.258952  | 1.724238  | -1.559923 |
| 43 | H | 1.349459  | -3.354782 | 2.162121  |
| 44 | H | 0.102337  | -2.181003 | 2.61149   |
| 45 | H | -0.330816 | -3.625337 | 1.683542  |
| 46 | H | 2.067218  | -3.580682 | -0.244095 |
| 47 | H | 0.392438  | -3.824362 | -0.772575 |
| 48 | H | 1.387735  | -2.571847 | -1.515644 |
| 49 | H | 1.727068  | 4.014378  | -0.693232 |
| 50 | H | 2.256129  | 3.523675  | 0.921483  |
| 51 | H | 3.417808  | 3.608325  | -0.408374 |

**Sinuausone B (2) Conf. 5 P = 4.875%**

B3LYP/6-326G(d,p) Energy / Hartree = -855.5794142

|    |   |           |           |           |
|----|---|-----------|-----------|-----------|
| 1  | C | -3.582263 | -0.515095 | 0.392283  |
| 2  | C | -2.968649 | -1.749322 | -0.348878 |
| 3  | C | -1.571095 | -1.525463 | -0.904581 |
| 4  | C | -0.492451 | -1.108472 | 0.070357  |
| 5  | C | -3.051296 | 0.774449  | -0.170414 |
| 6  | C | 0.605353  | -0.07928  | -0.330326 |
| 7  | C | 0.640693  | 1.442567  | -0.171988 |
| 8  | C | -0.385603 | 2.193603  | -1.066149 |
| 9  | C | -1.61073  | 2.780035  | -0.32244  |
| 10 | C | -2.380172 | 1.735725  | 0.475864  |
| 11 | C | -1.345194 | -1.684446 | -2.212873 |
| 12 | C | -2.262861 | 1.836711  | 1.976915  |
| 13 | C | 1.555042  | -0.815672 | 0.641214  |
| 14 | C | 2.968017  | -0.521124 | 0.251277  |
| 15 | C | 3.195371  | 0.992483  | 0.238765  |
| 16 | C | 2.114904  | 1.864688  | -0.480216 |
| 17 | C | 0.687818  | -2.103106 | 0.513999  |
| 18 | C | 0.436597  | -2.856363 | 1.818942  |
| 19 | C | 1.158644  | -3.070685 | -0.572577 |
| 20 | O | 3.830464  | -1.323494 | -0.053069 |
| 21 | C | 2.390422  | 3.338087  | -0.14924  |
| 22 | H | 0.913915  | -0.308799 | -1.357686 |
| 23 | H | 1.39816   | -0.386701 | 1.638996  |
| 24 | H | -0.959756 | -0.769843 | 0.997867  |
| 25 | H | 0.447466  | 1.687534  | 0.87944   |
| 26 | H | -4.672478 | -0.578612 | 0.294781  |
| 27 | H | -3.366593 | -0.583646 | 1.459408  |

|    |   |           |           |           |
|----|---|-----------|-----------|-----------|
| 28 | H | -2.96112  | -2.597201 | 0.346709  |
| 29 | H | -3.621948 | -2.033234 | -1.178076 |
| 30 | H | -3.098651 | 0.847249  | -1.256366 |
| 31 | H | 0.105624  | 3.014133  | -1.597945 |
| 32 | H | -0.745478 | 1.5088247 | -1.838827 |
| 33 | H | -1.276662 | 3.583154  | 0.343107  |
| 34 | H | -2.266985 | 3.247341  | -1.064935 |
| 35 | H | -0.372318 | -1.527123 | -2.66285  |
| 36 | H | -2.143745 | -1.976952 | -2.886978 |
| 37 | H | -1.219169 | 1.788889  | 2.306308  |
| 38 | H | -2.643584 | 2.80945   | 2.310246  |
| 39 | H | -2.822342 | 1.065722  | 2.506713  |
| 40 | H | 4.178926  | 1.190613  | -0.193818 |
| 41 | H | 3.239344  | 1.299699  | 1.292903  |
| 42 | H | 2.258926  | 1.724298  | -1.559949 |
| 43 | H | 1.349235  | -3.35476  | 2.16221   |
| 44 | H | 0.102204  | -2.18086  | 2.611526  |
| 45 | H | -0.331062 | -3.625218 | 1.683663  |
| 46 | H | 2.066966  | -3.580876 | -0.243976 |
| 47 | H | 0.392177  | -3.824344 | -0.772514 |
| 48 | H | 1.387666  | -2.571967 | -1.515548 |
| 49 | H | 1.727494  | 4.014411  | -0.692908 |
| 50 | H | 2.256623  | 3.523405  | 0.921693  |
| 51 | H | 3.418187  | 3.608026  | -0.408261 |

**Isolobophytumin E (3) Conf. 1 P = 22.602%**

B3LYP/6-326G(d,p) Energy / Hartree = -855.5983840

| I  | atom | X         | Y         | Z         |
|----|------|-----------|-----------|-----------|
| 1  | C    | 2.743259  | -1.848181 | -1.452695 |
| 2  | C    | 1.243973  | -1.832352 | -1.217377 |
| 3  | C    | 0.983748  | -1.403425 | 0.207225  |
| 4  | C    | 2.347512  | -1.566923 | 0.961375  |
| 5  | C    | 3.349904  | -2.137176 | -0.060533 |
| 6  | C    | 2.345256  | -0.034513 | 1.316344  |
| 7  | C    | 0.977726  | 0.133131  | 0.573878  |
| 8  | C    | 1.143526  | 1.235434  | -0.501119 |
| 9  | C    | 2.398998  | 2.002394  | -0.016226 |
| 10 | C    | 3.317997  | 0.927873  | 0.594037  |
| 11 | C    | 0.320057  | -2.229940 | -2.092924 |
| 12 | C    | 2.305119  | 0.230066  | 2.820528  |
| 13 | H    | 0.153351  | 0.372527  | 1.246545  |
| 14 | H    | 2.306164  | -2.185516 | 1.860250  |
| 15 | H    | 0.127753  | -1.932671 | 0.628752  |
| 16 | C    | -0.096210 | 2.131478  | -0.728270 |
| 17 | C    | 0.188708  | 3.223013  | -1.773051 |
| 18 | C    | -1.334555 | 1.312983  | -1.141300 |
| 19 | C    | -2.280855 | 0.888516  | -0.018820 |
| 20 | C    | -3.326088 | -0.069704 | -0.441898 |
| 21 | O    | -2.180104 | 1.350533  | 1.111718  |
| 22 | C    | -4.272384 | -0.667486 | 0.313685  |
| 23 | C    | -5.242112 | -1.627321 | -0.321637 |
| 24 | C    | -4.462067 | -0.466729 | 1.790495  |
| 25 | H    | 1.380608  | 0.766815  | -1.465072 |
| 26 | H    | 3.069155  | -0.866053 | -1.814781 |
| 27 | H    | 3.037478  | -2.578177 | -2.210077 |
| 28 | H    | 3.422222  | -3.219883 | 0.083090  |
| 29 | H    | 4.359047  | -1.732314 | 0.054380  |
| 30 | H    | 2.889742  | 2.567264  | -0.812507 |
| 31 | H    | 2.104580  | 2.723392  | 0.756852  |
| 32 | H    | 4.060971  | 1.352972  | 1.275095  |

|    |   |           |           |           |
|----|---|-----------|-----------|-----------|
| 33 | H | 3.875490  | 0.425246  | -0.200276 |
| 34 | H | -0.736373 | -2.227723 | -1.844005 |
| 35 | H | 0.588155  | -2.576143 | -3.086441 |
| 36 | H | 2.122396  | 1.289176  | 3.031305  |
| 37 | H | 1.510627  | -0.348025 | 3.303061  |
| 38 | H | 3.255124  | -0.047289 | 3.291022  |
| 39 | H | -0.333185 | 2.620745  | 0.223222  |
| 40 | H | -0.687720 | 3.862055  | -1.916049 |
| 41 | H | 1.019926  | 3.864435  | -1.472254 |
| 42 | H | 0.441431  | 2.782141  | -2.743909 |
| 43 | H | -1.962517 | 1.898223  | -1.828019 |
| 44 | H | -1.048600 | 0.424829  | -1.715320 |
| 45 | H | -3.302510 | -0.318959 | -1.499055 |
| 46 | H | -6.272123 | -1.299025 | -0.143678 |
| 47 | H | -5.086538 | -1.723891 | -1.396759 |
| 48 | H | -5.149951 | -2.618451 | 0.136322  |
| 49 | H | -5.447579 | -0.022276 | 1.973872  |
| 50 | H | -4.465525 | -1.437699 | 2.297990  |
| 51 | H | -3.699844 | 0.173192  | 2.222389  |

**Isolobophytumin E (3) Conf. 2 P = 8.343%**

B3LYP/6-326G(d,p) Energy / Hartree = -855.5972311

|    |   |           |           |           |
|----|---|-----------|-----------|-----------|
| 1  | C | -3.466242 | -0.892089 | 1.148646  |
| 2  | C | -2.016546 | -1.213625 | 1.465136  |
| 3  | C | -1.246571 | -1.321223 | 0.168279  |
| 4  | C | -2.321882 | -1.429645 | -0.964901 |
| 5  | C | -3.697539 | -1.458968 | -0.270570 |
| 6  | C | -1.778074 | -0.106438 | -1.619177 |
| 7  | C | -0.677870 | -0.015235 | -0.507768 |
| 8  | C | -0.786052 | 1.369650  | 0.173827  |
| 9  | C | -1.599854 | 2.198749  | -0.853052 |
| 10 | C | -2.589654 | 1.203214  | -1.484581 |
| 11 | C | -1.521793 | -1.442049 | 2.682007  |
| 12 | C | -1.256831 | -0.304914 | -3.041140 |
| 13 | H | 0.329251  | -0.184250 | -0.896838 |
| 14 | H | -2.199367 | -2.283327 | -1.634769 |
| 15 | H | -0.503007 | -2.116471 | 0.216839  |
| 16 | C | 0.555856  | 2.025359  | 0.572534  |
| 17 | C | 0.340245  | 3.438890  | 1.140595  |
| 18 | C | 1.355285  | 1.190058  | 1.608477  |
| 19 | C | 2.106552  | -0.038402 | 1.106267  |
| 20 | C | 3.150917  | 0.231472  | 0.091297  |
| 21 | O | 1.874277  | -1.145086 | 1.582253  |
| 22 | C | 3.963247  | -0.647165 | -0.534912 |
| 23 | C | 4.975582  | -0.151163 | -1.532282 |
| 24 | C | 3.958354  | -2.135459 | -0.330443 |
| 25 | H | -1.383803 | 1.274002  | 1.088891  |
| 26 | H | -3.608770 | 0.195155  | 1.153433  |
| 27 | H | -4.154358 | -1.302220 | 1.891496  |
| 28 | H | -4.031783 | -2.498544 | -0.194883 |
| 29 | H | -4.469429 | -0.915664 | -0.822714 |
| 30 | H | -2.104371 | 3.057603  | -0.404285 |
| 31 | H | -0.921435 | 2.589022  | -1.622229 |
| 32 | H | -2.976100 | 1.551900  | -2.446534 |
| 33 | H | -3.452760 | 1.077756  | -0.827330 |
| 34 | H | -0.470196 | -1.666147 | 2.824154  |
| 35 | H | -2.149040 | -1.395987 | 3.567473  |
| 36 | H | -0.725702 | 0.584826  | -3.396209 |
| 37 | H | -0.563961 | -1.150692 | -3.094028 |
| 38 | H | -2.081496 | -0.502936 | -3.734978 |
| 39 | H | 1.158790  | 2.121847  | -0.339455 |
| 40 | H | 1.296542  | 3.908195  | 1.388197  |

|    |   |           |           |           |
|----|---|-----------|-----------|-----------|
| 41 | H | -0.173704 | 4.087532  | 0.428655  |
| 42 | H | -0.260456 | 3.402765  | 2.055968  |
| 43 | H | 2.119554  | 1.845046  | 2.046793  |
| 44 | H | 0.696872  | 0.868704  | 2.418508  |
| 45 | H | 3.271604  | 1.280560  | -0.161617 |
| 46 | H | 4.792785  | -0.602370 | -2.513936 |
| 47 | H | 4.956468  | 0.934113  | -1.638448 |
| 48 | H | 5.984538  | -0.457109 | -1.234367 |
| 49 | H | 4.942233  | -2.457558 | 0.030524  |
| 50 | H | 3.198268  | -2.451863 | 0.375809  |
| 51 | H | 3.805849  | -2.639295 | -1.291596 |

**Isolobophytumin E (3) Conf. 3 P = 8.311%**

B3LYP/6-326G(d,p) Energy / Hartree = -855.6004695

|    |   |           |           |           |
|----|---|-----------|-----------|-----------|
| 1  | C | 3.282502  | 1.896357  | 1.123066  |
| 2  | C | 1.970623  | 2.116016  | 0.391425  |
| 3  | C | 1.944674  | 1.228451  | -0.830686 |
| 4  | C | 3.424578  | 0.770958  | -1.063433 |
| 5  | C | 4.274950  | 1.462040  | 0.020048  |
| 6  | C | 2.992660  | -0.734011 | -0.909886 |
| 7  | C | 1.510641  | -0.282496 | -0.687783 |
| 8  | C | 1.019465  | -0.876451 | 0.654788  |
| 9  | C | 2.022353  | -2.029738 | 0.908712  |
| 10 | C | 3.370218  | -1.515969 | 0.370832  |
| 11 | C | 1.043052  | 3.015016  | 0.721118  |
| 12 | C | 3.241174  | -1.561481 | -2.169771 |
| 13 | H | 0.845779  | -0.577007 | -1.505095 |
| 14 | H | 3.817543  | 0.973773  | -2.061763 |
| 15 | H | 1.451259  | 1.723728  | -1.668434 |
| 16 | C | -0.459958 | -1.317051 | 0.656074  |
| 17 | C | -0.849952 | -2.013379 | 1.970108  |
| 18 | C | -1.396859 | -0.132856 | 0.383058  |
| 19 | C | -2.821009 | -0.502376 | -0.025533 |
| 20 | C | -3.759700 | 0.641473  | -0.055843 |
| 21 | O | -3.115191 | -1.654204 | -0.322824 |
| 22 | C | -5.078770 | 0.639614  | -0.343866 |
| 23 | C | -5.855353 | 1.928479  | -0.307002 |
| 24 | C | -5.887138 | -0.573049 | -0.709318 |
| 25 | H | 1.145183  | -0.131241 | 1.450749  |
| 26 | H | 3.161297  | 1.097462  | 1.864326  |
| 27 | H | 3.608106  | 2.785431  | 1.667647  |
| 28 | H | 4.743492  | 2.350939  | -0.413886 |
| 29 | H | 5.081819  | 0.830540  | 0.401745  |
| 30 | H | 2.076045  | -2.325896 | 1.959043  |
| 31 | H | 1.706369  | -2.912929 | 0.339493  |
| 32 | H | 4.075614  | -2.326793 | 0.167555  |
| 33 | H | 3.841673  | -0.870771 | 1.115961  |
| 34 | H | 0.139361  | 3.139947  | 0.133219  |
| 35 | H | 1.155445  | 3.657142  | 1.589326  |
| 36 | H | 2.768714  | -2.546827 | -2.095716 |
| 37 | H | 2.837672  | -1.063936 | -3.057417 |
| 38 | H | 4.314202  | -1.714821 | -2.330142 |
| 39 | H | -0.592717 | -2.036835 | -0.160834 |
| 40 | H | -1.902952 | -2.301918 | 1.959048  |
| 41 | H | -0.260806 | -2.917836 | 2.136877  |
| 42 | H | -0.689021 | -1.346188 | 2.824406  |
| 43 | H | -1.442972 | 0.532147  | 1.254077  |
| 44 | H | -1.008780 | 0.494370  | -0.430257 |
| 45 | H | -3.307262 | 1.595787  | 0.199219  |
| 46 | H | -6.667203 | 1.861467  | 0.425777  |
| 47 | H | -5.227389 | 2.783645  | -0.054438 |
| 48 | H | -6.328775 | 2.114678  | -1.277360 |



|    |   |           |           |           |
|----|---|-----------|-----------|-----------|
| 49 | H | -6.308695 | -0.442050 | -1.712859 |
| 50 | H | -5.299091 | -1.484494 | -0.685286 |
| 51 | H | -6.741288 | -0.665161 | -0.029029 |

**Isolobophytumin E (3) Conf. 4 P = 8.224%**

B3LYP/6-326G(d,p) Energy / Hartree = -855.5940797

|    |   |           |           |           |
|----|---|-----------|-----------|-----------|
| 1  | C | 0.870084  | -2.983433 | -0.242261 |
| 2  | C | 0.719244  | -2.085513 | 0.974655  |
| 3  | C | 1.969156  | -1.237792 | 1.070052  |
| 4  | C | 2.801260  | -1.492677 | -0.223854 |
| 5  | C | 1.828289  | -2.218128 | -1.179780 |
| 6  | C | 3.063226  | 0.056663  | -0.351024 |
| 7  | C | 1.976079  | 0.302974  | 0.752156  |
| 8  | C | 0.784321  | 0.965438  | 0.027164  |
| 9  | C | 1.467724  | 1.752377  | -1.116880 |
| 10 | C | 2.601793  | 0.829301  | -1.611134 |
| 11 | C | -0.317906 | -2.072026 | 1.811366  |
| 12 | C | 4.483822  | 0.423248  | 0.074589  |
| 13 | H | 2.317809  | 0.911340  | 1.592045  |
| 14 | H | 3.715087  | -2.078174 | -0.091947 |
| 15 | H | 2.510922  | -1.437211 | 1.997666  |
| 16 | C | -0.190828 | 1.766995  | 0.924528  |
| 17 | C | 0.459070  | 2.925199  | 1.699323  |
| 18 | C | -1.396750 | 2.328054  | 0.118906  |
| 19 | C | -2.228282 | 1.271008  | -0.593713 |
| 20 | C | -3.167664 | 0.520185  | 0.267307  |
| 21 | O | -2.091299 | 1.092107  | -1.800616 |
| 22 | C | -4.041472 | -0.448151 | -0.084987 |
| 23 | C | -4.923506 | -1.077571 | 0.959173  |
| 24 | C | -4.232770 | -0.980153 | -1.476661 |
| 25 | H | 0.192832  | 0.171039  | -0.440649 |
| 26 | H | -0.085271 | -3.239129 | -0.706919 |
| 27 | H | 1.339464  | -3.925403 | 0.070853  |
| 28 | H | 2.342994  | -2.877671 | -1.882243 |
| 29 | H | 1.251210  | -1.507203 | -1.776022 |
| 30 | H | 0.768503  | 2.019538  | -1.912114 |
| 31 | H | 1.895921  | 2.683752  | -0.730596 |
| 32 | H | 3.421768  | 1.397337  | -2.059329 |
| 33 | H | 2.230657  | 0.153682  | -2.385831 |
| 34 | H | -0.345933 | -1.413115 | 2.673416  |
| 35 | H | -1.175696 | -2.721078 | 1.665486  |
| 36 | H | 4.588210  | 1.506360  | 0.197605  |
| 37 | H | 4.750494  | -0.049057 | 1.025542  |
| 38 | H | 5.212507  | 0.097269  | -0.675693 |
| 39 | H | -0.587499 | 1.060795  | 1.663964  |
| 40 | H | -0.273274 | 3.390873  | 2.364617  |
| 41 | H | 1.293433  | 2.587465  | 2.317386  |
| 42 | H | 0.832357  | 3.702343  | 1.026552  |
| 43 | H | -2.043861 | 2.876416  | 0.811877  |
| 44 | H | -1.039294 | 3.031997  | -0.635880 |
| 45 | H | -3.143228 | 0.809281  | 1.314032  |
| 46 | H | -4.751602 | -2.158993 | 0.998539  |
| 47 | H | -4.752967 | -0.660569 | 1.952329  |
| 48 | H | -5.978774 | -0.941520 | 0.697584  |
| 49 | H | -4.047954 | -2.060526 | -1.484865 |
| 50 | H | -5.277387 | -0.846695 | -1.780551 |
| 51 | H | -3.580381 | -0.495976 | -2.195458 |

**Isolobophytumin E (3) Conf. 5 P = 6.455%**

B3LYP/6-326G(d,p) Energy / Hartree = -855.5993168

|   |   |          |          |           |
|---|---|----------|----------|-----------|
| 1 | C | 3.767010 | 1.660605 | 0.034382  |
| 2 | C | 2.495698 | 1.798923 | -0.783380 |
| 3 | C | 2.117826 | 0.439440 | -1.323748 |

|    |   |           |           |           |
|----|---|-----------|-----------|-----------|
| 4  | C | 3.393116  | -0.456857 | -1.168353 |
| 5  | C | 4.496865  | 0.445448  | -0.582536 |
| 6  | C | 2.593087  | -1.450949 | -0.247065 |
| 7  | C | 1.313326  | -0.565017 | -0.410614 |
| 8  | C | 0.812609  | -0.172525 | 0.999912  |
| 9  | C | 1.493494  | -1.221327 | 1.915197  |
| 10 | C | 2.869936  | -1.479702 | 1.275084  |
| 11 | C | 1.874061  | 2.945990  | -1.057199 |
| 12 | C | 2.490680  | -2.859084 | -0.829921 |
| 13 | H | 0.519629  | -1.059342 | -0.978548 |
| 14 | H | 3.727909  | -0.945280 | -2.085700 |
| 15 | H | 1.696204  | 0.515956  | -2.327144 |
| 16 | C | -0.723866 | -0.113785 | 1.143026  |
| 17 | C | -1.154699 | 0.154381  | 2.593071  |
| 18 | C | -1.321591 | 0.952295  | 0.187576  |
| 19 | C | -2.842841 | 0.940421  | 0.144288  |
| 20 | C | -3.443600 | -0.185425 | -0.604406 |
| 21 | O | -3.481410 | 1.821885  | 0.711269  |
| 22 | C | -4.750323 | -0.495284 | -0.750480 |
| 23 | C | -5.150009 | -1.693784 | -1.568254 |
| 24 | C | -5.896414 | 0.269683  | -0.151898 |
| 25 | H | 1.201187  | 0.819184  | 1.262870  |
| 26 | H | 3.511622  | 1.461742  | 1.081898  |
| 27 | H | 4.368138  | 2.572524  | 0.024485  |
| 28 | H | 5.141373  | 0.787531  | -1.398368 |
| 29 | H | 5.139054  | -0.071847 | 0.135338  |
| 30 | H | 1.571257  | -0.893755 | 2.954497  |
| 31 | H | 0.900936  | -2.144757 | 1.910962  |
| 32 | H | 3.308482  | -2.428100 | 1.598078  |
| 33 | H | 3.567545  | -0.694408 | 1.575283  |
| 34 | H | 0.981275  | 2.975273  | -1.673659 |
| 35 | H | 2.235323  | 3.895119  | -0.673211 |
| 36 | H | 1.782395  | -3.471872 | -0.262056 |
| 37 | H | 2.150900  | -2.833245 | -1.870147 |
| 38 | H | 3.463788  | -3.362075 | -0.807116 |
| 39 | H | -1.115624 | -1.095940 | 0.845600  |
| 40 | H | -2.241851 | 0.216148  | 2.683847  |
| 41 | H | -0.812024 | -0.637084 | 3.262675  |
| 42 | H | -0.739067 | 1.102532  | 2.951042  |
| 43 | H | -1.005341 | 1.948107  | 0.507306  |
| 44 | H | -0.941733 | 0.782603  | -0.824590 |
| 45 | H | -2.722400 | -0.834926 | -1.092134 |
| 46 | H | -5.816367 | -1.391396 | -2.383715 |
| 47 | H | -4.289622 | -2.211581 | -1.993755 |
| 48 | H | -5.716299 | -2.401573 | -0.952740 |
| 49 | H | -6.524357 | -0.408204 | 0.437077  |
| 50 | H | -5.562393 | 1.095006  | 0.467968  |
| 51 | H | -6.534835 | 0.657886  | -0.954287 |

**Isolobophytumin E (3) Conf. 6 P = 5.966%**

B3LYP/6-326G(d,p) Energy / Hartree = -855.6004694

|    |   |          |           |           |
|----|---|----------|-----------|-----------|
| 1  | C | 3.282626 | 1.896128  | 1.123183  |
| 2  | C | 1.970970 | 2.116063  | 0.391247  |
| 3  | C | 1.945063 | 1.228359  | -0.830768 |
| 4  | C | 3.424944 | 0.770615  | -1.063233 |
| 5  | C | 4.275211 | 1.461650  | 0.020351  |
| 6  | C | 2.992763 | -0.734272 | -0.909631 |
| 7  | C | 1.510790 | -0.282509 | -0.687756 |
| 8  | C | 1.019368 | -0.876280 | 0.654814  |
| 9  | C | 2.022043 | -2.029708 | 0.908939  |
| 10 | C | 3.370054 | -1.516216 | 0.371164  |
| 11 | C | 1.043577 | 3.015398  | 0.720533  |

|                                                   |   |           |           |           |                                                   |   |           |           |           |
|---------------------------------------------------|---|-----------|-----------|-----------|---------------------------------------------------|---|-----------|-----------|-----------|
| 12                                                | C | 3.241299  | -1.561837 | -2.169458 | 20                                                | C | 3.794815  | 0.549392  | 0.369279  |
| 13                                                | H | 0.845985  | -0.577027 | -1.505114 | 21                                                | O | 2.253996  | -0.428149 | -1.187163 |
| 14                                                | H | 3.818137  | 0.973299  | -2.061501 | 22                                                | C | 4.756022  | -0.390258 | 0.498327  |
| 15                                                | H | 1.451843  | 1.723606  | -1.668651 | 23                                                | C | 5.932120  | -0.139137 | 1.403265  |
| 16                                                | C | -0.460097 | -1.316689 | 0.655932  | 24                                                | C | 4.771013  | -1.720985 | -0.199071 |
| 17                                                | C | -0.850376 | -2.012767 | 1.970019  | 25                                                | H | -0.141437 | -0.089516 | 0.169852  |
| 18                                                | C | -1.396896 | -0.132459 | 0.382617  | 26                                                | H | -1.078892 | -1.955803 | 1.378615  |
| 19                                                | C | -2.820962 | -0.502065 | -0.026267 | 27                                                | H | -1.579592 | -3.571343 | 0.902370  |
| 20                                                | C | -3.759734 | 0.641728  | -0.056735 | 28                                                | H | -3.899791 | -2.930318 | 0.780266  |
| 21                                                | O | -3.115073 | -1.653901 | -0.323545 | 29                                                | H | -3.398375 | -1.877077 | 2.096153  |
| 22                                                | C | -5.079019 | 0.639498  | -0.343728 | 30                                                | H | -0.190755 | 1.473335  | 2.033385  |
| 23                                                | C | -5.855760 | 1.928283  | -0.307179 | 31                                                | H | -1.247373 | 2.576905  | 1.158560  |
| 24                                                | C | -5.887523 | -0.573535 | -0.707662 | 32                                                | H | -2.822796 | 1.340395  | 2.545220  |
| 25                                                | H | 1.145080  | -0.131023 | 1.450731  | 33                                                | H | -1.978163 | -0.169719 | 2.262623  |
| 26                                                | H | 3.161095  | 1.097213  | 1.864374  | 34                                                | H | -0.694981 | -2.413504 | -2.617475 |
| 27                                                | H | 3.608294  | 2.785108  | 1.667877  | 35                                                | H | -0.188911 | -3.607103 | -1.298943 |
| 28                                                | H | 4.743885  | 2.350497  | -0.413550 | 36                                                | H | -3.822237 | 2.598656  | 0.468458  |
| 29                                                | H | 5.081983  | 0.830109  | 0.402192  | 37                                                | H | -4.693790 | 1.506987  | -0.616869 |
| 30                                                | H | 2.075576  | -2.325787 | 1.959301  | 38                                                | H | -4.977493 | 1.430860  | 1.128643  |
| 31                                                | H | 1.705967  | -2.912893 | 0.339759  | 39                                                | H | 0.380388  | 1.094104  | -1.904099 |
| 32                                                | H | 4.075305  | -2.327200 | 0.168007  | 40                                                | H | 0.413005  | 3.519036  | -2.095466 |
| 33                                                | H | 3.841586  | -0.871080 | 1.116304  | 41                                                | H | -1.240376 | 3.049289  | -1.706451 |
| 34                                                | H | 0.140103  | 3.140493  | 0.132335  | 42                                                | H | -0.200967 | 3.738415  | -0.457690 |
| 35                                                | H | 1.155906  | 3.657646  | 1.588658  | 43                                                | H | 2.285478  | 2.533791  | -0.926771 |
| 36                                                | H | 2.768662  | -2.547102 | -2.095430 | 44                                                | H | 1.686482  | 2.121324  | 0.652369  |
| 37                                                | H | 2.837996  | -1.064255 | -3.057172 | 45                                                | H | 3.916394  | 1.466670  | 0.938597  |
| 38                                                | H | 4.314323  | -1.715360 | -2.329681 | 46                                                | H | 6.868039  | -0.209628 | 0.837954  |
| 39                                                | H | -0.592834 | -2.036576 | -0.160886 | 47                                                | H | 5.885508  | 0.839820  | 1.881670  |
| 40                                                | H | -1.903420 | -2.301154 | 1.958873  | 48                                                | H | 5.982810  | -0.908176 | 2.182105  |
| 41                                                | H | -0.261404 | -2.917297 | 2.137020  | 49                                                | H | 5.671494  | -1.797946 | -0.819601 |
| 42                                                | H | -0.689468 | -1.345469 | 2.824238  | 50                                                | H | 4.842013  | -2.524463 | 0.542825  |
| 43                                                | H | -1.443302 | 0.532538  | 1.253627  | 51                                                | H | 3.893562  | -1.872824 | -0.818671 |
| 44                                                | H | -1.008591 | 0.494754  | -0.430589 | <b>Isolobophytumin E (3) Conf. 8 P = 5.464%</b>   |   |           |           |           |
| 45                                                | H | -3.307213 | 1.596224  | 0.197500  | B3LYP/6-326G(d,p) Energy / Hartree = -855.5973684 |   |           |           |           |
| 46                                                | H | -6.667226 | 1.861601  | 0.426048  | 1                                                 | C | -1.263884 | -2.510704 | 0.792434  |
| 47                                                | H | -5.227778 | 2.783691  | -0.055478 | 2                                                 | C | -0.775944 | -2.090487 | -0.583114 |
| 48                                                | H | -6.329692 | 2.113827  | -1.277418 | 3                                                 | C | -1.801928 | -1.170079 | -1.201485 |
| 49                                                | H | -6.741722 | -0.664701 | -0.027319 | 4                                                 | C | -3.106577 | -1.339638 | -0.351768 |
| 50                                                | H | -6.308979 | -0.443769 | -1.711412 | 5                                                 | C | -2.805164 | -2.415636 | 0.709121  |
| 51                                                | H | -5.299548 | -1.485004 | -0.682581 | 6                                                 | C | -3.076861 | 0.190469  | 0.017028  |
| <b>Isolobophytumin E (3) Conf. 7 P = 5.675%</b>   |   |           |           |           | 7                                                 | C | -1.782018 | 0.366523  | -0.843661 |
| B3LYP/6-326G(d,p) Energy / Hartree = -855.5976712 |   |           |           |           | 8                                                 | C | -0.686761 | 0.965487  | 0.067774  |
| 1                                                 | C | -1.772497 | -2.509378 | 0.734915  | 9                                                 | C | -1.495776 | 1.600511  | 1.225564  |
| 2                                                 | C | -1.558077 | -2.105070 | -0.712789 | 10                                                | C | -2.671593 | 0.628826  | 1.446522  |
| 3                                                 | C | -2.468548 | -0.942249 | -1.030529 | 11                                                | C | 0.332466  | -2.531077 | -1.178775 |
| 4                                                 | C | -3.538946 | -0.909423 | 0.112241  | 12                                                | C | -4.303750 | 0.952239  | -0.480472 |
| 5                                                 | C | -3.232932 | -2.101838 | 1.038941  | 13                                                | H | -1.937887 | 0.973096  | -1.738333 |
| 6                                                 | C | -3.091984 | 0.546995  | 0.503354  | 14                                                | H | -3.999862 | -1.592735 | -0.926424 |
| 7                                                 | C | -2.038103 | 0.529703  | -0.653817 | 15                                                | H | -1.894904 | -1.345190 | -2.274393 |
| 8                                                 | C | -0.651727 | 0.854626  | -0.046660 | 16                                                | C | 0.334893  | 1.882289  | -0.649060 |
| 9                                                 | C | -1.007805 | 1.519175  | 1.308438  | 17                                                | C | -0.268759 | 3.167322  | -1.237686 |
| 10                                                | C | -2.265541 | 0.774126  | 1.793391  | 18                                                | C | 1.521040  | 2.264159  | 0.279427  |
| 11                                                | C | -0.777959 | -2.741595 | -1.586150 | 19                                                | C | 2.351914  | 1.075914  | 0.741306  |
| 12                                                | C | -4.208868 | 1.579507  | 0.361863  | 20                                                | C | 3.297053  | 0.542097  | -0.263586 |
| 13                                                | H | -2.285845 | 1.213340  | -1.468541 | 21                                                | O | 2.206436  | 0.625943  | 1.874270  |
| 14                                                | H | -4.576284 | -0.930256 | -0.228098 | 22                                                | C | 4.166790  | -0.484138 | -0.138351 |
| 15                                                | H | -2.850147 | -1.010259 | -2.050437 | 23                                                | C | 5.057401  | -0.857197 | -1.292431 |
| 16                                                | C | 0.296532  | 1.663033  | -0.971783 | 24                                                | C | 4.345472  | -1.323978 | 1.094057  |
| 17                                                | C | -0.217684 | 3.069376  | -1.323114 | 25                                                | H | -0.112597 | 0.137509  | 0.494337  |
| 18                                                | C | 1.713421  | 1.767389  | -0.383819 | 26                                                | H | -0.876954 | -1.817101 | 1.548288  |
| 19                                                | C | 2.568593  | 0.504979  | -0.458492 | 27                                                | H | -0.911054 | -3.506381 | 1.070420  |

|                                                   |   |           |           |           |                                                   |   |           |           |           |
|---------------------------------------------------|---|-----------|-----------|-----------|---------------------------------------------------|---|-----------|-----------|-----------|
| 28                                                | H | -3.208072 | -3.372965 | 0.364025  | 36                                                | H | 4.340713  | 1.628393  | -1.072857 |
| 29                                                | H | -3.268113 | -2.205435 | 1.677076  | 37                                                | H | 4.857671  | 0.298889  | -0.026118 |
| 30                                                | H | -0.896952 | 1.746241  | 2.128018  | 38                                                | H | 4.830445  | 0.080513  | -1.781206 |
| 31                                                | H | -1.881251 | 2.581460  | 0.928615  | 39                                                | H | -0.100066 | 1.450232  | 1.878708  |
| 32                                                | H | -3.501526 | 1.091413  | 1.988104  | 40                                                | H | 0.171223  | 3.867534  | 1.895877  |
| 33                                                | H | -2.338174 | -0.219893 | 2.048103  | 41                                                | H | 1.714531  | 3.168693  | 1.410290  |
| 34                                                | H | 0.608092  | -2.207243 | -2.177548 | 42                                                | H | 0.657861  | 3.904242  | 0.201759  |
| 35                                                | H | 1.002280  | -3.230998 | -0.688817 | 43                                                | H | -1.934890 | 2.962423  | 1.106596  |
| 36                                                | H | -4.170978 | 2.033775  | -0.369545 | 44                                                | H | -1.512523 | 2.605739  | -0.565202 |
| 37                                                | H | -4.496269 | 0.746650  | -1.538371 | 45                                                | H | -2.689646 | 0.993817  | -1.576461 |
| 38                                                | H | -5.197167 | 0.664515  | 0.084915  | 46                                                | H | -5.524493 | -0.685607 | -2.253590 |
| 39                                                | H | 0.744078  | 1.299608  | -1.484095 | 47                                                | H | -3.957803 | -0.267682 | -2.978986 |
| 40                                                | H | 0.470257  | 3.683885  | -1.856319 | 48                                                | H | -4.281421 | -1.915195 | -2.397103 |
| 41                                                | H | -1.137473 | 2.960611  | -1.866948 | 49                                                | H | -5.620512 | -1.315739 | 0.208183  |
| 42                                                | H | -0.581343 | 3.860301  | -0.451754 | 50                                                | H | -4.204864 | -2.350341 | 0.200010  |
| 43                                                | H | 2.171239  | 2.960200  | -0.261250 | 51                                                | H | -4.233564 | -0.938836 | 1.272292  |
| 44                                                | H | 1.144649  | 2.774926  | 1.168605  | <b>Isolobophytumin E (3) Conf. 10 P = 4.176%</b>  |   |           |           |           |
| 45                                                | H | 3.281973  | 1.065935  | -1.215060 | B3LYP/6-326G(d,p) Energy / Hartree = -855.5940796 |   |           |           |           |
| 46                                                | H | 4.884187  | -1.899279 | -1.583124 | 1                                                 | C | -0.870335 | -2.983465 | 0.242312  |
| 47                                                | H | 4.897077  | -0.220258 | -2.163100 | 2                                                 | C | -0.719675 | -2.085625 | -0.974683 |
| 48                                                | H | 6.110368  | -0.789417 | -0.997086 | 3                                                 | C | -1.969530 | -1.237792 | -1.069865 |
| 49                                                | H | 4.176890  | -2.378280 | 0.846916  | 4                                                 | C | -2.801388 | -1.492528 | 0.224228  |
| 50                                                | H | 5.383551  | -1.253025 | 1.438974  | 5                                                 | C | -1.828278 | -2.218025 | 1.179988  |
| 51                                                | H | 3.676367  | -1.026880 | 1.894553  | 6                                                 | C | -3.063181 | 0.056853  | 0.351356  |
| <b>Isolobophytumin E (3) Conf. 9 P = 4.975%</b>   |   |           |           |           | 7                                                 | C | -1.976224 | 0.302988  | -0.752042 |
| B3LYP/6-326G(d,p) Energy / Hartree = -855.5934597 |   |           |           |           | 8                                                 | C | -0.784265 | 0.965383  | -0.027315 |
| 1                                                 | C | 1.056321  | -2.963815 | 0.453291  | 9                                                 | C | -1.467408 | 1.752498  | 1.116764  |
| 2                                                 | C | 1.143329  | -1.825161 | 1.456358  | 10                                                | C | -2.601423 | 0.829534  | 1.611328  |
| 3                                                 | C | 2.294813  | -0.937623 | 1.033508  | 11                                                | C | 0.317302  | -2.072261 | -1.811610 |
| 4                                                 | C | 2.776347  | -1.441178 | -0.361525 | 12                                                | C | -4.483821 | 0.423582  | -0.073984 |
| 5                                                 | C | 1.653610  | -2.384612 | -0.846630 | 13                                                | H | -2.318044 | 0.911346  | -1.591900 |
| 6                                                 | C | 2.859596  | 0.050283  | -0.863777 | 14                                                | H | -3.715303 | -2.077936 | 0.092548  |
| 7                                                 | C | 2.090066  | 0.500382  | 0.426387  | 15                                                | H | -2.511501 | -1.437201 | -1.997361 |
| 8                                                 | C | 0.699990  | 0.976112  | -0.050723 | 16                                                | C | 0.190869  | 1.766758  | -0.924901 |
| 9                                                 | C | 0.990144  | 1.508025  | -1.475935 | 17                                                | C | -0.459048 | 2.924806  | -1.699904 |
| 10                                                | C | 2.010728  | 0.516479  | -2.071895 | 18                                                | C | 1.396819  | 2.327871  | -0.119460 |
| 11                                                | C | 0.357451  | -1.660356 | 2.519342  | 19                                                | C | 2.228355  | 1.270982  | 0.593432  |
| 12                                                | C | 4.303886  | 0.542139  | -0.938698 | 20                                                | C | 3.167402  | 0.519643  | -0.267509 |
| 13                                                | H | 2.594002  | 1.279389  | 1.003027  | 21                                                | O | 2.091680  | 1.092662  | 1.800451  |
| 14                                                | H | 3.740132  | -1.957399 | -0.372067 | 22                                                | C | 4.041523  | -0.448310 | 0.085069  |
| 15                                                | H | 3.077044  | -0.917700 | 1.796147  | 23                                                | C | 4.923308  | -1.078184 | -0.959029 |
| 16                                                | C | -0.038133 | 1.947777  | 0.904811  | 24                                                | C | 4.233488  | -0.979349 | 1.477014  |
| 17                                                | C | 0.671884  | 3.295003  | 1.110049  | 25                                                | H | -0.192786 | 0.170954  | 0.440467  |
| 18                                                | C | -1.497249 | 2.202017  | 0.450006  | 26                                                | H | 0.085098  | -3.239208 | 0.706787  |
| 19                                                | C | -2.399546 | 0.975931  | 0.571456  | 27                                                | H | -1.339848 | -3.925420 | -0.070644 |
| 20                                                | C | -3.017294 | 0.482810  | -0.676469 | 28                                                | H | -2.342906 | -2.877491 | 1.882581  |
| 21                                                | O | -2.572800 | 0.474841  | 1.678541  | 29                                                | H | -1.251008 | -1.507131 | 1.776078  |
| 22                                                | C | -3.935778 | -0.498785 | -0.823117 | 30                                                | H | -0.768032 | 2.019722  | 1.911838  |
| 23                                                | C | -4.442802 | -0.850483 | -2.195187 | 31                                                | H | -1.895631 | 2.683842  | 0.730432  |
| 24                                                | C | -4.528802 | -1.306756 | 0.295275  | 32                                                | H | -3.421262 | 1.397624  | 2.059704  |
| 25                                                | H | 0.058416  | 0.092980  | -0.157256 | 33                                                | H | -2.230125 | 0.153935  | 2.385963  |
| 26                                                | H | 0.042345  | -3.353333 | 0.333747  | 34                                                | H | 0.345191  | -1.413399 | -2.673701 |
| 27                                                | H | 1.682154  | -3.794632 | 0.805309  | 35                                                | H | 1.175073  | -2.721372 | -1.665880 |
| 28                                                | H | 2.018234  | -3.159804 | -1.524550 | 36                                                | H | -4.588102 | 1.506702  | -0.197026 |
| 29                                                | H | 0.874488  | -1.834633 | -1.380329 | 37                                                | H | -4.750746 | -0.048735 | -1.024860 |
| 30                                                | H | 0.089240  | 1.600265  | -2.088367 | 38                                                | H | -5.212387 | 0.097723  | 0.676464  |
| 31                                                | H | 1.442404  | 2.503573  | -1.416909 | 39                                                | H | 0.587428  | 1.060382  | -1.664228 |
| 32                                                | H | 2.627298  | 0.983727  | -2.844723 | 40                                                | H | 0.273292  | 3.390390  | -2.365267 |
| 33                                                | H | 1.494251  | -0.320826 | -2.547490 | 41                                                | H | -1.293386 | 2.586934  | -2.317922 |
| 34                                                | H | 0.487849  | -0.825650 | 3.200306  | 42                                                | H | -0.832368 | 3.702061  | -1.027279 |
| 35                                                | H | -0.449477 | -2.350891 | 2.743465  | 43                                                | H | 2.044020  | 2.876011  | -0.812538 |

|    |   |          |           |           |
|----|---|----------|-----------|-----------|
| 44 | H | 1.039488 | 3.032056  | 0.635165  |
| 45 | H | 3.142512 | 0.808064  | -1.314409 |
| 46 | H | 4.751914 | -2.159720 | -0.997414 |
| 47 | H | 4.752061 | -0.662070 | -1.952435 |
| 48 | H | 5.978646 | -0.941402 | -0.698094 |
| 49 | H | 4.048853 | -2.059747 | 1.486007  |
| 50 | H | 5.278194 | -0.845513 | 1.780430  |
| 51 | H | 3.581271 | -0.494844 | 2.195744  |

**Isolobophytumin E (3) Conf. 11 P = 3.114%**

B3LYP/6-326G(d,p) Energy / Hartree = -855.5934592

|    |   |           |           |           |
|----|---|-----------|-----------|-----------|
| 1  | C | -1.055673 | -2.963683 | -0.454068 |
| 2  | C | -1.142703 | -1.824774 | -1.456845 |
| 3  | C | -2.294407 | -0.937530 | -1.033968 |
| 4  | C | -2.776080 | -1.441520 | 0.360869  |
| 5  | C | -1.653282 | -2.384928 | 0.845896  |
| 6  | C | -2.859595 | 0.049804  | 0.863492  |
| 7  | C | -2.089946 | 0.500345  | -0.426449 |
| 8  | C | -0.699996 | 0.976129  | 0.050965  |
| 9  | C | -0.990356 | 1.507584  | 1.476302  |
| 10 | C | -2.010961 | 0.515800  | 2.071855  |
| 11 | C | -0.356648 | -1.659530 | -2.519630 |
| 12 | C | -4.303966 | 0.541441  | 0.938331  |
| 13 | H | -2.593925 | 1.279426  | -1.002953 |
| 14 | H | -3.739802 | -1.957860 | 0.371139  |
| 15 | H | -3.076519 | -0.917536 | -1.796726 |
| 16 | C | 0.038058  | 1.948197  | -0.904208 |
| 17 | C | -0.672087 | 3.295425  | -1.109003 |
| 18 | C | 1.497140  | 2.202438  | -0.449275 |
| 19 | C | 2.399536  | 0.976457  | -0.571053 |
| 20 | C | 3.016550  | 0.482450  | 0.676854  |
| 21 | O | 2.573431  | 0.476138  | -1.678385 |
| 22 | C | 3.935138  | -0.499090 | 0.823248  |
| 23 | C | 4.441358  | -0.851897 | 2.195328  |
| 24 | C | 4.529005  | -1.305994 | -0.295469 |
| 25 | H | -0.058306 | 0.093057  | 0.157278  |
| 26 | H | -0.041639 | -3.353032 | -0.334450 |
| 27 | H | -1.681284 | -3.794529 | -0.806405 |
| 28 | H | -2.017935 | -3.160360 | 1.523529  |
| 29 | H | -0.874349 | -1.834987 | 1.379903  |
| 30 | H | -0.089529 | 1.599684  | 2.088872  |
| 31 | H | -1.442654 | 2.503127  | 1.417524  |
| 32 | H | -2.627699 | 0.982837  | 2.844676  |
| 33 | H | -1.494499 | -0.321561 | 2.547364  |
| 34 | H | -0.487083 | -0.824663 | -3.200389 |
| 35 | H | 0.450441  | -2.349863 | -2.743799 |
| 36 | H | -4.340965 | 1.627659  | 1.072732  |
| 37 | H | -4.857591 | 0.298317  | 0.025621  |
| 38 | H | -4.830573 | 0.079548  | 1.780662  |
| 39 | H | 0.100058  | 1.451006  | -1.878280 |
| 40 | H | -0.171536 | 3.868213  | -1.894713 |
| 41 | H | -1.714754 | 3.169119  | -1.409172 |
| 42 | H | -0.658017 | 3.904406  | -0.200541 |
| 43 | H | 1.934740  | 2.963088  | -1.105604 |
| 44 | H | 1.512309  | 2.605838  | 0.566065  |
| 45 | H | 2.688265  | 0.992659  | 1.577067  |
| 46 | H | 5.522944  | -0.686642 | 2.254616  |
| 47 | H | 3.955597  | -0.270039 | 2.979358  |
| 48 | H | 4.280272  | -1.916868 | 2.396108  |
| 49 | H | 5.620621  | -1.315494 | -0.207275 |
| 50 | H | 4.204534  | -2.349552 | -0.201781 |
| 51 | H | 4.234912  | -0.936843 | -1.272375 |

**Isolobophytumin E (3) Conf. 12 P = 3.094%**

B3LYP/6-326G(d,p) Energy / Hartree = -855.5993168

|    |   |           |           |           |
|----|---|-----------|-----------|-----------|
| 1  | C | 3.767258  | 1.660434  | 0.034369  |
| 2  | C | 2.495951  | 1.798802  | -0.783385 |
| 3  | C | 2.117979  | 0.439340  | -1.323712 |
| 4  | C | 3.393156  | -0.457089 | -1.168206 |
| 5  | C | 4.496996  | 0.445135  | -0.582424 |
| 6  | C | 2.593000  | -1.451026 | -0.246900 |
| 7  | C | 1.313304  | -0.564993 | -0.410604 |
| 8  | C | 0.812509  | -0.172378 | 0.999845  |
| 9  | C | 1.493262  | -1.221156 | 1.915258  |
| 10 | C | 2.869737  | -1.479651 | 1.275280  |
| 11 | C | 1.874294  | 2.945885  | -1.057106 |
| 12 | C | 2.490516  | -2.859225 | -0.829578 |
| 13 | H | 0.519657  | -1.059308 | -0.978613 |
| 14 | H | 3.727902  | -0.945607 | -2.085521 |
| 15 | H | 1.696476  | 0.515837  | -2.327164 |
| 16 | C | -0.723976 | -0.113533 | 1.142812  |
| 17 | C | -1.154968 | 0.154735  | 2.592795  |
| 18 | C | -1.321595 | 0.952530  | 0.187316  |
| 19 | C | -2.842850 | 0.940674  | 0.143869  |
| 20 | C | -3.443534 | -0.185277 | -0.604705 |
| 21 | O | -3.481510 | 1.822237  | 0.710595  |
| 22 | C | -4.750235 | -0.495381 | -0.750404 |
| 23 | C | -5.149970 | -1.693943 | -1.568059 |
| 24 | C | -5.896269 | 0.269298  | -0.151357 |
| 25 | H | 1.201153  | 0.819319  | 1.262752  |
| 26 | H | 3.511857  | 1.461715  | 1.081908  |
| 27 | H | 4.368492  | 2.572281  | 0.024350  |
| 28 | H | 5.141560  | 0.787083  | -1.398271 |
| 29 | H | 5.139121  | -0.072187 | 0.135488  |
| 30 | H | 1.570965  | -0.893502 | 2.954538  |
| 31 | H | 0.900645  | -2.144547 | 1.911058  |
| 32 | H | 3.308246  | -2.428027 | 1.598390  |
| 33 | H | 3.567347  | -0.694341 | 1.575445  |
| 34 | H | 0.981478  | 2.975193  | -1.673518 |
| 35 | H | 2.235596  | 3.894996  | -0.673113 |
| 36 | H | 1.782130  | -3.471890 | -0.261705 |
| 37 | H | 2.150834  | -2.833510 | -1.869841 |
| 38 | H | 3.463579  | -3.362299 | -0.806622 |
| 39 | H | -1.115762 | -1.095686 | 0.845408  |
| 40 | H | -2.242128 | 0.216617  | 2.683416  |
| 41 | H | -0.812493 | -0.636738 | 3.262492  |
| 42 | H | -0.739280 | 1.102855  | 2.950781  |
| 43 | H | -1.005349 | 1.948351  | 0.507037  |
| 44 | H | -0.941667 | 0.782862  | -0.824833 |
| 45 | H | -2.722337 | -0.834642 | -1.092619 |
| 46 | H | -5.817013 | -1.391756 | -2.383027 |
| 47 | H | -4.289657 | -2.211339 | -1.994205 |
| 48 | H | -5.715509 | -2.402064 | -0.952231 |
| 49 | H | -6.523748 | -0.408743 | 0.437937  |
| 50 | H | -5.562230 | 1.094746  | 0.468341  |
| 51 | H | -6.535158 | 0.657345  | -0.953444 |

**Isolobophytumin E (3) Conf. 13 P = 2.027%**

B3LYP/6-326G(d,p) Energy / Hartree = -855.5967944

|   |   |          |           |           |
|---|---|----------|-----------|-----------|
| 1 | C | 1.752913 | -2.264784 | -1.296951 |
| 2 | C | 0.787248 | -2.038146 | -0.149118 |
| 3 | C | 1.500107 | -1.264117 | 0.933950  |
| 4 | C | 3.029860 | -1.412641 | 0.627531  |
| 5 | C | 3.143986 | -2.306028 | -0.622724 |
| 6 | C | 3.167018 | 0.148840  | 0.508939  |

|    |   |           |           |           |    |   |           |           |           |
|----|---|-----------|-----------|-----------|----|---|-----------|-----------|-----------|
| 7  | C | 1.642706  | 0.305179  | 0.830956  | 15 | H | 1.153144  | 1.663205  | -1.680424 |
| 8  | C | 0.988313  | 1.146296  | -0.296395 | 16 | C | -0.529591 | -1.584013 | 0.569980  |
| 9  | C | 2.208811  | 1.827416  | -0.967168 | 17 | C | -0.919344 | -2.283387 | 1.882377  |
| 10 | C | 3.350371  | 0.799257  | -0.882619 | 18 | C | -1.608187 | -0.560197 | 0.175321  |
| 11 | C | -0.441604 | -2.546084 | -0.061321 | 19 | C | -2.898861 | -1.188769 | -0.342533 |
| 12 | C | 4.119481  | 0.749908  | 1.541177  | 20 | C | -4.177320 | -0.445567 | -0.416568 |
| 13 | H | 1.461922  | 0.767867  | 1.805825  | 21 | O | -2.909507 | -2.361293 | -0.704989 |
| 14 | H | 3.629279  | -1.806173 | 1.451100  | 22 | C | -4.493138 | 0.858566  | -0.274852 |
| 15 | H | 1.170484  | -1.581420 | 1.924624  | 23 | C | -5.936340 | 1.276727  | -0.395801 |
| 16 | C | -0.068302 | 2.153369  | 0.216536  | 24 | C | -3.554472 | 2.002507  | -0.001695 |
| 17 | C | -0.499462 | 3.182895  | -0.843470 | 25 | H | 0.842281  | -0.169549 | 1.436255  |
| 18 | C | -1.282943 | 1.478440  | 0.880189  | 26 | H | 2.815341  | 1.262837  | 1.908912  |
| 19 | C | -2.281363 | 0.735909  | -0.005183 | 27 | H | 3.100231  | 2.982343  | 1.689053  |
| 20 | C | -3.454336 | 0.215201  | 0.737844  | 28 | H | 4.326625  | 2.625888  | -0.355593 |
| 21 | O | -2.110080 | 0.597611  | -1.209979 | 29 | H | 4.793278  | 1.161293  | 0.498829  |
| 22 | C | -4.536263 | -0.431945 | 0.255257  | 30 | H | 2.026379  | -2.198738 | 2.072978  |
| 23 | C | -5.627949 | -0.870792 | 1.194364  | 31 | H | 1.801023  | -2.894211 | 0.470960  |
| 24 | C | -4.775015 | -0.771366 | -1.188891 | 32 | H | 4.090649  | -2.062550 | 0.357870  |
| 25 | H | 0.506595  | 0.488977  | -1.026157 | 33 | H | 3.670863  | -0.607850 | 1.240470  |
| 26 | H | 1.693631  | -1.425763 | -2.000031 | 34 | H | -0.331491 | 2.988932  | 0.049596  |
| 27 | H | 1.522502  | -3.170046 | -1.863056 | 35 | H | 0.587880  | 3.619652  | 1.524012  |
| 28 | H | 3.359583  | -3.331301 | -0.305739 | 36 | H | 2.911104  | -2.488930 | -1.945626 |
| 29 | H | 3.950985  | -2.003132 | -1.295521 | 37 | H | 2.870021  | -1.037857 | -2.956909 |
| 30 | H | 2.007255  | 2.148021  | -1.992260 | 38 | H | 4.372713  | -1.510278 | -2.149370 |
| 31 | H | 2.479996  | 2.724653  | -0.396311 | 39 | H | -0.495020 | -2.341655 | -0.220695 |
| 32 | H | 4.336175  | 1.259378  | -0.997196 | 40 | H | -1.917027 | -2.722239 | 1.810429  |
| 33 | H | 3.251018  | 0.068823  | -1.688747 | 41 | H | -0.223662 | -3.087096 | 2.132750  |
| 34 | H | -1.066940 | -2.374878 | 0.809040  | 42 | H | -0.921874 | -1.570669 | 2.714747  |
| 35 | H | -0.868539 | -3.144856 | -0.859913 | 43 | H | -1.830933 | 0.099952  | 1.018498  |
| 36 | H | 4.058328  | 1.843463  | 1.546803  | 44 | H | -1.237482 | 0.090834  | -0.625953 |
| 37 | H | 3.884321  | 0.397105  | 2.550432  | 45 | H | -4.991317 | -1.127522 | -0.649754 |
| 38 | H | 5.156866  | 0.472918  | 1.322447  | 46 | H | -6.066084 | 1.958171  | -1.243864 |
| 39 | H | 0.423084  | 2.717243  | 1.022384  | 47 | H | -6.603951 | 0.424757  | -0.526996 |
| 40 | H | -1.266463 | 3.850726  | -0.437558 | 48 | H | -6.245864 | 1.831160  | 0.497247  |
| 41 | H | 0.342694  | 3.804807  | -1.154919 | 49 | H | -3.619625 | 2.293908  | 1.053315  |
| 42 | H | -0.913754 | 2.693875  | -1.725641 | 50 | H | -2.515691 | 1.787274  | -0.230044 |
| 43 | H | -0.952056 | 0.765830  | 1.646887  | 51 | H | -3.860337 | 2.876181  | -0.584117 |
| 44 | H | -1.857827 | 2.231594  | 1.435102  |    |   |           |           |           |
| 45 | H | -3.422702 | 0.398348  | 1.808403  |    |   |           |           |           |
| 46 | H | -5.777337 | -1.953900 | 1.123331  |    |   |           |           |           |
| 47 | H | -5.409935 | -0.615594 | 2.232083  |    |   |           |           |           |
| 48 | H | -6.580319 | -0.408108 | 0.912317  |    |   |           |           |           |
| 49 | H | -4.863233 | -1.858508 | -1.299410 |    |   |           |           |           |
| 50 | H | -5.734759 | -0.352315 | -1.511837 |    |   |           |           |           |
| 51 | H | -3.981672 | -0.409367 | -1.834065 |    |   |           |           |           |

**Isolobophytumin E (3) Conf. 14 P = 1.523%**

B3LYP/6-326G(d,p) Energy / Hartree = -855.5949948

|    |   |          |           |           |
|----|---|----------|-----------|-----------|
| 1  | C | 2.878439 | 2.055882  | 1.154743  |
| 2  | C | 1.572946 | 2.134099  | 0.384643  |
| 3  | C | 1.665225 | 1.227566  | -0.820950 |
| 4  | C | 3.188197 | 0.909649  | -1.002379 |
| 5  | C | 3.937981 | 1.702518  | 0.085228  |
| 6  | C | 2.899574 | -0.625484 | -0.818820 |
| 7  | C | 1.372164 | -0.316928 | -0.669778 |
| 8  | C | 0.871753 | -0.940840 | 0.656023  |
| 9  | C | 1.989930 | -1.956447 | 1.008174  |
| 10 | C | 3.298486 | -1.322598 | 0.503644  |
| 11 | C | 0.559650 | 2.952907  | 0.667637  |
| 12 | C | 3.283809 | -1.463066 | -2.036978 |
| 13 | H | 0.781716 | -0.680454 | -1.515677 |
| 14 | H | 3.587743 | 1.124804  | -1.995500 |

**Isolobophytumin E (3) Conf. 15 P = 1.027%**

B3LYP/6-326G(d,p) Energy / Hartree = -855.5967944

|    |   |           |           |           |
|----|---|-----------|-----------|-----------|
| 1  | C | 1.752604  | -2.264739 | -1.296992 |
| 2  | C | 0.787056  | -2.038160 | -0.149057 |
| 3  | C | 1.500004  | -1.264131 | 0.933954  |
| 4  | C | 3.029743  | -1.412745 | 0.627436  |
| 5  | C | 3.143731  | -2.306076 | -0.622871 |
| 6  | C | 3.166983  | 0.148728  | 0.508889  |
| 7  | C | 1.642700  | 0.305146  | 0.830939  |
| 8  | C | 0.988330  | 1.146341  | -0.296370 |
| 9  | C | 2.208862  | 1.827409  | -0.967140 |
| 10 | C | 3.350362  | 0.799177  | -0.882649 |
| 11 | C | -0.441724 | -2.546245 | -0.061076 |
| 12 | C | 4.119504  | 0.749695  | 1.541139  |
| 13 | H | 1.461963  | 0.767846  | 1.805813  |
| 14 | H | 3.629192  | -1.806351 | 1.450946  |
| 15 | H | 1.170416  | -1.581395 | 1.924652  |
| 16 | C | -0.068214 | 2.153443  | 0.216627  |
| 17 | C | -0.499322 | 3.183052  | -0.843321 |
| 18 | C | -1.282878 | 1.478516  | 0.880236  |
| 19 | C | -2.281283 | 0.736041  | -0.005197 |
| 20 | C | -3.454228 | 0.215228  | 0.737811  |
| 21 | O | -2.110020 | 0.597894  | -1.210011 |
| 22 | C | -4.536118 | -0.431961 | 0.255207  |

|    |   |           |           |           |    |   |           |           |           |
|----|---|-----------|-----------|-----------|----|---|-----------|-----------|-----------|
| 23 | C | -5.627861 | -0.870755 | 1.194279  | 38 | H | 5.156865  | 0.472633  | 1.322384  |
| 24 | C | -4.774789 | -0.771436 | -1.188937 | 39 | H | 0.423197  | 2.717241  | 1.022515  |
| 25 | H | 0.506558  | 0.489082  | -1.026158 | 40 | H | -1.266284 | 3.850904  | -0.437368 |
| 26 | H | 1.693310  | -1.425646 | -1.999985 | 41 | H | 0.342872  | 3.804928  | -1.154734 |
| 27 | H | 1.522117  | -3.169937 | -1.863168 | 42 | H | -0.913658 | 2.694097  | -1.725507 |
| 28 | H | 3.359303  | -3.331374 | -0.305954 | 43 | H | -0.952018 | 0.765883  | 1.646923  |
| 29 | H | 3.950686  | -2.003178 | -1.295721 | 44 | H | -1.857764 | 2.231668  | 1.435147  |
| 30 | H | 2.007311  | 2.148078  | -1.992213 | 45 | H | -3.422611 | 0.398375  | 1.808372  |
| 31 | H | 2.480119  | 2.724601  | -0.396245 | 46 | H | -5.777458 | -1.953823 | 1.123134  |
| 32 | H | 4.336193  | 1.259240  | -0.997230 | 47 | H | -5.409803 | -0.615688 | 2.232023  |
| 33 | H | 3.250942  | 0.068769  | -1.688793 | 48 | H | -6.580141 | -0.407847 | 0.912287  |
| 34 | H | -1.066938 | -2.375123 | 0.809391  | 49 | H | -4.863526 | -1.858545 | -1.299349 |
| 35 | H | -0.868710 | -3.145055 | -0.859612 | 50 | H | -5.734304 | -0.351991 | -1.512077 |
| 36 | H | 4.058432  | 1.843254  | 1.546807  | 51 | H | -3.981200 | -0.409821 | -1.834021 |
| 37 | H | 3.884326  | 0.396868  | 2.550382  |    |   |           |           |           |

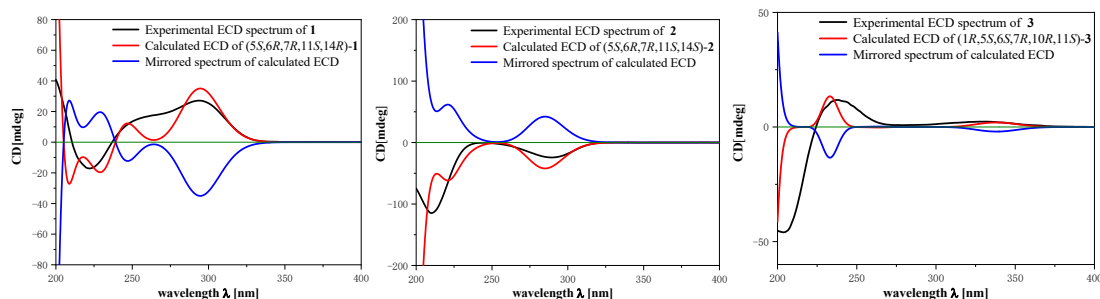

**Figure S41.** Experimental ECD spectrum (black), calculated spectrum (red) and its enantiomer (blue) of compounds **1-3**.

## Reference

- [1] Dolomanov, O.V., Bourhis, L.J., Gildea, R.J., Howard, J.A.K. & Puschmann, H. *J. Appl. Cryst.* **2009**, *42*, 339-341.
- [2] Sheldrick, G.M. *Acta Cryst.* **2015**, *A71*, 3-8.
- [3] Sheldrick, G.M. *Acta Cryst.* **2015**, *C71*, 3-8.
- [4] Frisch, M. J.; Trucks, G. W.; Schlegel, H. B.; Scuseria, G. E.; Robb, M. A.; Cheeseman, J. R.; Scalmani, G.; Barone, V.; Mennucci, B.; Petersson, G. A.; Nakatsuji, H.; Caricato, M.; Li, X.; Hratchian, H. P.; Izmaylov, A. F.; Bloino, J.; Zheng, G.; Sonnenberg, J. L.; Hada, M.; Ehara, M.; Toyota, K.; Fukuda, R.; Hasegawa, J.; Ishida, M.; Nakajima, T.; Honda, Y.; Kitao, O.; Nakai, H.; Vreven, T.; Montgomery, J. A., Jr.; Peralta, J. E.; Ogliaro, F.; Bearpark, M.; Heyd, J. J.; Brothers, E.; Kudin, K. N.; Staroverov, V. N.; Kobayashi, R.; Normand, J.; Raghavachari, K.; Rendell, A.; Burant, J. C.; Iyengar, S. S.; Tomasi, J.; Cossi, M.; Rega, N.; Millam, J. M.; Klene, M.; Knox, J. E.; Cross, J. B.; Bakken, V.; Adamo, C.; Jaramillo, J.; Gomperts, R.; Stratmann, R. E.; Yazyev, O.; Austin, A. J.; Cammi, R.; Pomelli, C.; Ochterski, J. W.; Martin, R. L.; Morokuma, K.; Zakrzewski, V. G.; Voth, G. A.; Salvador, P.; Dannenberg, J. J.; Dapprich, S.; Daniels, A. D.; Farkas, O.; Foresman, J. B.; Ortiz, J. V.; Cioslowski, J.; Fox, D. J. Gaussian 09, Gaussian, Inc.: Wallingford, CT, **2009**.
- [5] Ditchfield, R. *J. Chem. Phys.* **1972**, *56*, 5688-5691.
- [6] Ditchfield, R. *Mol. Phys.* **1974**, *27*, 789-807.
- [7] Rohlfing, C. M.; Allen, L. C.; Ditchfield, R. *Chem. Phys.* **1984**, *87*, 9-15.
- [8] Wolinski, K.; Hinton, J. F.; Pulay, P. *J. Am. Chem. Soc.* **1990**, *112*, 8251-8260.
- [9] MacroModel. Schrödinger LLC, 2015-4. Available online: <https://www.schrodinger.com/suites> (accessed on 10 December 2017).
- [10] Bruhn, T.; Schaumlöffel, A.; Hemberger, Y.; Bringmann, G., *Chirality* **2013**, *25*, 243-249.
